# Supplementary material for: Selenium dioxide promoted selenylation/cyclization of leucosceptrane sesterterpenoids
Source: Royal Society of Chemistry journal article supplement (doi:10.1039/d4cc03674c), 2024-01-01

## ***Supporting Information***

### **Selenium Dioxide Promoted Selenylation/Cyclization of Leucosceptrane Sesterterpenoids**

Hao Geng,<sup>a</sup> Ran Fu,<sup>ac</sup> Ting-Ting Zhou,<sup>a</sup> Man Li,<sup>a</sup> Yan-Chun Liu,<sup>ac</sup> Xiao-Nian Li,<sup>a</sup>  
Yan Liu,<sup>b</sup> Yu Zheng<sup>\*a</sup>, Sheng-Hong Li<sup>\*ab</sup>

<sup>a</sup>*Key Laboratory of Phytochemistry and Natural Medicines, and Yunnan Key Laboratory of Natural Medicinal Chemistry, Kunming Institute of Botany, Chinese Academy of Sciences, Kunming 650201, P. R. China*

<sup>b</sup>*Innovative Institute of Chinese Medicine and Pharmacy, Chengdu University of Traditional Chinese Medicine, Chengdu 611137, P. R. China*

<sup>c</sup>*University of Chinese Academy of Sciences, Beijing 100049, P. R. China*

## **Table of Contents**

|                                                                  |            |
|------------------------------------------------------------------|------------|
| <b>1. General Information</b>                                    | <b>S2</b>  |
| <b>2. Synthetic Procedures and Characterization Data</b>         | <b>S3</b>  |
| <b>3. X-ray Crystallographic Data</b>                            | <b>S11</b> |
| <b>4. Immunosuppressive Activity Analysis</b>                    | <b>S16</b> |
| <b>5. Copies of <sup>1</sup>H and <sup>13</sup>C NMR Spectra</b> | <b>S17</b> |

## 1. General Information

Unless otherwise stated, all oxygen or moisture sensitive reactions were conducted in flame-dried glassware under an atmosphere of nitrogen. All solvents were purified and dried according to standard methods prior to use. All reagents were purchased from commercial sources and were used without further purification.

Chromatographic purification of products was accomplished using forced-flow chromatography on 200-300 mesh silica gel. The TLC glass plates were performed on 0.20 mm or 1.0 mm (preparative) silica gel GF254 plates. Visualization was performed using ultraviolet light (254 nm), potassium permanganate ( $\text{KMnO}_4$ ) in EtOH.

$^1\text{H}$  and  $^{13}\text{C}$  NMR spectra were acquired on Bruker Avance III-500, 600, or 800 spectrometers (Bruker Corp., Germany), and TMS was used as internal standard. Chemical shifts were given in parts per million (ppm) with reference to residual solvent signals [ $^1\text{H}$  NMR:  $\text{CD}_3\text{COCD}_3$  (2.05);  $^{13}\text{C}$  NMR:  $\text{CD}_3\text{COCD}_3$  (206.26, 29.84)]. Peak multiplicities were recorded as follows: s = singlet, d = doublet, t = triplet, q = quartet, m = multiplet or unresolved, brs = broad singlet. High resolution mass spectral (HRMS) data were obtained at the mass spectrometry service operated on a Shimadzu UPLC-IT-TOF (Shimadzu Corp., Japan) equipment with electrospray ionization (ESI) and were reported as m/z. Melting points were measured on a WRX-5A melting point apparatus.

## 2. Synthetic Procedures and Characterization Data

### 2.1 Syntheses of compounds 10-13

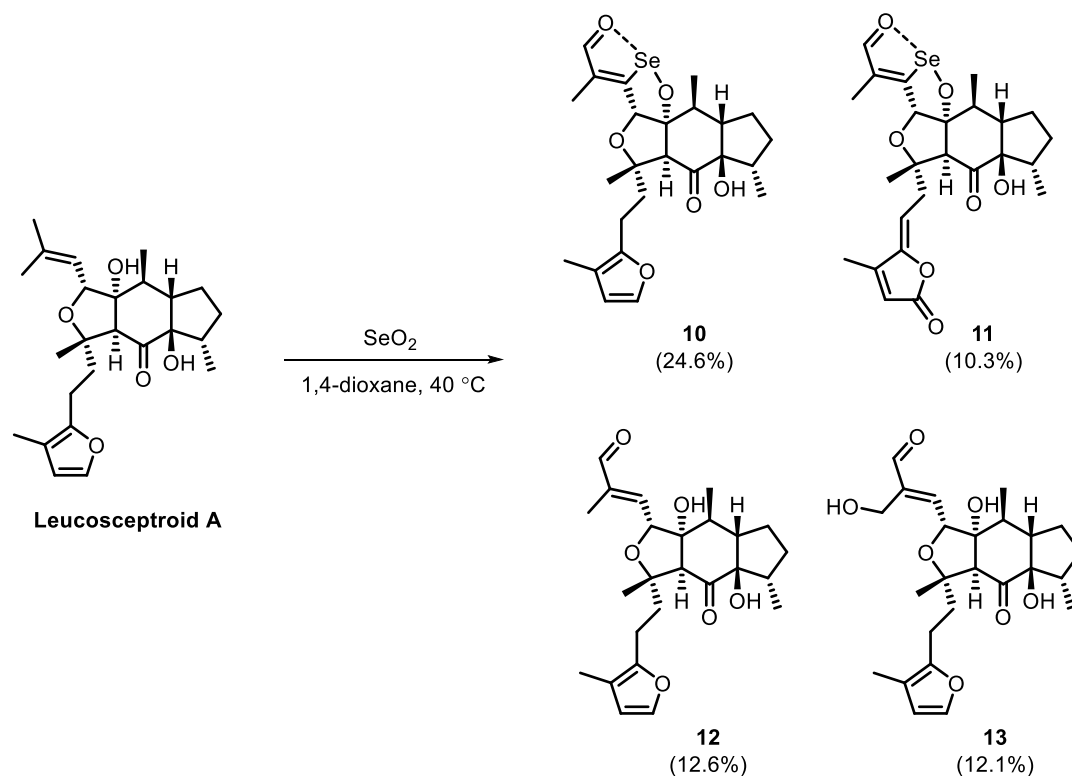

To a solution of leucosceptroid A (10.0 mg, 0.024 mmol, 1.0 equiv) in 1,4-dioxane (2 mL) was added selenium dioxide (8.0 mg, 0.072 mmol, 3.0 equiv) at room temperature. The resulting solution was stirred at 40 °C for 12 h. Upon complete consumption of the starting material, the reaction mixture was cooled to room temperature and concentrated *in vacuo*. The crude residue was purified by reversed-phase semi-preparative HPLC using acetonitrile/water (75/25, v/v) as eluent (flow rate: 3.0 mL/min; column: Agilent SB-C18, 10 × 250 mm; detection: 238 nm) to give compounds **10** (3.0 mg, 24.6% yield, retention times: 17.3 min) as a pale yellow needle crystal, **11** (1.3 mg, 10.3% yield, retention times: 18.8 min) as a pale yellow oil, **12** (1.3 mg, 12.6% yield, retention times: 15.2 min) as a colorless oil, and **13** (1.3 mg, 12.1% yield, retention times: 9.1 min) as a colorless oil.

#### Compound 10

$^1\text{H}$  NMR (600 MHz,  $\text{CD}_3\text{COCD}_3$ )  $\delta$  9.78 (s, 1H, H-1), 7.21 (d,  $J = 1.9$  Hz, 1H, H-20), 6.12 (d,  $J = 1.9$  Hz, 1H, H-19), 5.74 (s, 1H, H-4), 4.21 (s, 1H, 11-OH), 2.93 (s, H-13, 1H), 2.60 – 2.49

(m, 2H, H-16), 2.46 (s, 3H, Me-21), 2.29 (m, 1H, H-10), 2.19 (m, 1H, H-7), 2.10 (m, 1H, H-6), 2.03 (m, 1H, H-9a), 1.95 (m, 1H, H-15a), 1.92 (m, 1H, H-8a), 1.90 (m, 1H, H-15b), 1.80 (s, 3H, Me-25), 1.78 (m, 1H, H-8b), 1.51 (m, 1H, H-9b), 1.35 (s, 3H, Me-24), 0.91 (d, 3H,  $J = 6.8$  Hz, Me-22), 0.88 (d, 3H,  $J = 7.3$  Hz, Me-23);

**$^{13}\text{C}$  NMR** (151 MHz,  $\text{CD}_3\text{COCD}_3$ )  $\delta$  210.7 (s, C-12), 188.9 (d, C-1), 176.4 (s, C-3), 151.4 (s, C-17), 140.8 (d, C-20), 126.0 (s, C-2), 114.3 (s, C-18), 113.6 (d, C-19), 97.2 (s, C-5), 88.8 (s, C-14), 85.6 (s, C-11), 85.2 (d, C-4), 70.9 (d, C-13), 50.6 (d, C-7), 46.7 (d, C-10), 42.4 (d, C-6), 42.3 (t, C-15), 31.6 (t, C-9), 30.7 (t, C-8), 23.5 (q, C-24), 21.6 (t, C-16), 16.6 (q, C-23), 15.2 (q, C-22), 13.6 (q, C-21), 9.7 (q, C-25);

**HRMS** (ESI):  $m/z$  calcd for  $\text{C}_{25}\text{H}_{32}\text{O}_6\text{SeNa}$   $[\text{M}+\text{Na}]^+$  531.1262, found 531.1260;

**Melting point** 154 – 156 °C.

### Compound 11

**$^1\text{H}$  NMR** (600 MHz,  $\text{CD}_3\text{COCD}_3$ )  $\delta$  9.79 (s, 1H, H-1), 6.01 (s, 1H, H-19), 5.73 (s, 1H, H-4), 5.40 (t,  $J = 7.6$  Hz, 1H, H-16), 4.25 (s, 1H, 11-OH), 2.99 (s, 1H, H-13), 2.84 (m, 1H, H-15a), 2.71 (dd,  $J = 15.1, 7.3$  Hz, 1H, H-15b), 2.45 (s, 3H, Me-21), 2.26 (m, 1H, H-10), 2.23 (m, 1H, H-7), 2.16 (s, 3H, Me-25), 1.97 (m, 1H, H-9a), 1.96 (m, 1H, H-6), 1.94 (m, 1H, H-8a), 1.84 (m, 1H, H-8b), 1.51 (m, 1H, H-9b), 1.39 (s, 3H, Me-24), 0.91 (d,  $J = 6.8$  Hz, 3H, Me-22), 0.84 (d,  $J = 7.3$  Hz, 3H, Me-23);

**$^{13}\text{C}$  NMR** (151 MHz,  $\text{CD}_3\text{COCD}_3$ )  $\delta$  211.0 (s, C-12), 189.3 (d, C-1), 175.5 (s, C-3), 169.3 (s, C-20), 156.1 (s, C-18), 153.0 (s, C-17), 126.0 (s, C-2), 116.9 (d, C-19), 108.3 (d, C-16), 97.6 (s, C-5), 88.3 (s, C-14), 85.8 (s, C-11), 84.9 (d, C-3), 69.4 (d, C-13), 51.4 (d, C-7), 47.1 (d, C-10), 41.5 (d, C-6), 40.2 (t, C-15), 31.8 (t, C-9), 30.5 (t, C-8), 24.3 (q, C-24), 16.4 (q, C-23), 15.8 (q, C-22), 13.7 (q, C-21), 11.8 (q, C-25);

**HRMS** (ESI):  $m/z$  calcd for  $\text{C}_{25}\text{H}_{30}\text{O}_7\text{SeNa}$   $[\text{M}+\text{Na}]^+$  545.1054, found 545.1052.

## Compound 12

**<sup>1</sup>H NMR** (800 MHz, CD<sub>3</sub>COCD<sub>3</sub>)  $\delta$  9.53 (s, 1H, H-1), 7.29 (s, 1H, H-20), 6.88 (d,  $J$  = 8.4 Hz, 1H, H-3), 6.18 (s, 1H, H-19), 5.00 (d,  $J$  = 8.5 Hz, 1H, H-4), 4.29 (s, 1H, 5-OH), 4.28 (s, 1H, 11-OH), 2.87 (s, 1H, H-13), 2.77 (m, 1H, H-16a), 2.73 (m, 1H, H-16b), 2.31 (m, 1H, H-10), 2.11 (m, 1H, H-7), 2.07 (overlap, 1H, H-15a), 1.97 (m, 1H, H-15b), 1.95 (s, 3H, Me-25), 1.87 (m, 1H, H-6), 1.85 (s, 3H, Me-21), 1.74 – 1.72 (m, 2H, H-8), 1.45 – 1.42 (m, 2H, H-9), 1.28 (s, 3H, Me-24), 0.96 (d,  $J$  = 6.8 Hz, 3H, Me-22), 0.85 (d,  $J$  = 7.4 Hz, 3H, Me-23);

**<sup>13</sup>C NMR** (201 MHz, CD<sub>3</sub>COCD<sub>3</sub>)  $\delta$  212.1 (s, C-12), 195.8 (d, C-1), 151.7 (s, C-17), 149.0 (d, C-3), 141.7 (s, C-2), 140.8 (d, C-20), 114.3 (s, C-18), 113.7 (d, C-19), 85.9 (s, C-5), 85.8 (s, C-14), 85.6 (s, C-11), 76.7 (d, C-4), 72.2 (d, C-13), 50.4 (d, C-7), 46.3 (d, C-10), 43.6 (t, C-15), 42.3 (d, C-6), 31.1 (t, C-9), 30.3 (t, C-8), 23.6 (q, C-24), 21.7 (t, C-16), 17.2 (q, C-23), 14.3 (q, C-22), 10.3 (q, C-21), 9.9 (q, C-25);

**HRMS** (ESI):  $m/z$  calcd for C<sub>26</sub>H<sub>34</sub>O<sub>6</sub>Na [M+Na]<sup>+</sup> 453.2253, found 453.2246.

## Compound 13

**<sup>1</sup>H NMR** (500 MHz, CD<sub>3</sub>COCD<sub>3</sub>)  $\delta$  9.55 (s, 1H, H-1), 7.29 (d,  $J$  = 1.8 Hz, 1H, H-20), 6.95 (d,  $J$  = 7.7 Hz, 1H, H-3), 6.18 (d,  $J$  = 1.8 Hz, 1H, H-19), 5.25 (d,  $J$  = 7.7 Hz, 1H, H-4), 4.51 (s, 1H, 5-OH), 4.44 (dd,  $J$  = 12.1, 5.2 Hz, 1H, H-21a), 4.38 (dd,  $J$  = 12.1, 6.0 Hz, 1H, H-21b), 4.22 (s, 1H, 11-OH), 3.99 (t,  $J$  = 5.7 Hz, 1H, 21-OH), 2.86 (s, 1H, H-13), 2.77 (m, 1H, H-16a), 2.72 (m, 1H, H-16b), 2.30 (dd,  $J$  = 10.8, 4.9 Hz, 1H, H-10), 2.21 (m, 1H, H-7), 2.08 (m, 2H, H-15), 2.06 (m, 1H, H-9a), 2.05 (m, 1H, H-8a), 1.95 (s, 3H, Me-25), 1.90 (m, 1H, H-6), 1.74 (m, 1H, H-8b), 1.44 (m, 1H, H-9b), 1.29 (s, 3H, Me-24), 1.05 (d,  $J$  = 6.8 Hz, 3H, Me-22), 0.85 (d,  $J$  = 7.3 Hz, 3H, Me-23);

**<sup>13</sup>C NMR** (126 MHz, CD<sub>3</sub>COCD<sub>3</sub>)  $\delta$  212.3 (s, C-12), 195.3 (d, C-1), 151.7 (s, C-17), 150.8 (d, C-3), 144.8 (s, C-2), 140.8 (d, C-20), 114.3 (s, C-18), 113.7 (d, C-19), 86.0 (s, C-5), 85.9 (s, C-11), 85.7 (s, C-14), 77.2 (d, C-4), 72.3 (d, C-13), 55.0 (t, C-21), 50.1 (d, C-7), 46.5 (d, C-10),

43.6 (t, C-15), 42.1 (d, C-6), 31.1 (t, C-9), 30.7 (t, C-8), 23.5 (q, C-24), 21.8 (t, C-16), 17.3 (q, C-23), 14.6 (q, C-22), 9.9 (q, C-25);

**HRMS** (ESI):  $m/z$  calcd for  $C_{26}H_{34}O_6Na$   $[M+Na]^+$  469.2202, found 469.2207.

## 2.2 Syntheses of compounds 14-16

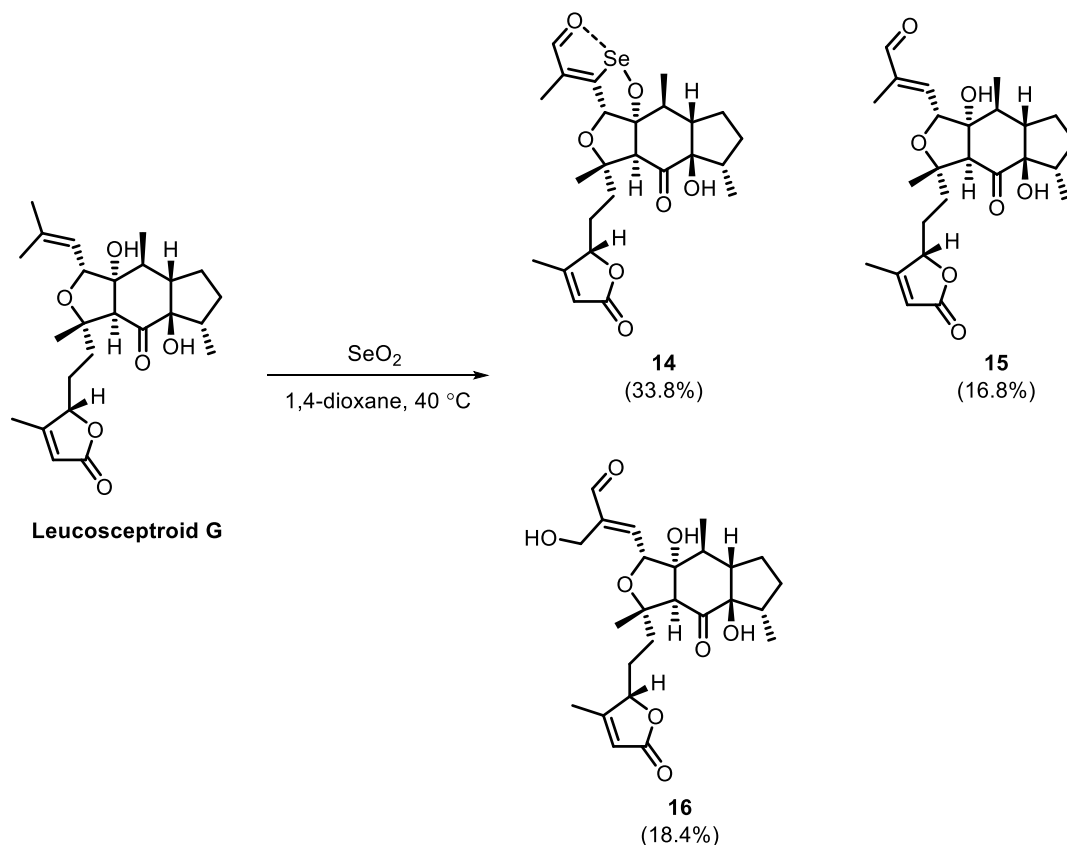

To a solution of leucosceptroid G (10.0 mg, 0.023 mmol, 1.0 equiv) in 1,4-dioxane (2 mL) was added selenium dioxide (7.7 mg, 0.069 mmol, 3.0 equiv) at room temperature. The resulting solution was stirred at 40 °C for 12 h. Upon complete consumption of the starting material, the reaction mixture was cooled to room temperature and concentrated *in vacuo*. The crude residue was purified by reversed-phase semi-preparative HPLC using acetonitrile/water (60/40, *v/v*) as eluent (flow rate: 3.0 mL/min; column: Agilent SB-C18, 10 × 250 mm; detection: 238 nm) to give compounds **14** (4.1 mg, 33.8% yield, retention times: 23.6 min) as a pale yellow oil, **15** (1.7 mg, 16.8% yield, retention times: 11.5 min) as a colorless oil, and **16** (2.0 mg, 18.4% yield, retention times: 5.7 min) as a colorless oil.

## Compound 14

**<sup>1</sup>H NMR** (600 MHz, CD<sub>3</sub>COCD<sub>3</sub>)  $\delta$  9.77 (s, 1H, H-1), 5.78 (s, 1H, H-19), 5.69 (s, 1H, H-4), 4.89 (s, 1H, H-17), 4.23 (s, 1H, 11-OH), 2.91 (s, 1H, H-13), 2.42 (s, 3H, Me-21), 2.28 (m, 1H, H-10), 2.18 (m, 1H, H-7), 2.08 (m, 1H, H-8a), 2.04 (m, 1H, H-16a), 2.01 (m, 1H, H-9a), 1.97 (s, 3H, Me-25), 1.93 (m, 1H, H-6), 1.81 (m, 1H, H-8b), 1.80 (m, 1H, H-15a), 1.67 (m, 1H, H-15b), 1.54 (m, 1H, H-16b), 1.52 (m, 1H, H-9b), 1.31 (s, 3H, Me-24), 0.90 (d,  $J$  = 6.7 Hz, 3H, Me-22), 0.88 (d,  $J$  = 7.2 Hz, 3H, Me-23);

**<sup>13</sup>C NMR** (151 MHz, CD<sub>3</sub>COCD<sub>3</sub>)  $\delta$  211.2 (s, C-12), 189.2 (d, C-1), 175.8 (s, C-3), 173.1 (s, C-20), 170.1 (s, C-18), 125.8 (s, C-2), 117.3 (d, C-19), 97.2 (s, C-5), 88.5 (s, C-14), 85.7 (s, C-11), 84.9 (d, C-17), 84.6 (d, C-4), 70.3 (d, C-13), 50.9 (d, C-7), 46.9 (d, C-10), 41.8 (d, C-6), 37.9 (t, C-15), 31.7 (t, C-9), 30.6 (t, C-8), 27.5 (t, C-16), 23.8 (q, C-24), 16.7 (q, C-23), 15.5 (q, C-22), 13.8 (q, C-25), 13.6 (q, C-21);

**HRMS** (ESI):  $m/z$  calcd for C<sub>25</sub>H<sub>32</sub>O<sub>7</sub>SeNa [M+Na]<sup>+</sup> 547.1211, found 547.1209.

## Compound 15

**<sup>1</sup>H NMR** (600 MHz, CD<sub>3</sub>COCD<sub>3</sub>)  $\delta$  9.52 (s, 1H, H-1), 6.85 (dd,  $J$  = 8.5, 1.5 Hz, 1H, H-19), 5.83 (s, 1H, H-3), 5.03 (brs, 1H, H-17), 4.97 (d,  $J$  = 8.6 Hz, 1H, H-4), 4.31 (s, 1H, 5-OH), 4.26 (s, 1H, 11-OH), 2.80 (s, 1H, H-13), 2.30 (m, 1H, H-10), 2.23 (m, 1H, H-16a), 2.15 (overlap, 1H, H-9a), 2.15 (overlap, 1H, H-8a), 2.12 (s, 3H, Me-25), 2.09 (m, 1H, H-7), 1.87 (m, 1H, H-6), 1.86 – 1.84 (m, 2H, H-15), 1.83 (s, 3H, Me-21), 1.72 (m, 1H, H-8b), 1.68 (m, 1H, H-16b), 1.42 (m, 1H, H-9b), 1.24 (s, 3H, Me-24), 0.96 (d,  $J$  = 6.7 Hz, 3H, Me-22), 0.84 (d,  $J$  = 7.4 Hz, 3H, Me-23);

**<sup>13</sup>C NMR** (151 MHz, CD<sub>3</sub>COCD<sub>3</sub>)  $\delta$  212.1 (s, C-12), 195.8 (s, C-1), 173.3 (s, C-20), 170.4 (s, C-18), 148.9 (d, C-3), 141.7 (s, C-2), 117.3 (d, C-19), 85.7 (s, C-14), 85.7 (s, C-5), 85.6 (s, C-11), 85.0 (d, C-17), 76.5 (d, C-4), 72.2 (d, C-13), 50.3 (d, C-7), 46.2 (d, C-10), 42.3 (d, C-6), 39.2 (t, C-15), 31.0 (t, C-9), 30.6 (t, C-8), 27.6 (t, C-16), 23.7 (q, C-24), 17.2 (q, C-23), 14.2 (q, C-22), 13.9 (q, C-25), 10.3 (q, C-21);

**HRMS** (ESI):  $m/z$  calcd for  $C_{25}H_{34}O_7Na$   $[M+Na]^+$  469.2202, found 469.2204.

### Compound 16

**$^1H$  NMR** (600 MHz,  $CD_3COCD_3$ )  $\delta$  9.53 (s, 1H, H-1), 6.93 (d,  $J = 7.8$  Hz, 1H, H-3), 5.83 (t,  $J = 1.6$  Hz, 1H, H-19), 5.22 (d,  $J = 7.8$  Hz, 1H, H-4), 5.03 (dd,  $J = 7.9, 3.6$  Hz, 1H, H-17), 4.51 (s, 1H, 5-OH), 4.41 (dd,  $J = 12.2, 5.2$  Hz, 1H, H-21a), 4.36 (dd,  $J = 12.2, 6.1$  Hz, 1H, H-21b), 4.23 (s, 1H, 11-OH), 3.98 (t,  $J = 5.7$  Hz, 1H, 21-OH), 2.80 (s, 1H, H-13), 2.30 (m, 1H, H-10), 2.27 (m, 1H, H-16a), 2.21 (m, 1H, H-7), 2.12 (s, 3H, Me-25), 2.09 (m, 1H, H-9a), 2.07 (m, 1H, H-8a), 1.88 (m, 1H, H-6), 1.86 – 1.83 (m, 2H, H-15), 1.73 (m, 1H, H-8b), 1.69 (m, 1H, H-16b), 1.43 (m, 1H, H-9b), 1.25 (s, 3H, Me-24), 1.03 (d,  $J = 7.0$  Hz, 3H, Me-22), 0.84 (d,  $J = 7.5$  Hz, 3H, Me-23);

**$^{13}C$  NMR** (151 MHz,  $CD_3COCD_3$ )  $\delta$  212.3 (s, C-12), 195.3 (d, C-1), 173.3 (s, C-20), 170.4 (s, C-18), 150.6 (d, C-3), 144.7 (s, C-2), 117.3 (d, C-19), 85.8 (s, C-14), 85.7 (s, C-5), 85.6 (s, C-11), 85.0 (d, C-17), 76.9 (d, C-4), 72.2 (d, C-13), 54.9 (t, C-21), 49.9 (d, C-7), 46.4 (d, C-10), 42.0 (d, C-6), 39.2 (t, C-15), 31.0 (t, C-9), 30.6 (t, C-8), 27.6 (t, C-16), 23.7 (q, C-24), 17.3 (q, C-23), 14.4 (q, C-22), 13.9 (q, C-25);

**HRMS** (ESI):  $m/z$  calcd for  $C_{25}H_{34}O_8Na$   $[M+Na]^+$  485.2151, found 485.2149.

### 2.3 Syntheses of compounds 17 and 18

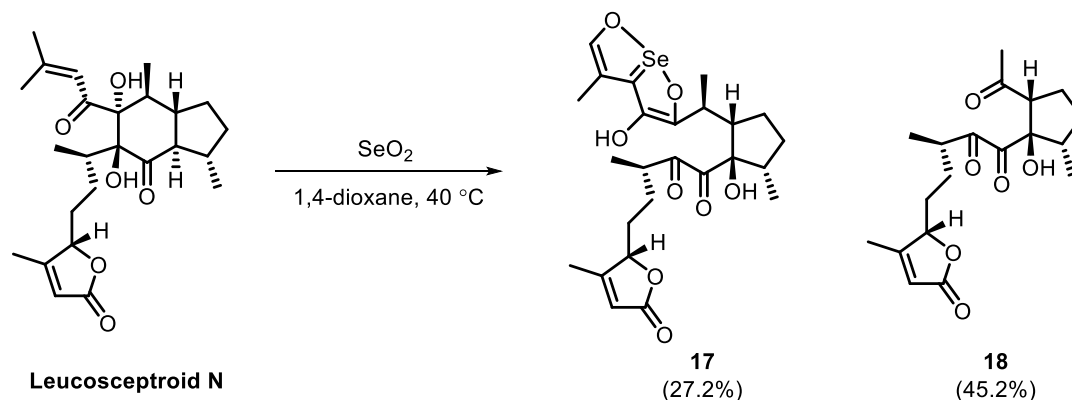

To a solution of leucosceptroid N (10.0 mg, 0.023 mmol, 1.0 equiv) in 1,4-dioxane (2 mL) was added selenium dioxide (7.7 mg, 0.069 mmol, 3.0 equiv) at room temperature. The resulting solution was stirred at 40 °C for 12 h. Upon complete consumption of the starting material, the reaction mixture was cooled to room temperature and concentrated *in vacuo*. The crude residue was purified by reversed-phase semi-preparative HPLC using acetonitrile/water (80/20, v/v) as eluent (flow rate: 3.0 mL/min; column: Aglient SB-C18, 10 × 250 mm; detection: 238 nm) to give compounds **17** (3.4 mg, 27.2% yield, retention times: 10.4 min) as a yellow needle crystal and **18** (3.7 mg, 45.2% yield, retention times: 18.1 min) as a colorless oil.

### Compound 17

**<sup>1</sup>H NMR** (800 MHz, CD<sub>3</sub>COCD<sub>3</sub>)  $\delta$  8.57 (s, 1H, H-1), 7.01 (s, 1H, 4-OH), 5.82 (s, 1H, H-19), 4.87 (brs, 1H, H-17), 3.26 (m, 1H, H-6), 3.12 (q,  $J$  = 7.0 Hz, 1H, H-14), 3.07 (t,  $J$  = 7.7 Hz, 1H, H-11), 2.75 (m, 1H, H-7), 2.45 (s, 3H, Me-21), 2.08 (s, 3H, Me-25), 2.00 (m, 1H, H-8a), 1.92 (m, 1H, H-10), 1.83 (m, 1H, H-9a), 1.81 (m, 1H, H-16a), 1.65 (m, 1H, H-8b), 1.49 (m, 1H, H-15a), 1.38 (m, 1H, H-9b), 1.25 (m, 1H, H-15b), 1.19 (m, 1H, H-16b), 1.16 (d,  $J$  = 6.8 Hz, 3H, Me-22), 1.00 (d,  $J$  = 7.2 Hz, 3H, Me-24), 0.93 (d,  $J$  = 6.7 Hz, 3H, Me-23);

**<sup>13</sup>C NMR** (201 MHz, CD<sub>3</sub>COCD<sub>3</sub>)  $\delta$  202.1 (s, C-13), 200.2 (s, C-12), 181.4 (s, C-5), 173.3 (s, C-20), 170.3 (d, C-1), 170.2 (s, C-18), 166.9 (s, C-3), 136.5 (s, C-4), 117.3 (d, C-19), 114.7 (s, C-2), 84.9 (d, C-17), 56.2 (d, C-11), 48.1 (d, C-7), 42.3 (d, C-10), 41.0 (d, C-6), 39.1 (d, C-14), 35.0 (t, C-9), 30.7 (t, C-8), 30.4 (t, C-16), 27.2 (t, C-15), 20.5 (q, C-23), 17.3 (q, C-22), 16.9 (q, C-24), 13.9 (q, C-25), 12.1 (q, C-21);

**HRMS** (ESI):  $m/z$  calcd for C<sub>25</sub>H<sub>32</sub>O<sub>7</sub>SeNa [M+Na]<sup>+</sup> 547.1211, found 547.1210;

**Melting point** 72 – 74 °C.

### Compound 18

**<sup>1</sup>H NMR** (600 MHz, CD<sub>3</sub>COCD<sub>3</sub>)  $\delta$  5.82 (s, 1H, H-19), 4.94 (brs, 1H, H-17), 3.49 (t,  $J$  = 8.1 Hz, 1H, H-11), 3.36 (m, 1H, H-14), 3.32 (m, 1H, H-7), 2.14 (overlap, 1H, H-10), 2.13 (s, 3H, Me-22), 2.10 (s, 3H, Me-25), 2.09 (m, 1H, H-8a), 1.98 (1H, m, H-16a), 1.89 (m, 1H, H-9a),

1.85 (m, 1H, H-8b), 1.73 (m, 1H, H-15a), 1.49 (m, 1H, H-16b) 1.42 (m, 1H, H-15b), 1.36 (m, 1H, H-9b), 1.09 (d,  $J = 7.1$  Hz, 3H, Me-24), 1.01 (d,  $J = 6.7$  Hz, 3H, Me-23);

**$^{13}\text{C}$  NMR** (151 MHz,  $\text{CD}_3\text{COCD}_3$ )  $\delta$  208.7 (s, C-6), 203.4 (s, C-13), 201.5 (s, C-12), 173.2 (s, C-20), 170.2 (s, C-18), 117.3 (d, C-19), 84.7 (d, C-17), 57.1 (d, C-7), 53.6 (d, C-11), 39.5 (d, C-10), 39.3 (d, C-14), 34.6 (t, C-9), 30.0 (t, C-16), 28.9 (t, C-8), 28.5 (q, C-22), 27.4 (t, C-15), 19.9 (q, C-23), 16.3 (q, C-24), 13.8 (q, C-25);

**HRMS** (ESI):  $m/z$  calcd for  $\text{C}_{19}\text{H}_{26}\text{O}_5\text{Na}$   $[\text{M}+\text{Na}]^+$  357.1678, found 357.1672.

### 3. X-ray Crystallographic Data

#### 3.1 X-ray crystallographic data of compound 10

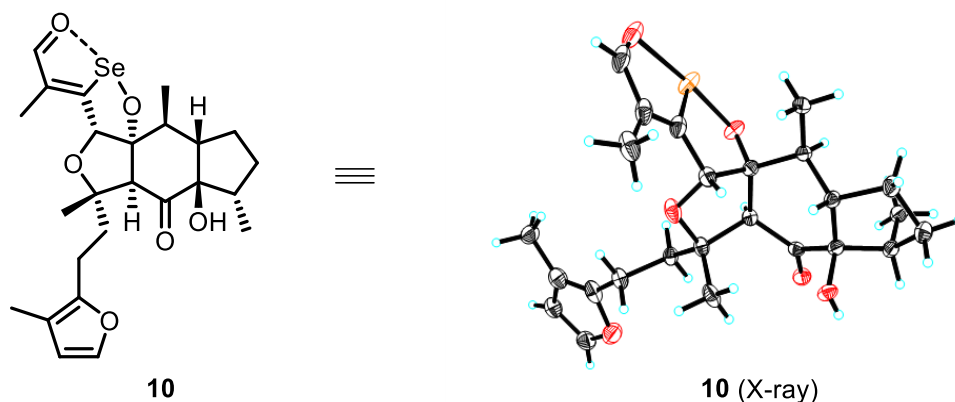

Crystal data for **10**:  $C_{25}H_{32}O_6Se$ ,  $M = 507.46$ ,  $a = 11.3051(3) \text{ \AA}$ ,  $b = 6.2777(2) \text{ \AA}$ ,  $c = 16.4774(4) \text{ \AA}$ ,  $\alpha = 90^\circ$ ,  $\beta = 97.2010(10)^\circ$ ,  $\gamma = 90^\circ$ ,  $V = 1160.18(6) \text{ \AA}^3$ ,  $T = 100.2(2) \text{ K}$ , space group  $P1211$ ,  $Z = 2$ ,  $\mu(\text{Cu K}\alpha) = 2.516 \text{ mm}^{-1}$ , 21368 reflections measured, 4464 independent reflections ( $R_{int} = 0.0321$ ). The final  $R_I$  values were 0.0398 ( $I > 2\sigma(I)$ ). The final  $wR(F^2)$  values were 0.1087 ( $I > 2\sigma(I)$ ). The final  $R_I$  values were 0.0404 (all data). The final  $wR(F^2)$  values were 0.1094 (all data). The goodness of fit on  $F^2$  was 1.050. Flack parameter = 0.031(6).

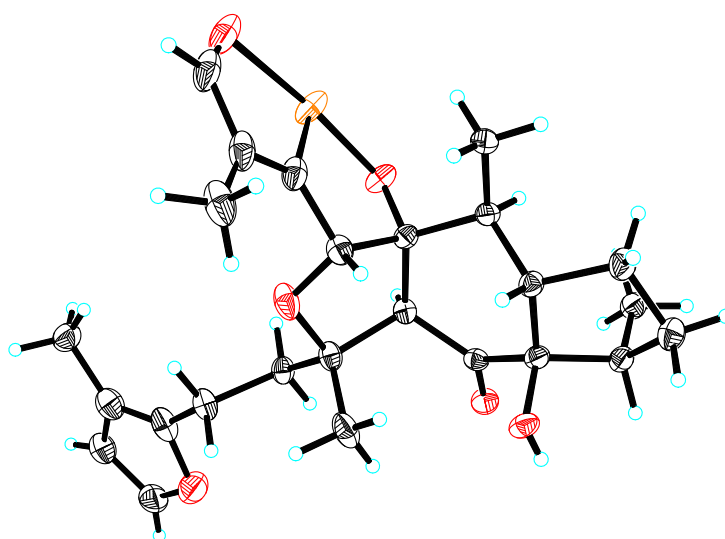

View of a molecule of **10** with the atom-labelling scheme.

Displacement ellipsoids are drawn at the 30% probability level.

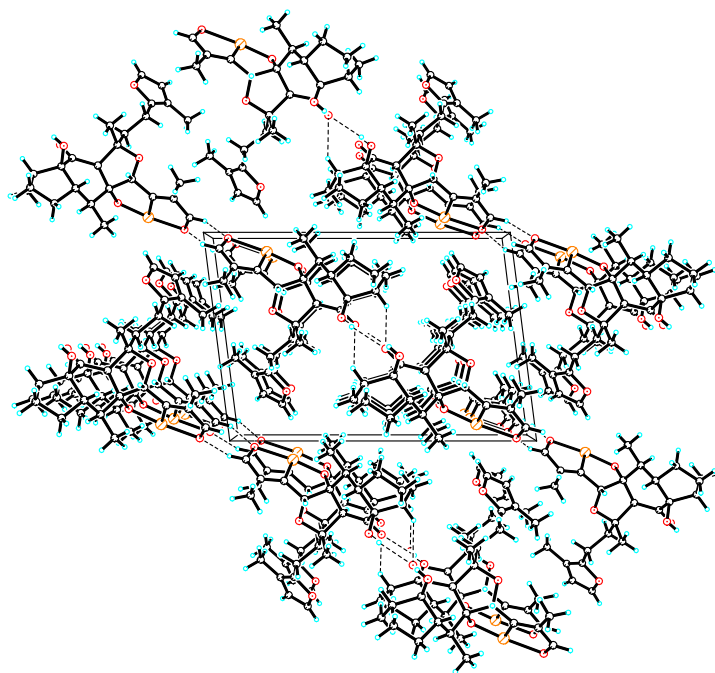

View of the pack drawing of **10**.

Hydrogen-bonds are shown as dashed lines.

**Table S1. Crystal data and structure refinement for 10.**

|                        |                                                   |                               |
|------------------------|---------------------------------------------------|-------------------------------|
| Identification code    | global                                            |                               |
| Empirical formula      | C <sub>25</sub> H <sub>32</sub> O <sub>6</sub> Se |                               |
| Formula weight         | 507.46                                            |                               |
| Temperature            | 100(2) K                                          |                               |
| Wavelength             | 1.54178 Å                                         |                               |
| Crystal system         | Monoclinic                                        |                               |
| Space group            | P 1 21 1                                          |                               |
| Unit cell dimensions   | a = 11.3051(3) Å                                  | $\alpha = 90^\circ$ .         |
|                        | b = 6.2777(2) Å                                   | $\beta = 97.2010(10)^\circ$ . |
|                        | c = 16.4774(4) Å                                  | $\gamma = 90^\circ$ .         |
| Volume                 | 1160.18(6) Å <sup>3</sup>                         |                               |
| Z                      | 2                                                 |                               |
| Density (calculated)   | 1.453 Mg/m <sup>3</sup>                           |                               |
| Absorption coefficient | 2.516 mm <sup>-1</sup>                            |                               |
| F(000)                 | 528                                               |                               |
| Crystal size           | 0.480 x 0.050 x 0.030 mm <sup>3</sup>             |                               |

|                                   |                                                             |
|-----------------------------------|-------------------------------------------------------------|
| Theta range for data collection   | 2.70 to 72.29°.                                             |
| Index ranges                      | -13<= <i>h</i> <=13, -7<= <i>k</i> <=7, -20<= <i>l</i> <=20 |
| Reflections collected             | 21368                                                       |
| Independent reflections           | 4464 [R(int) = 0.0321]                                      |
| Completeness to theta = 72.29°    | 99.9 %                                                      |
| Absorption correction             | Semi-empirical from equivalents                             |
| Max. and min. transmission        | 0.93 and 0.34                                               |
| Refinement method                 | Full-matrix least-squares on F <sup>2</sup>                 |
| Data / restraints / parameters    | 4464 / 1 / 296                                              |
| Goodness-of-fit on F <sup>2</sup> | 1.050                                                       |
| Final R indices [I>2σ(I)]         | R1 = 0.0398, wR2 = 0.1087                                   |
| R indices (all data)              | R1 = 0.0404, wR2 = 0.1094                                   |
| Absolute structure parameter      | 0.031(6)                                                    |
| Largest diff. peak and hole       | 1.177 and -0.305 e.Å <sup>-3</sup>                          |

### 3.2 X-ray crystallographic data of compound 17

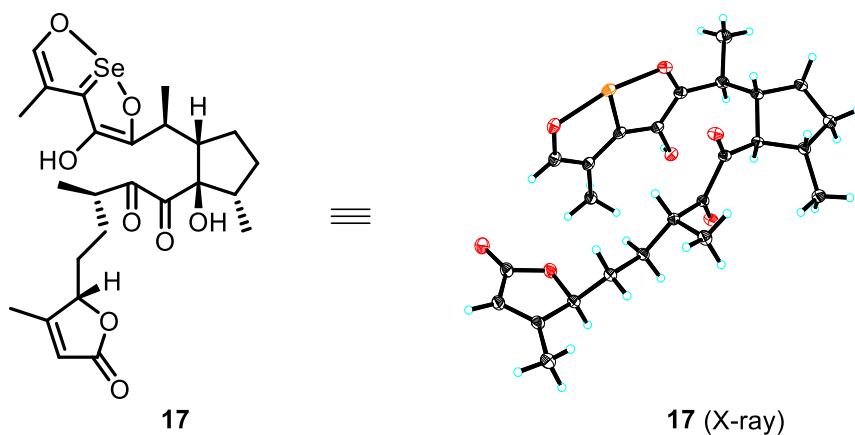

Crystal data for **17**: C<sub>25</sub>H<sub>32</sub>O<sub>7</sub>Se, *M* = 523.46, *a* = 6.4438(2) Å, *b* = 9.1435(2) Å, *c* = 40.8405(11) Å,  $\alpha$  = 90°,  $\beta$  = 90°,  $\gamma$  = 90°, *V* = 2406.28(11) Å<sup>3</sup>, *T* = 100.(2) K, space group *P*212121, *Z* = 4,  $\mu$ (Cu K $\alpha$ ) = 2.476 mm<sup>-1</sup>, 21277 reflections measured, 4724 independent reflections (*R*<sub>int</sub> = 0.0234). The final *R*<sub>*I*</sub> values were 0.0190 (*I* > 2σ(*I*)). The final *wR*(*F*<sup>2</sup>) values were 0.0514 (*I* > 2σ(*I*)). The final *R*<sub>*I*</sub> values were 0.0191 (all data). The final *wR*(*F*<sup>2</sup>) values were 0.0515 (all data). The goodness of fit on *F*<sup>2</sup> was 1.075. Flack parameter = 0.039(4).

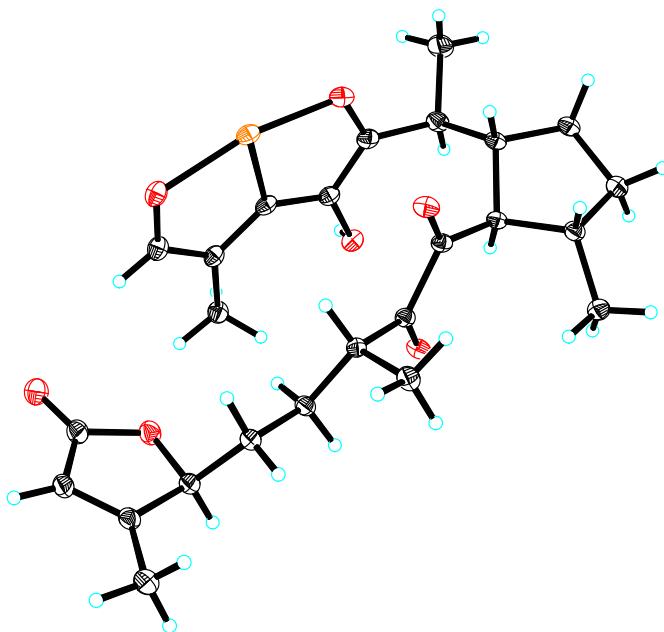

View of a molecule of **17** with the atom-labelling scheme.  
 Displacement ellipsoids are drawn at the 30% probability level.

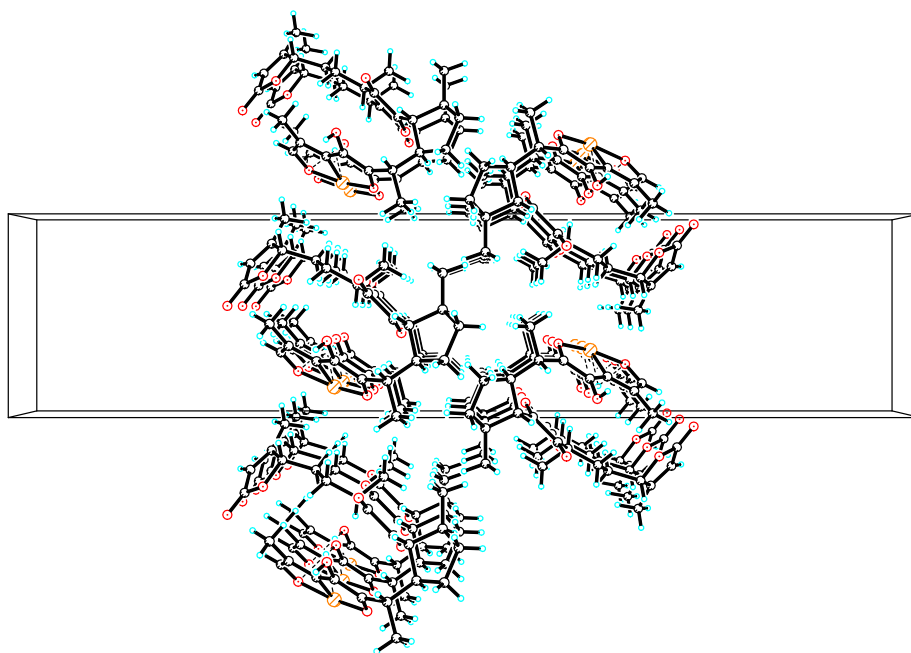

View of the pack drawing of **17**.  
 Hydrogen-bonds are shown as dashed lines.

**Table S2. Crystal data and structure refinement for 17.**

|                                   |                                                   |          |
|-----------------------------------|---------------------------------------------------|----------|
| Identification code               | global                                            |          |
| Empirical formula                 | C <sub>25</sub> H <sub>32</sub> O <sub>7</sub> Se |          |
| Formula weight                    | 523.46                                            |          |
| Temperature                       | 100(2) K                                          |          |
| Wavelength                        | 1.54178 Å                                         |          |
| Crystal system                    | Orthorhombic                                      |          |
| Space group                       | P2 <sub>1</sub> 2 <sub>1</sub> 2 <sub>1</sub>     |          |
| Unit cell dimensions              | a = 6.4438(2) Å                                   | α = 90°. |
|                                   | b = 9.1435(2) Å                                   | β = 90°. |
|                                   | c = 40.8405(11) Å                                 | γ = 90°. |
| Volume                            | 2406.28(11) Å <sup>3</sup>                        |          |
| Z                                 | 4                                                 |          |
| Density (calculated)              | 1.445 Mg/m <sup>3</sup>                           |          |
| Absorption coefficient            | 2.476 mm <sup>-1</sup>                            |          |
| F(000)                            | 1088                                              |          |
| Crystal size                      | 0.350 x 0.120 x 0.070 mm <sup>3</sup>             |          |
| Theta range for data collection   | 2.16 to 72.37°.                                   |          |
| Index ranges                      | -7 ≤ h ≤ 7, -11 ≤ k ≤ 10, -50 ≤ l ≤ 50            |          |
| Reflections collected             | 21277                                             |          |
| Independent reflections           | 4724 [R(int) = 0.0234]                            |          |
| Completeness to theta = 72.37°    | 99.9 %                                            |          |
| Absorption correction             | Semi-empirical from equivalents                   |          |
| Max. and min. transmission        | 0.85 and 0.51                                     |          |
| Refinement method                 | Full-matrix least-squares on F <sup>2</sup>       |          |
| Data / restraints / parameters    | 4724 / 0 / 305                                    |          |
| Goodness-of-fit on F <sup>2</sup> | 1.075                                             |          |
| Final R indices [I > 2σ(I)]       | R1 = 0.0190, wR2 = 0.0514                         |          |
| R indices (all data)              | R1 = 0.0191, wR2 = 0.0515                         |          |
| Absolute structure parameter      | 0.039(4)                                          |          |
| Largest diff. peak and hole       | 0.257 and -0.222 e.Å <sup>-3</sup>                |          |

#### 4. Immunosuppressive Activity Analysis

Splenocytes were purified from the spleens of female C57BL/6 mice (6–8 weeks old, sacrificed by cervical dislocation) and cultured in RPMI 1640 medium containing 10% FBS, penicillin (100 U/mL), and streptomycin (100 µg/mL) at 37 °C with 5% CO<sub>2</sub>. T cells ( $4 \times 10^5$  cells/well) were cultured in 96-well plates in the presence of anti-CD3 mAb (5 µg/mL) and anti-CD4 mAb (2 µg/mL) for 48 hours with the indicated concentrations (40, 20, 10, 5, and 2.5 µM) of each tested compound. Cyclosporin A (CsA) was used as the positive control. Absorbance values at 450 nm were measured using a micro-plate reader (Molecular Devices). Inhibitory rates were calculated according to the following formula: inhibitory rate =  $[1 - (\text{Asample} - \text{Ablank})/(\text{Asolvent} - \text{Ablank})] \times 100\%$ . IC<sub>50</sub> values were analyzed by log(inhibitor) vs. normalized response – Variable slope using Prism 8.0 software.

**Table S3. Inhibitory Effects of Se-containing Compounds and Leucosceptroids on IFN-γ Secretion of Mouse Splenocytes Induced by Anti-CD3/CD4 Monoclonal Antibodies.**

| Compound         | Inhibition rate (%) <sup>a</sup> | IC <sub>50</sub> (µM) |
|------------------|----------------------------------|-----------------------|
| <b>10</b>        | 55.63 ± 5.86                     | 5.29                  |
| <b>11</b>        | 77.27 ± 3.39                     | 17.60                 |
| <b>14</b>        | < 10                             | -                     |
| <b>17</b>        | 28.09 ± 5.41                     | -                     |
| Leucosceptroid A | 17.69 ± 6.58                     | -                     |
| Leucosceptroid G | 16.63 ± 4.94                     | -                     |
| Leucosceptroid N | 54.32 ± 6.05                     | 9.94                  |
| CsA <sup>b</sup> | 67.31 ± 1.38                     | 2.45 nM               |

<sup>a</sup>Inhibitory rate was performed at the concentration of 20 µM. <sup>b</sup>Cyclosporine A (CsA) was coassayed as a positive control of T cells at the test concentration of 4 nM.

## 5. Copies of $^1\text{H}$ and $^{13}\text{C}$ NMR Spectra

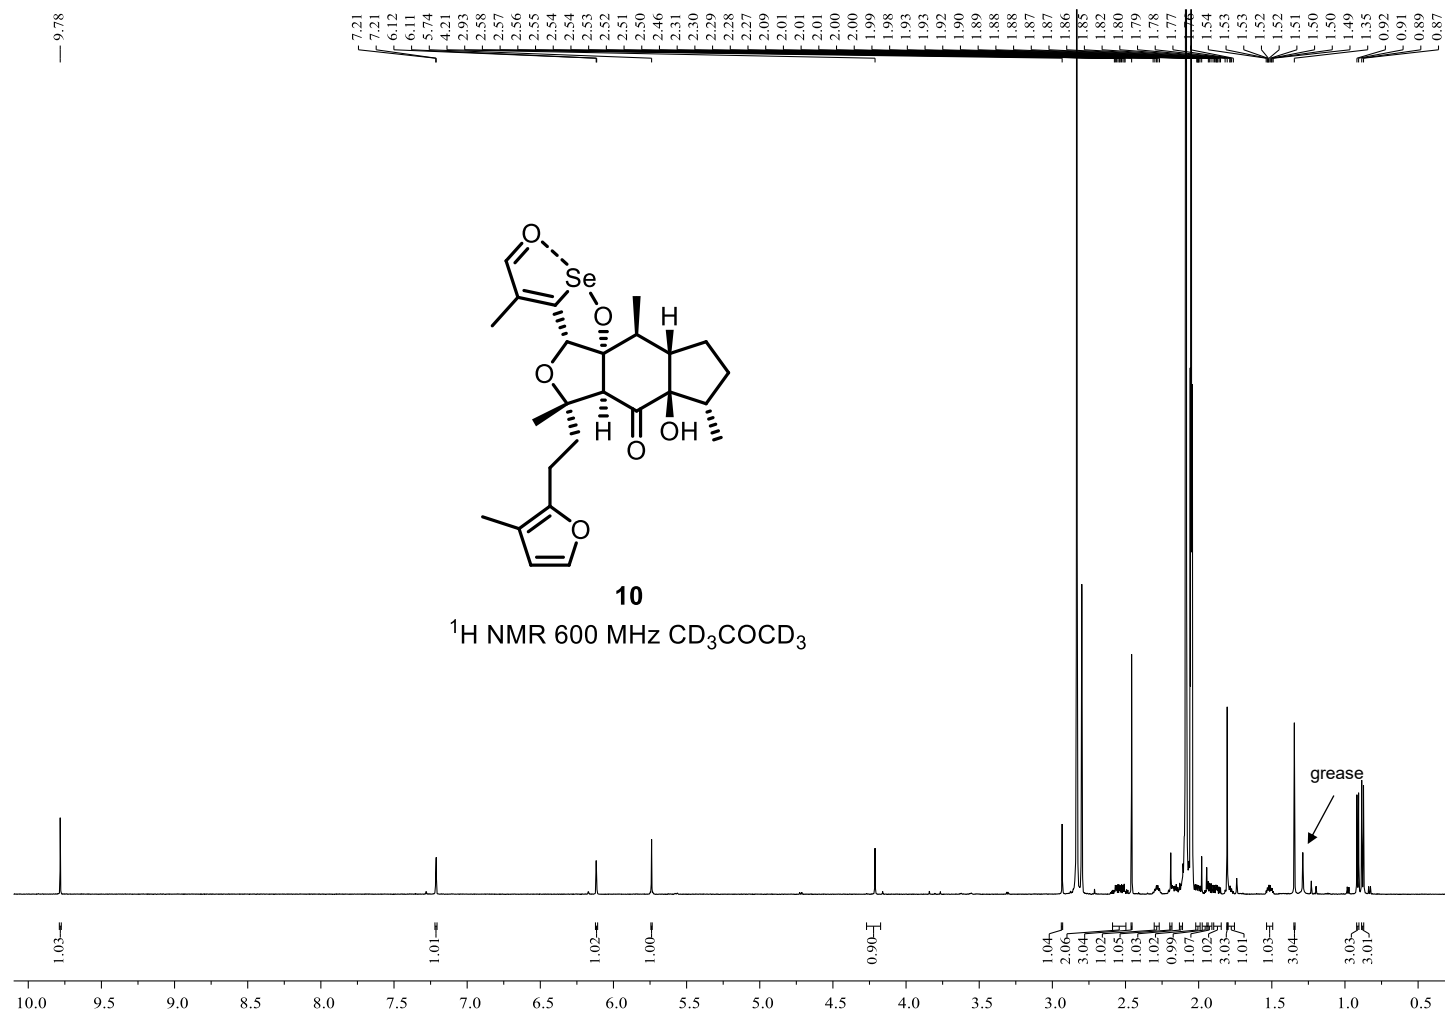

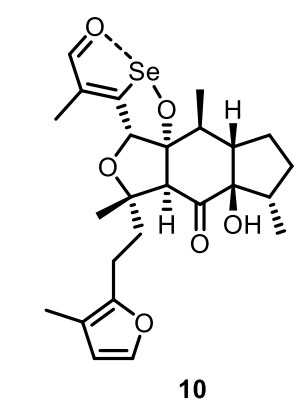

$^{13}\text{C}$  NMR 151 MHz  $\text{CD}_3\text{COCD}_3$

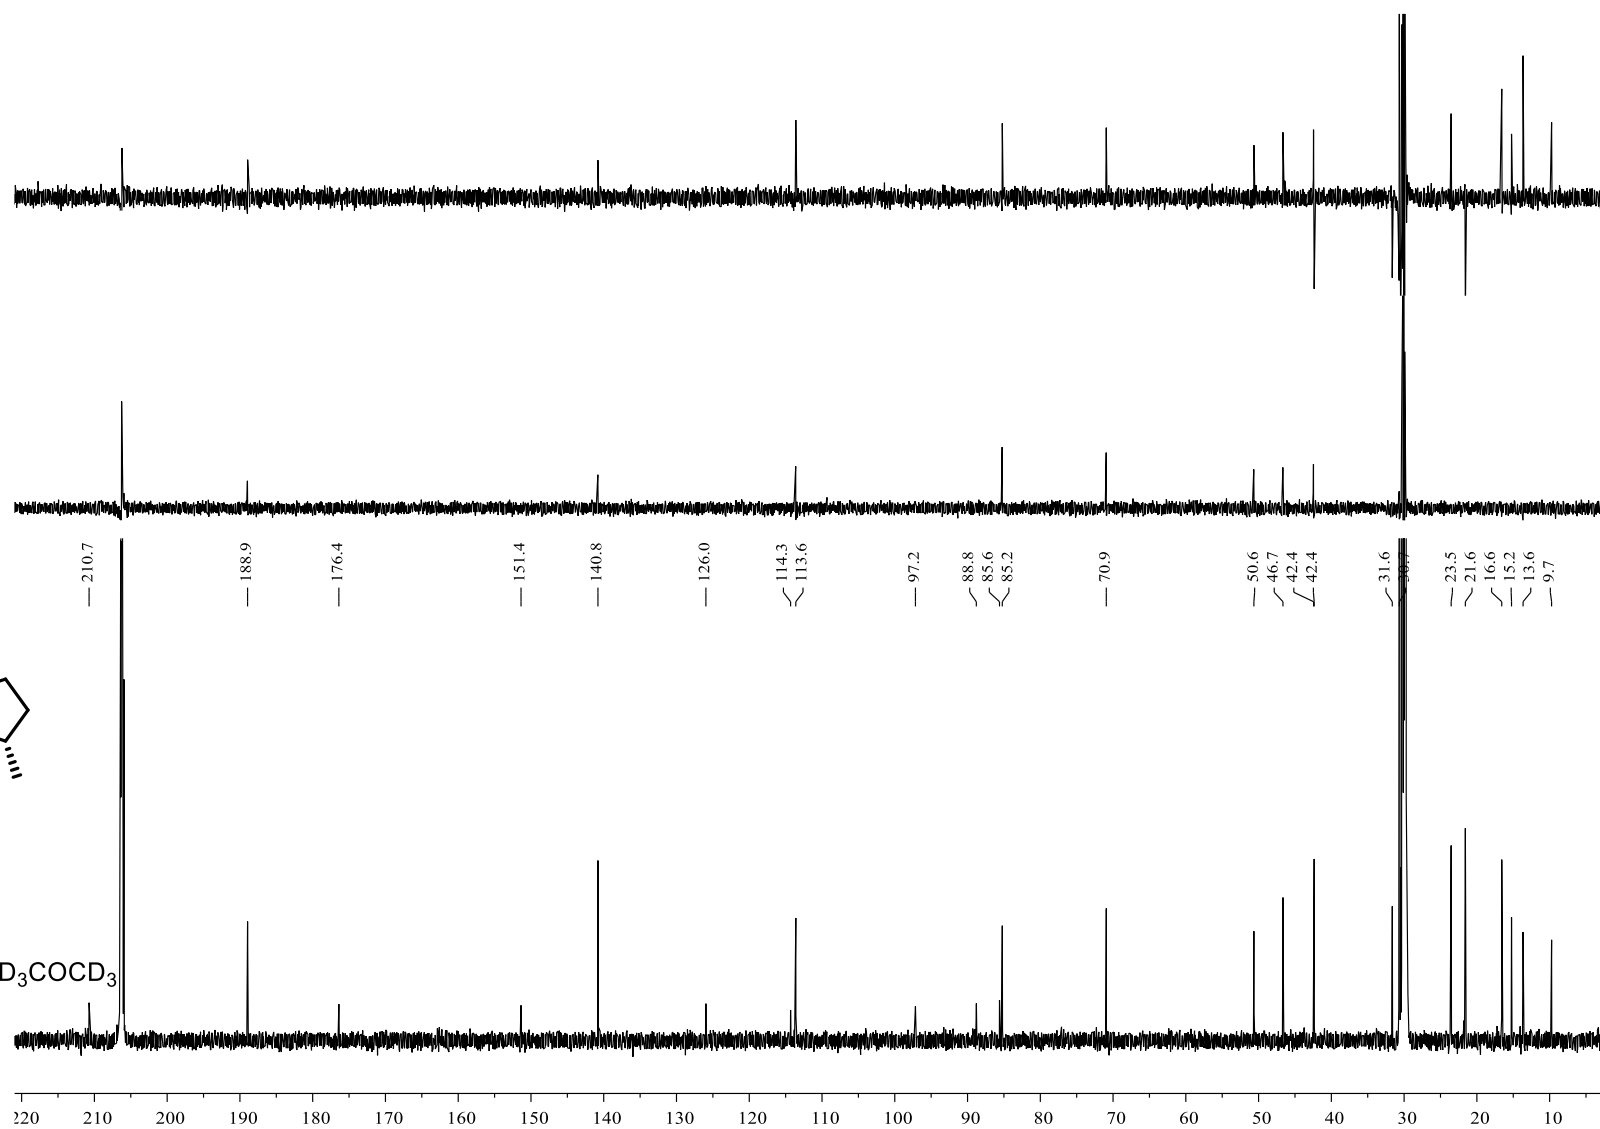

**10**  
 $^1\text{H}$ - $^1\text{H}$  COSY spectrum in  $\text{CD}_3\text{COCD}_3$

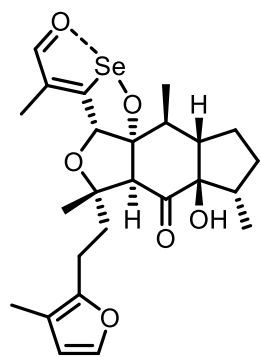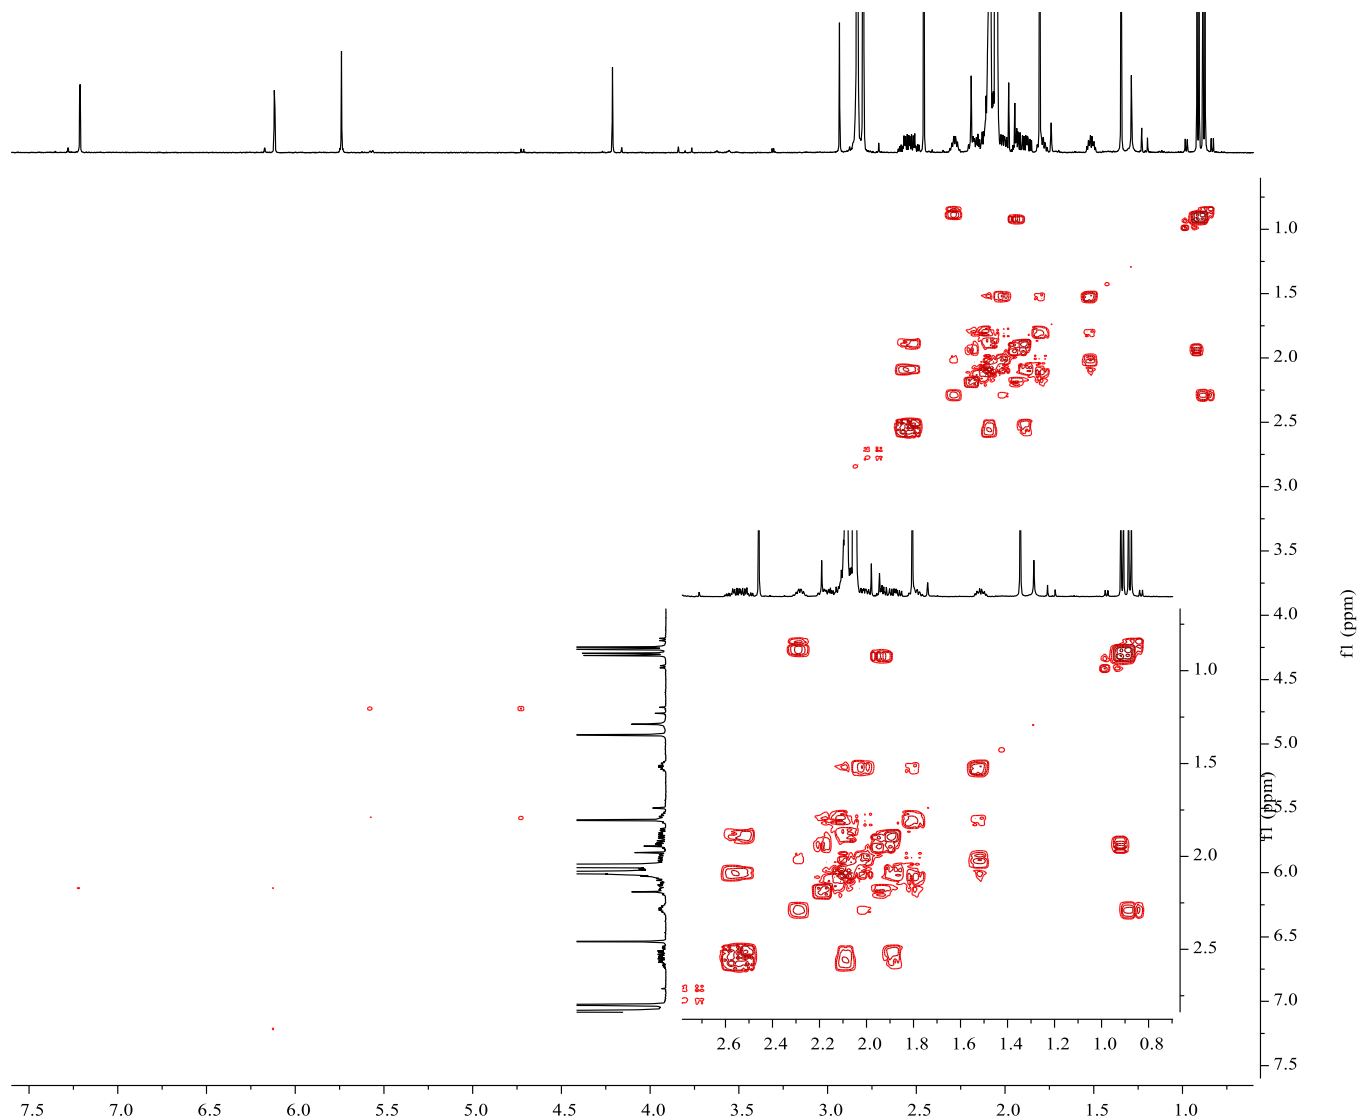

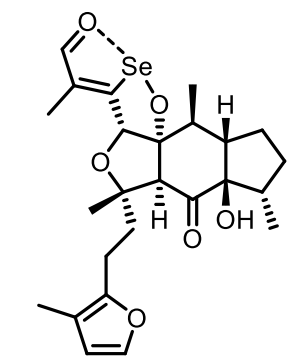

**10**

HSQC spectrum in  $\text{CD}_3\text{COCD}_3$

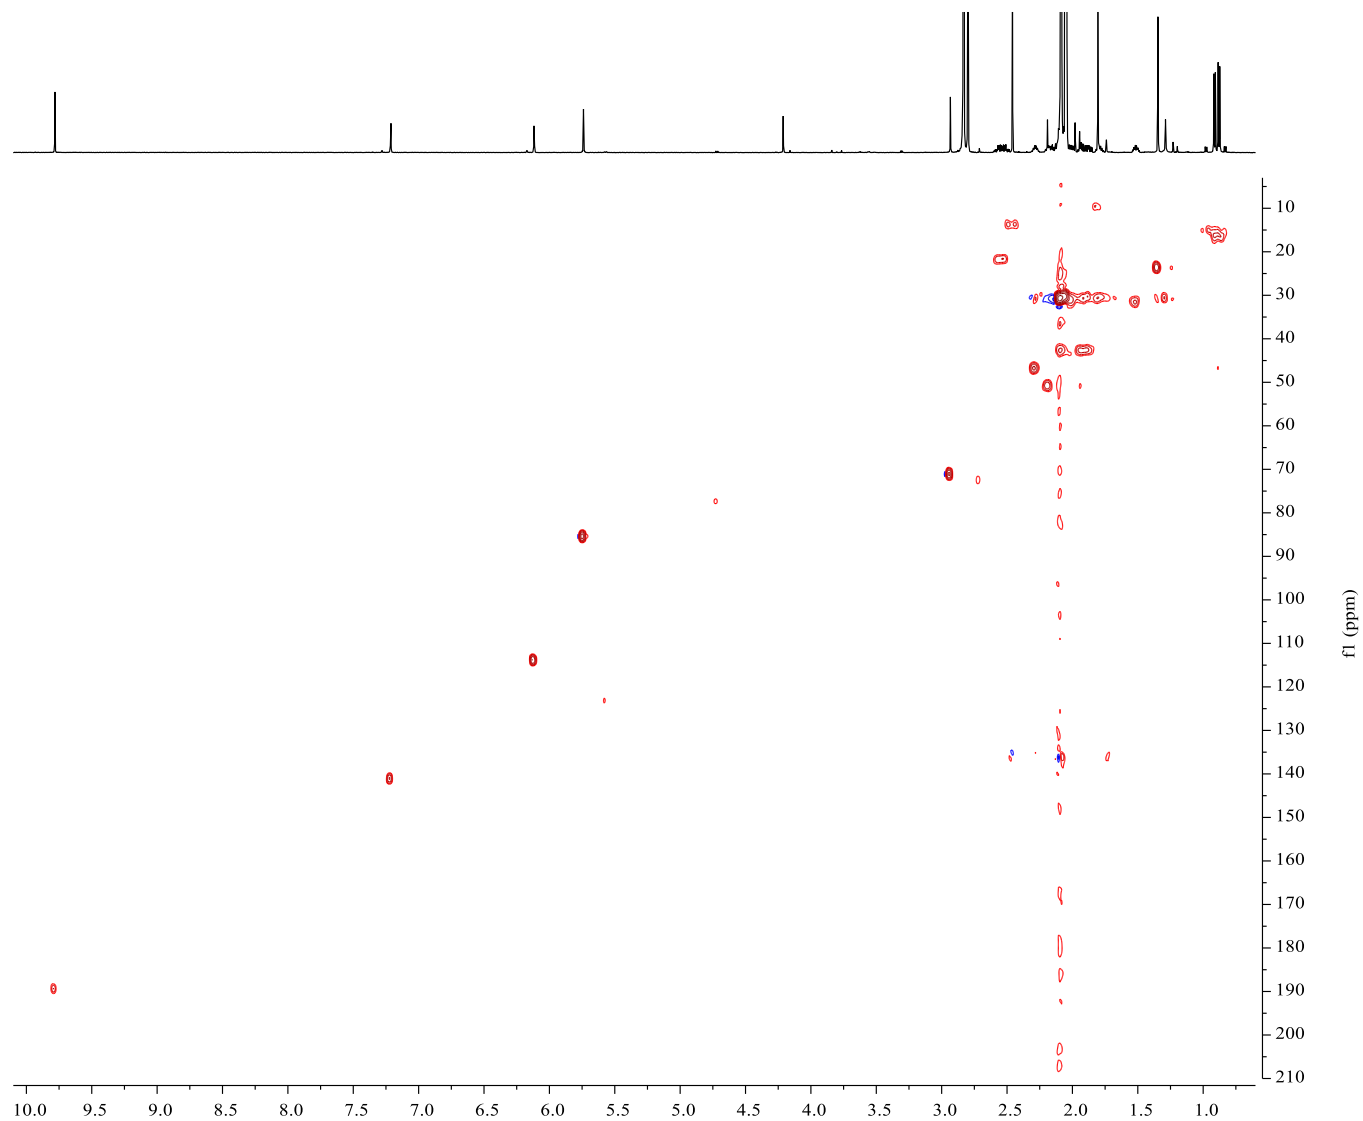

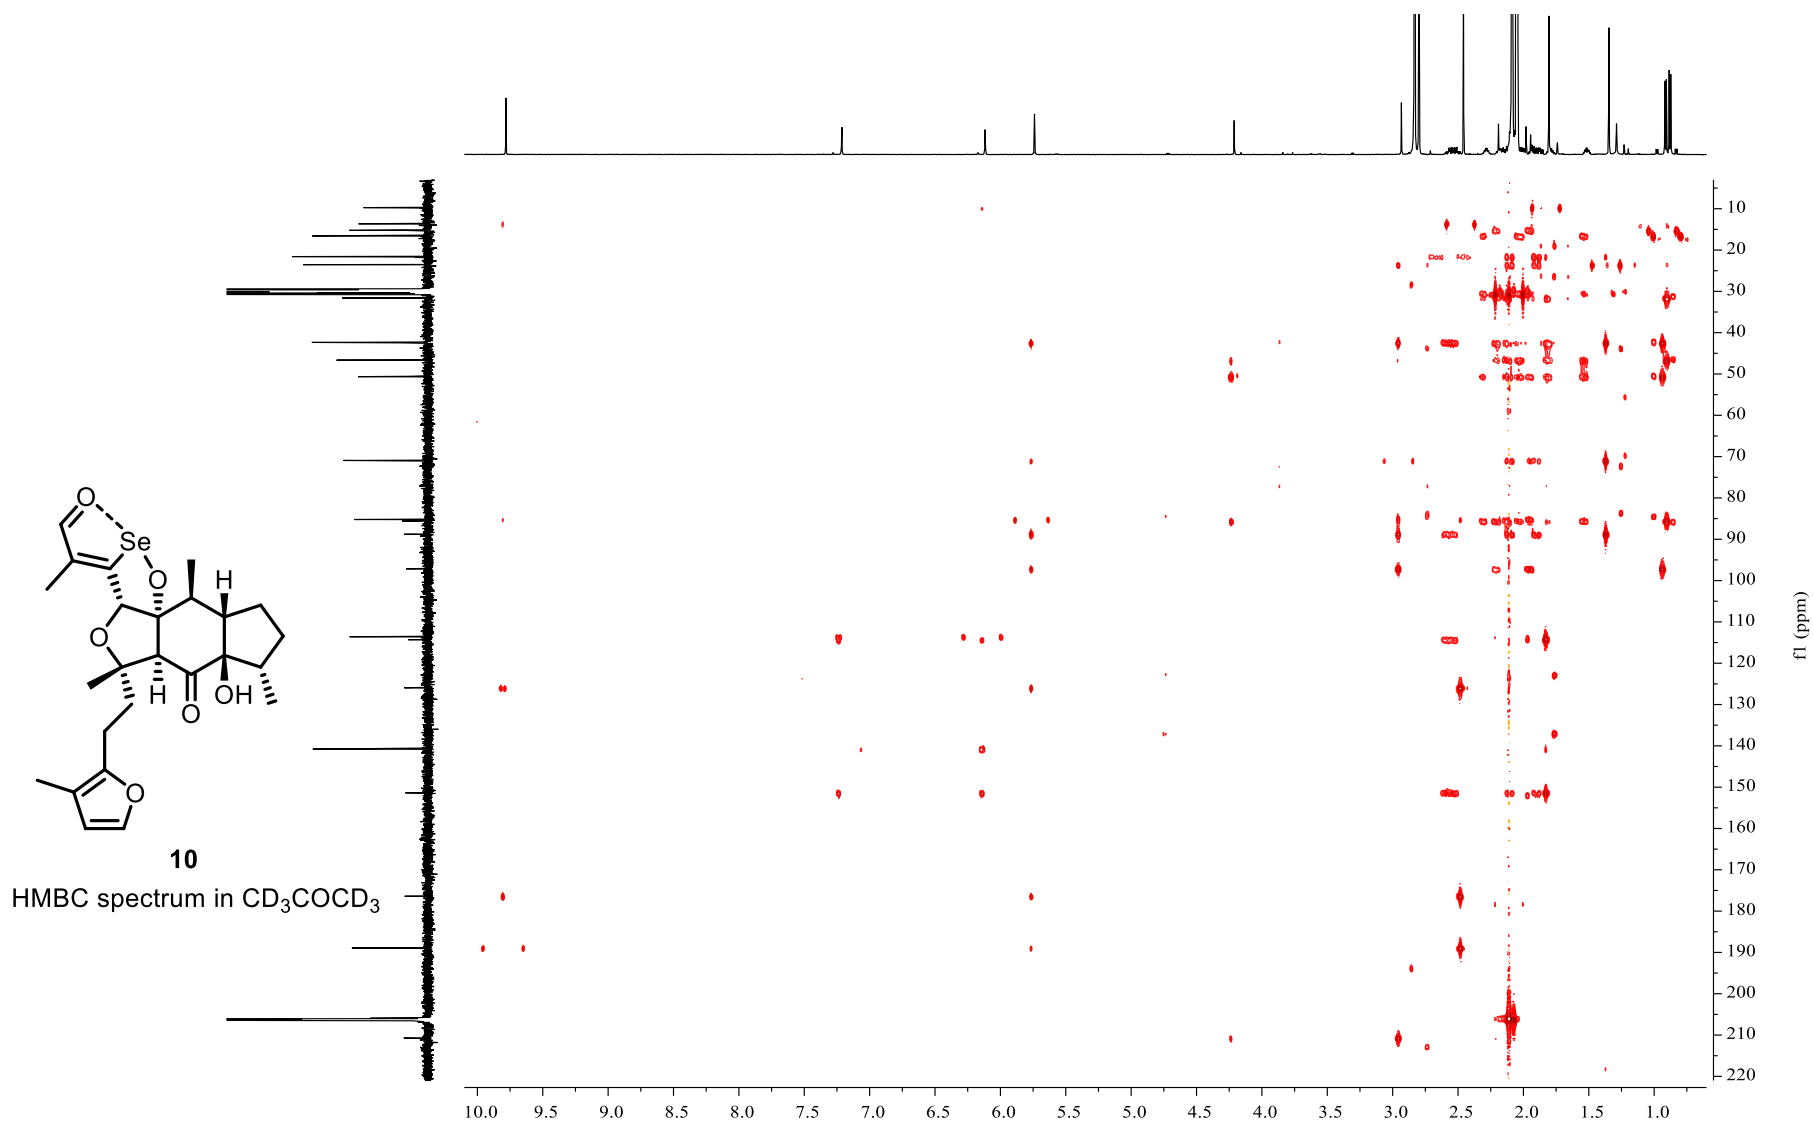

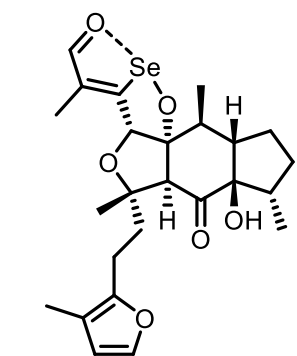

**10**

ROESY spectrum in  $\text{CD}_3\text{COCD}_3$

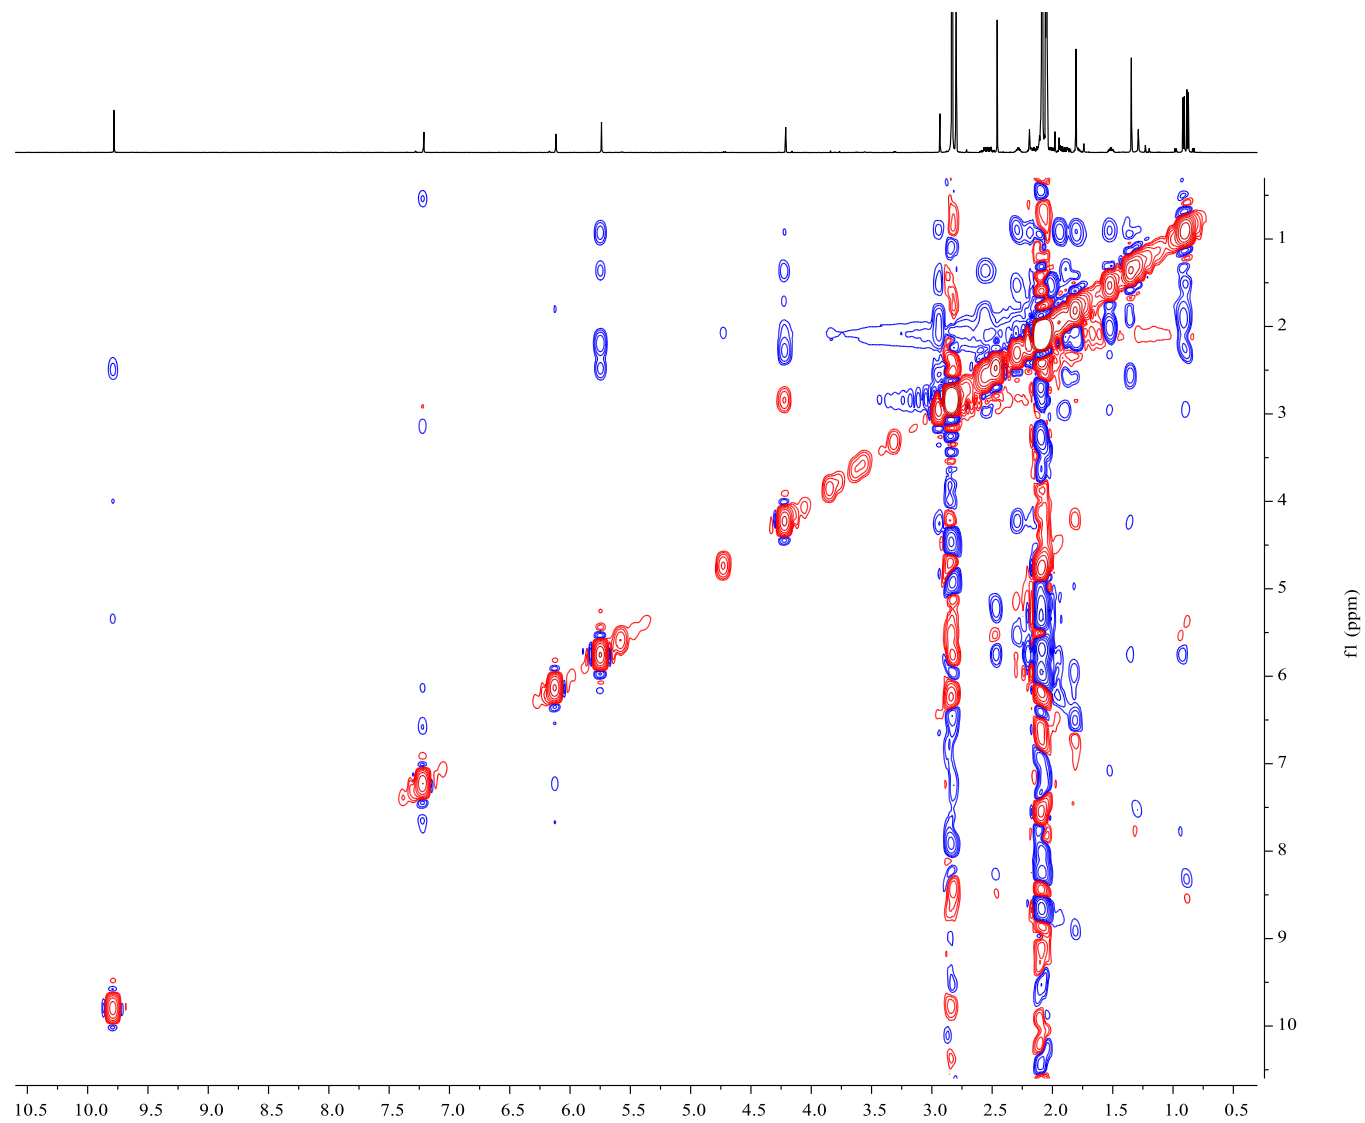

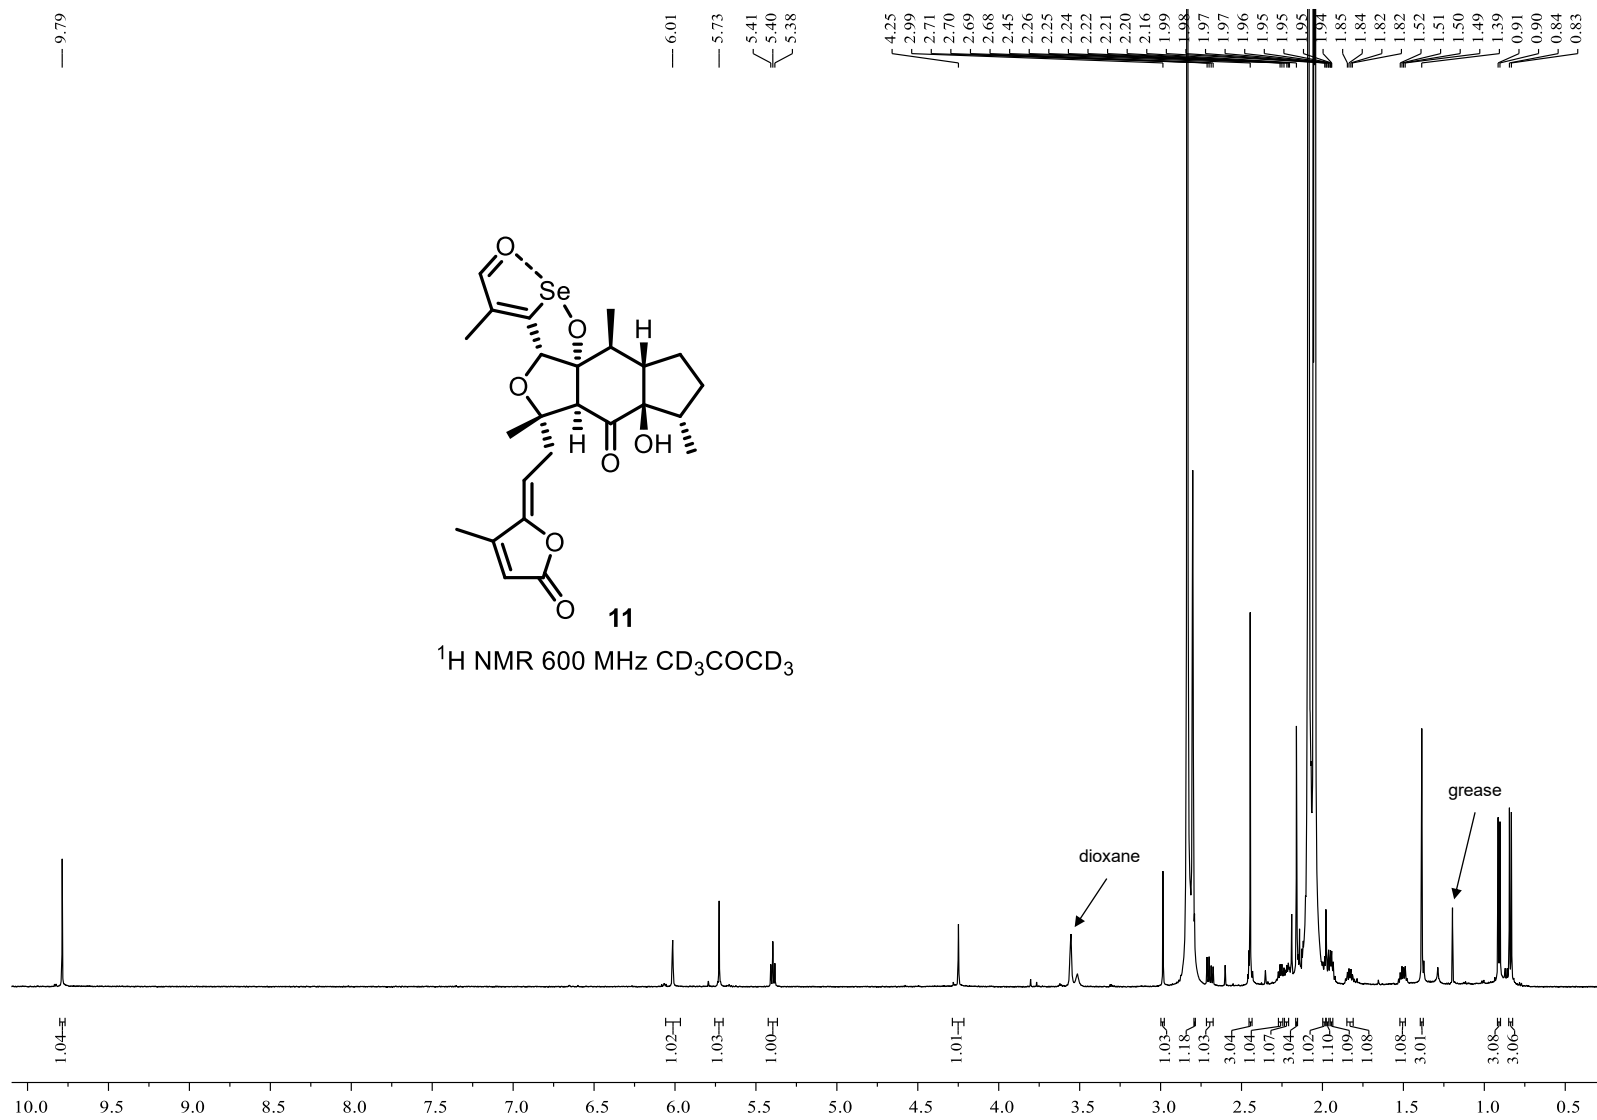

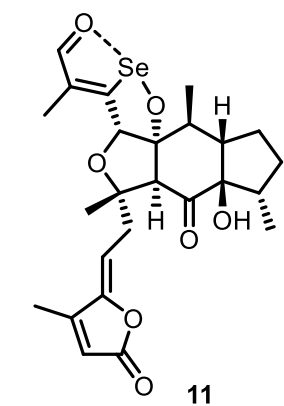

$^{13}\text{C}$  NMR 151 MHz  $\text{CD}_3\text{COCD}_3$

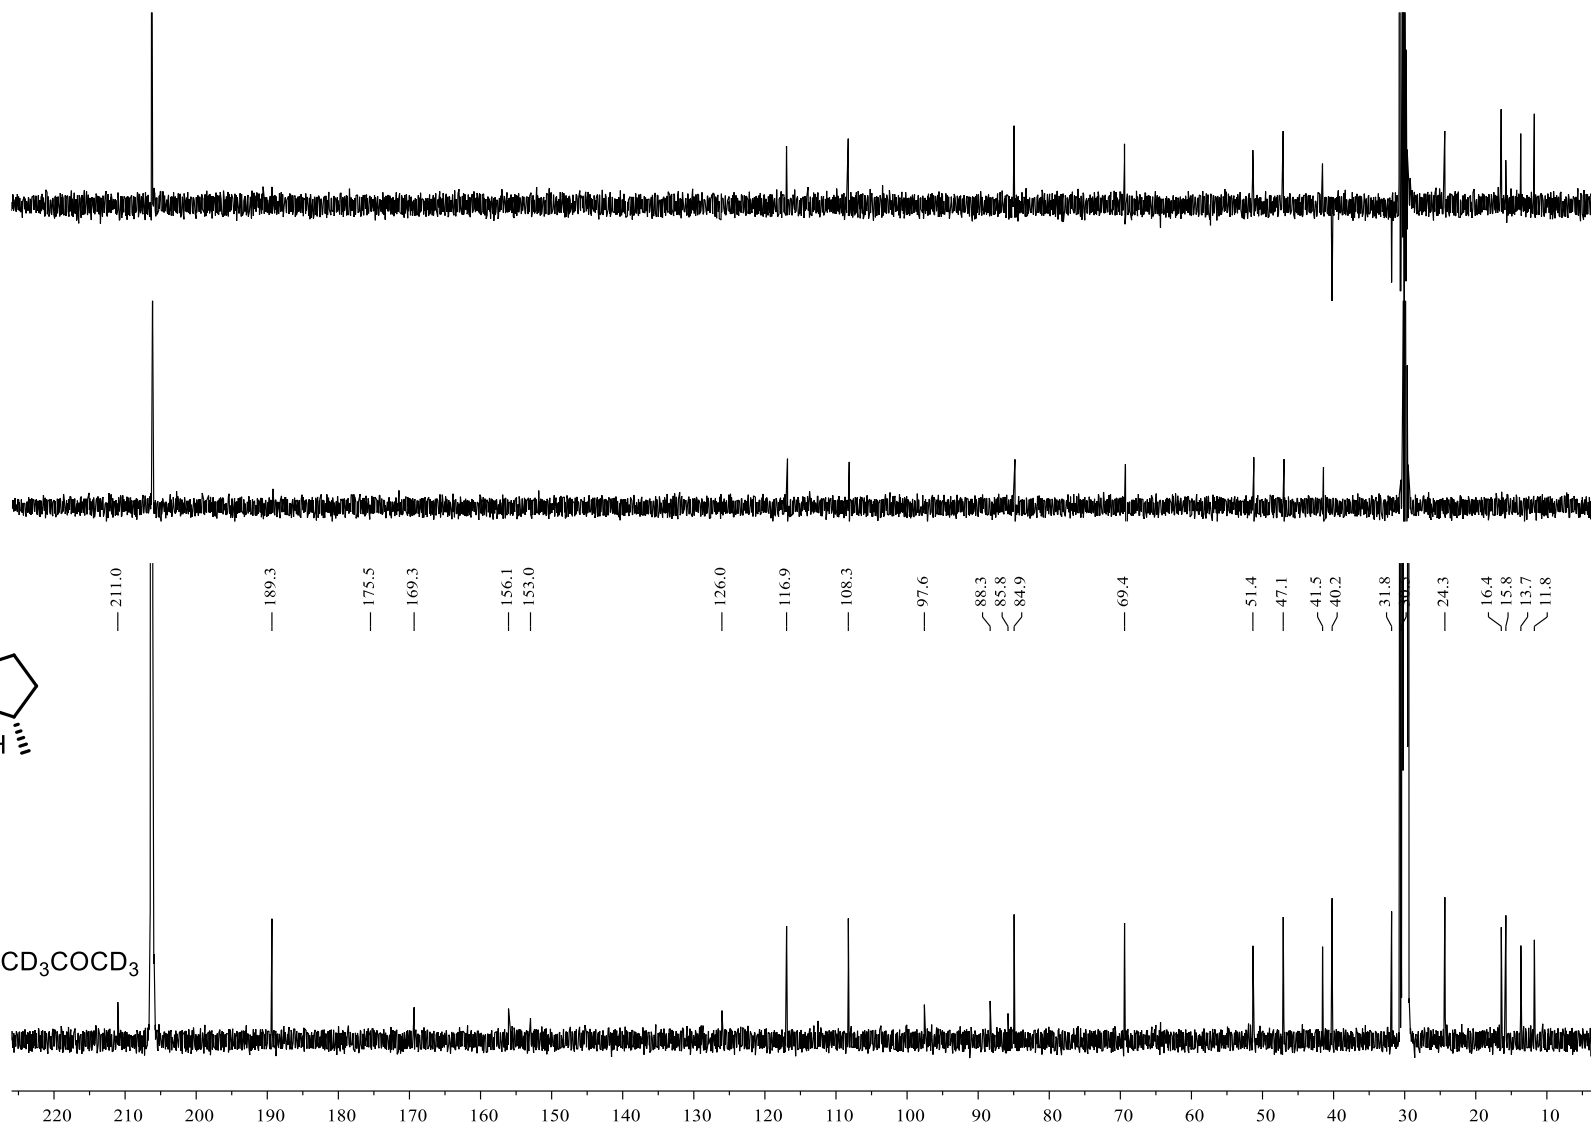

<sup>1</sup>H-<sup>1</sup>H COSY spectrum in CD<sub>3</sub>COCD<sub>3</sub>

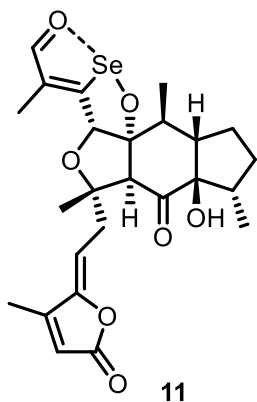

11

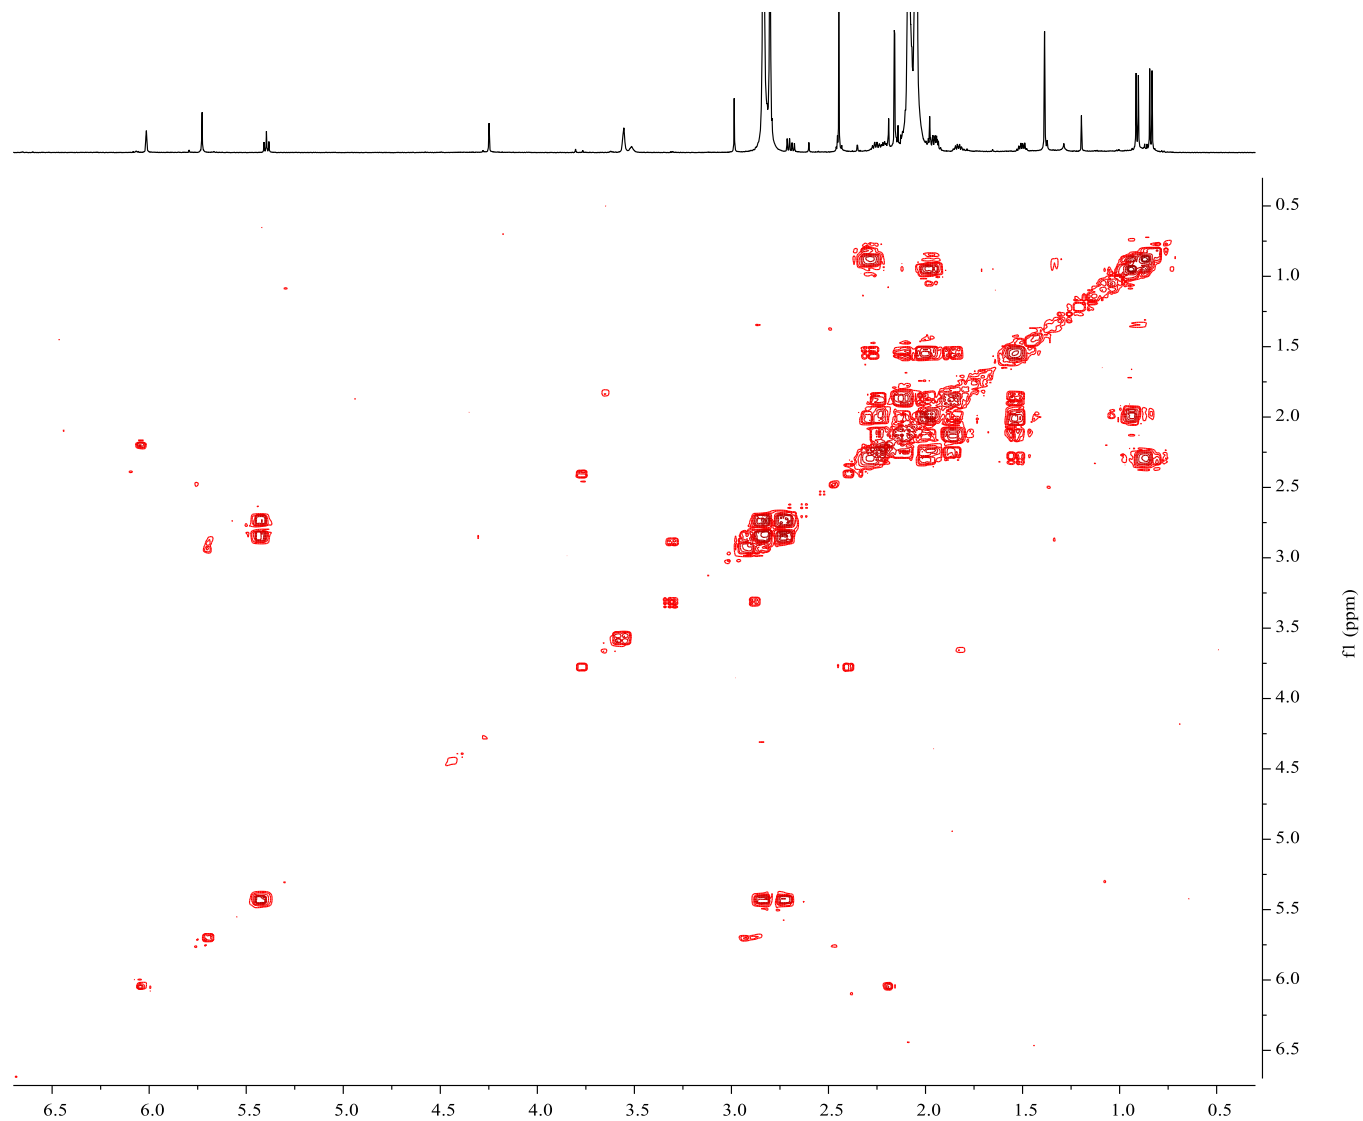

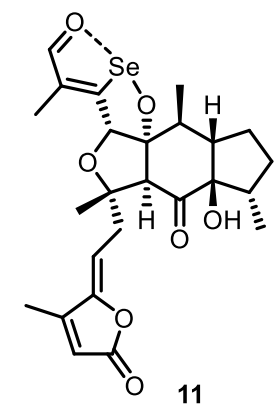

**11**

HSQC spectrum in  $\text{CD}_3\text{COCD}_3$

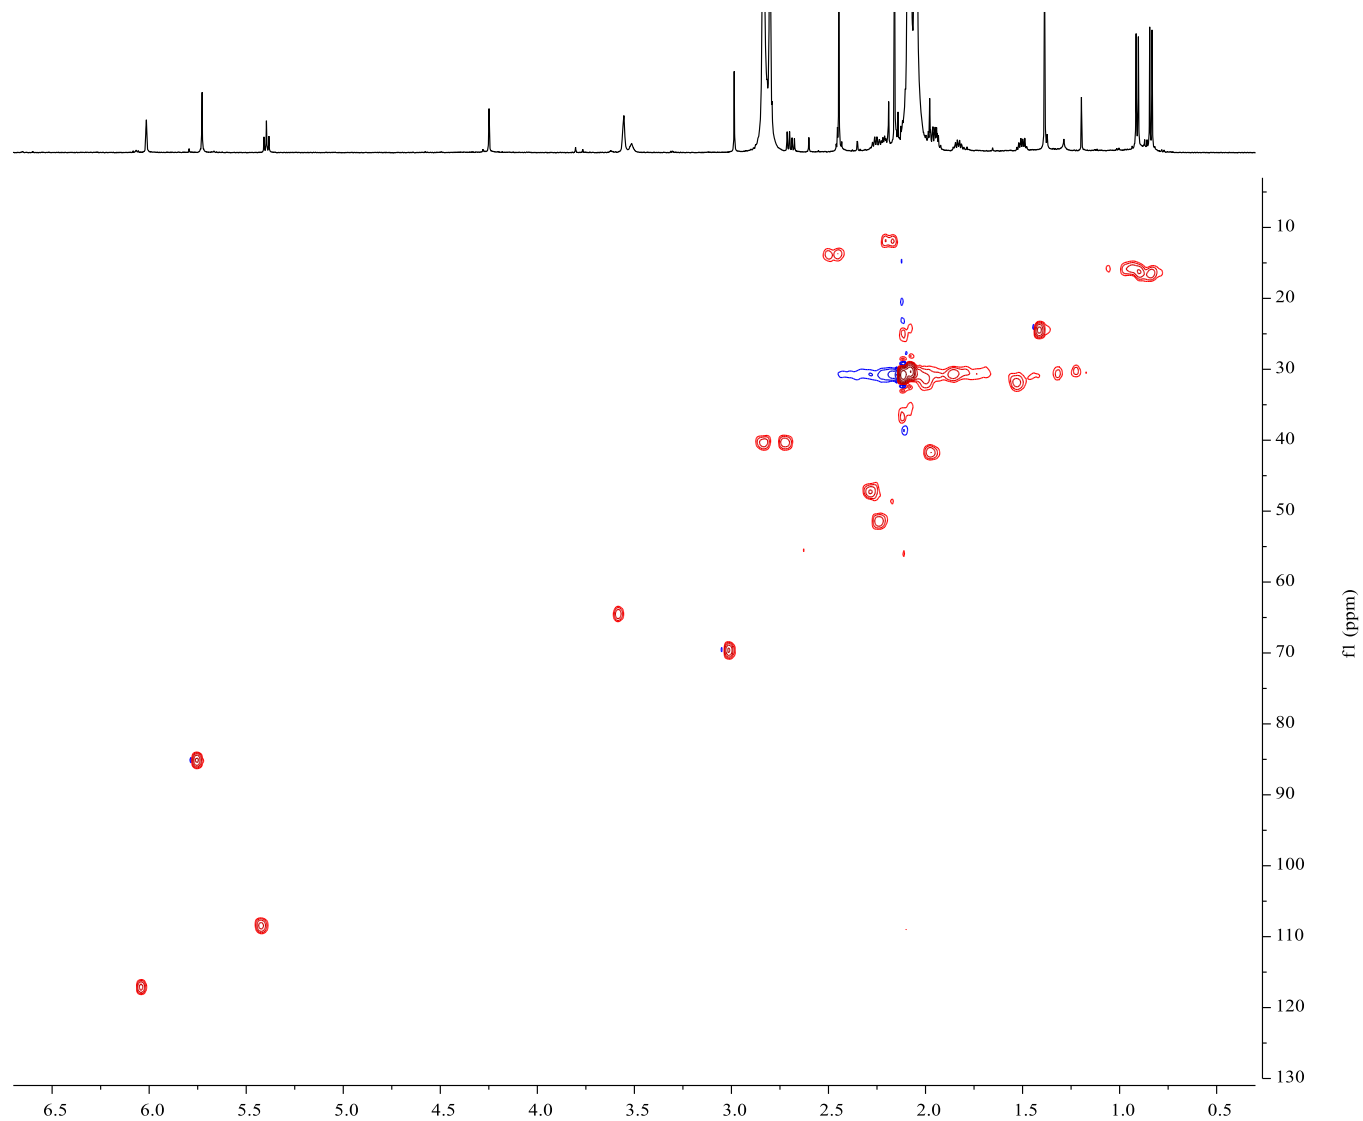

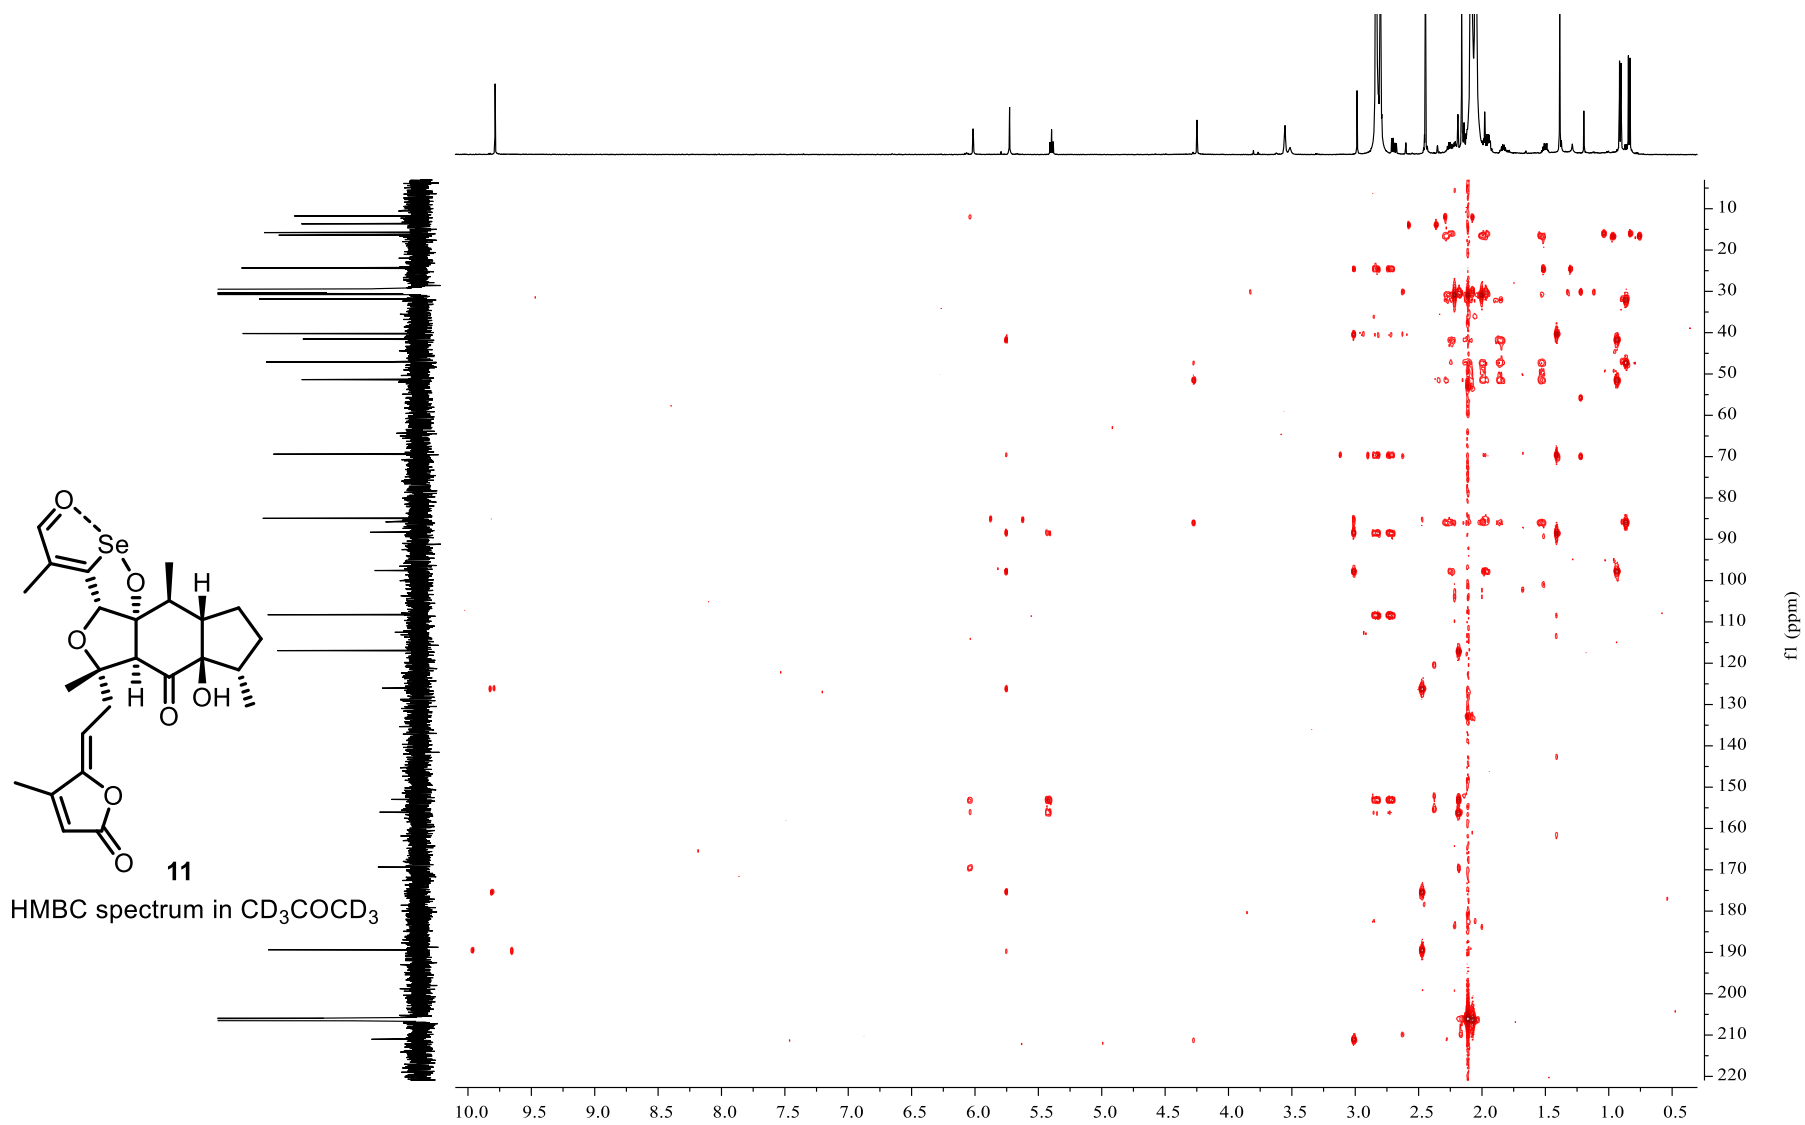

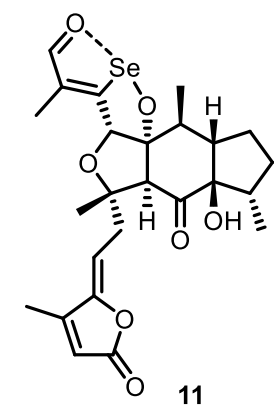

**11**

ROESY spectrum in  $\text{CD}_3\text{COCD}_3$

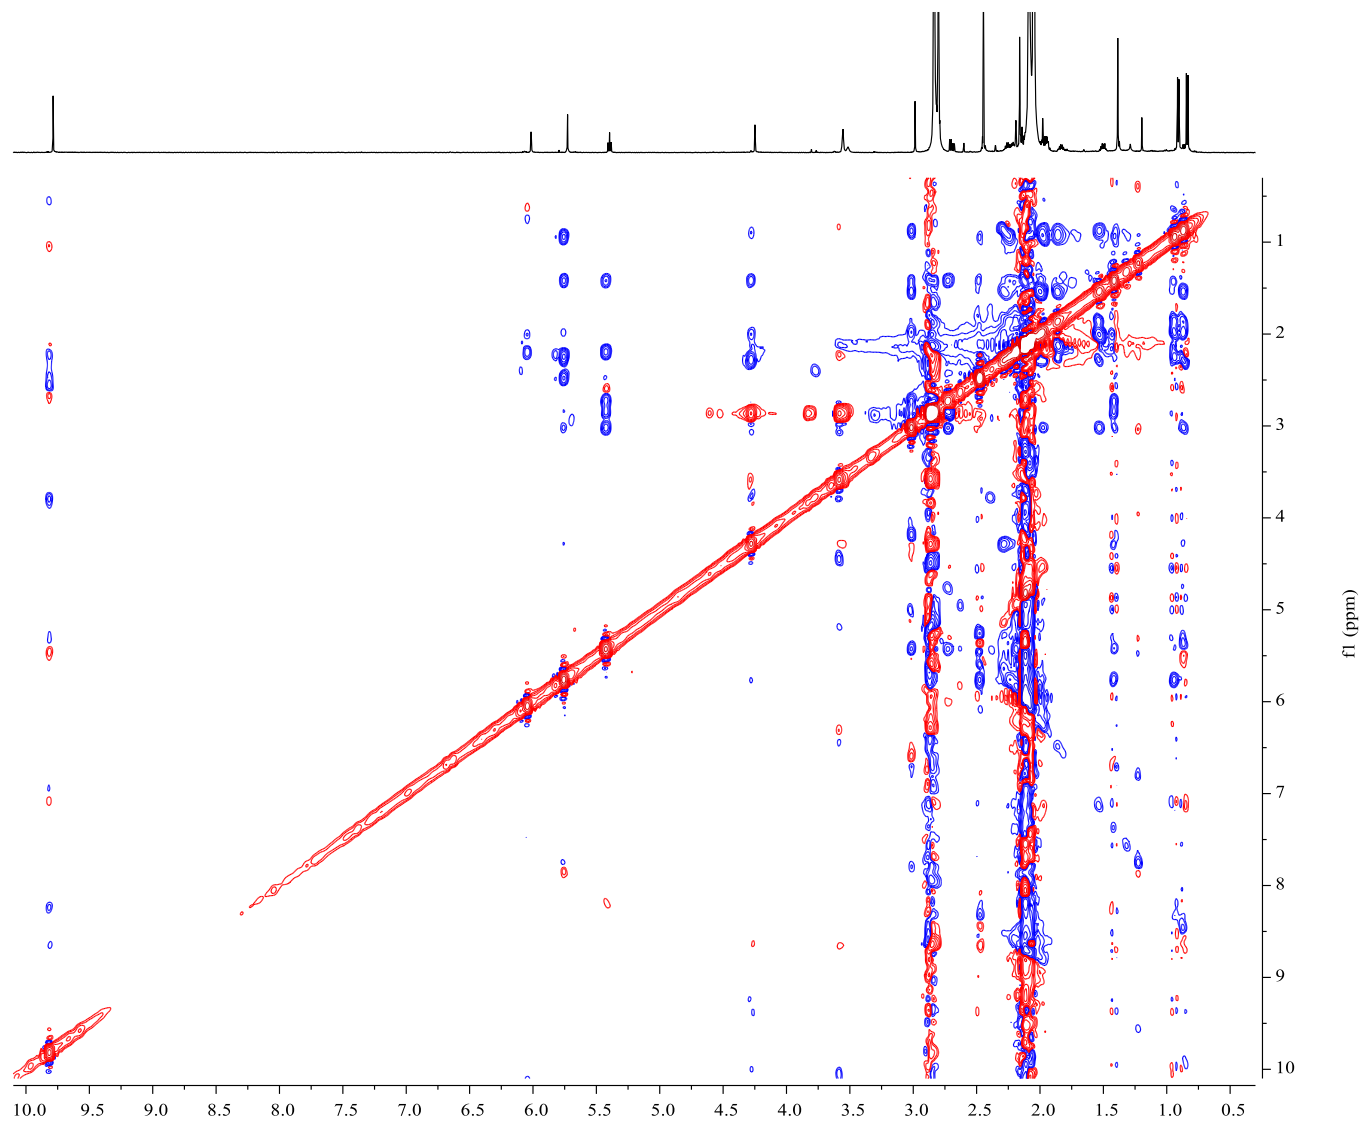

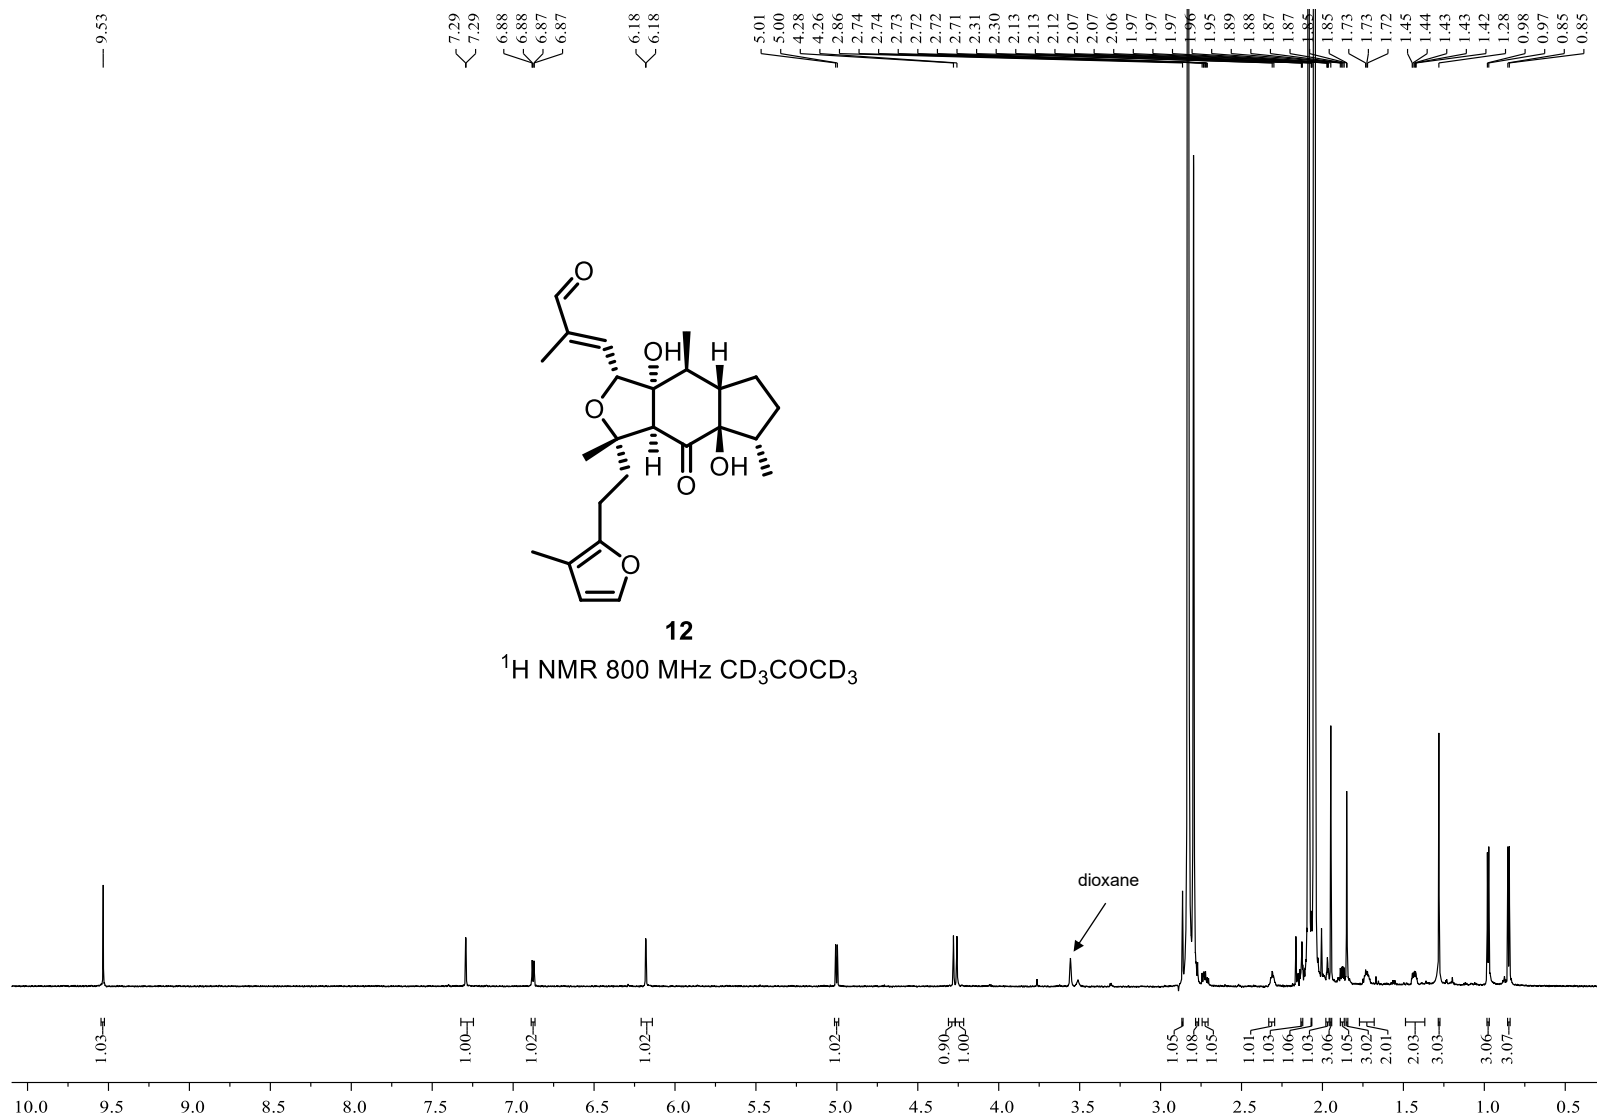

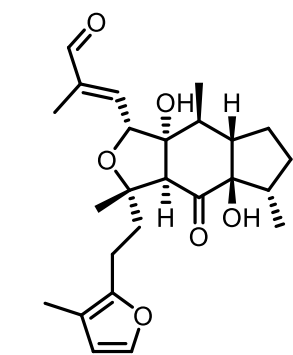

**12**

$^{13}\text{C}$  NMR 201 MHz  $\text{CD}_3\text{COCD}_3$

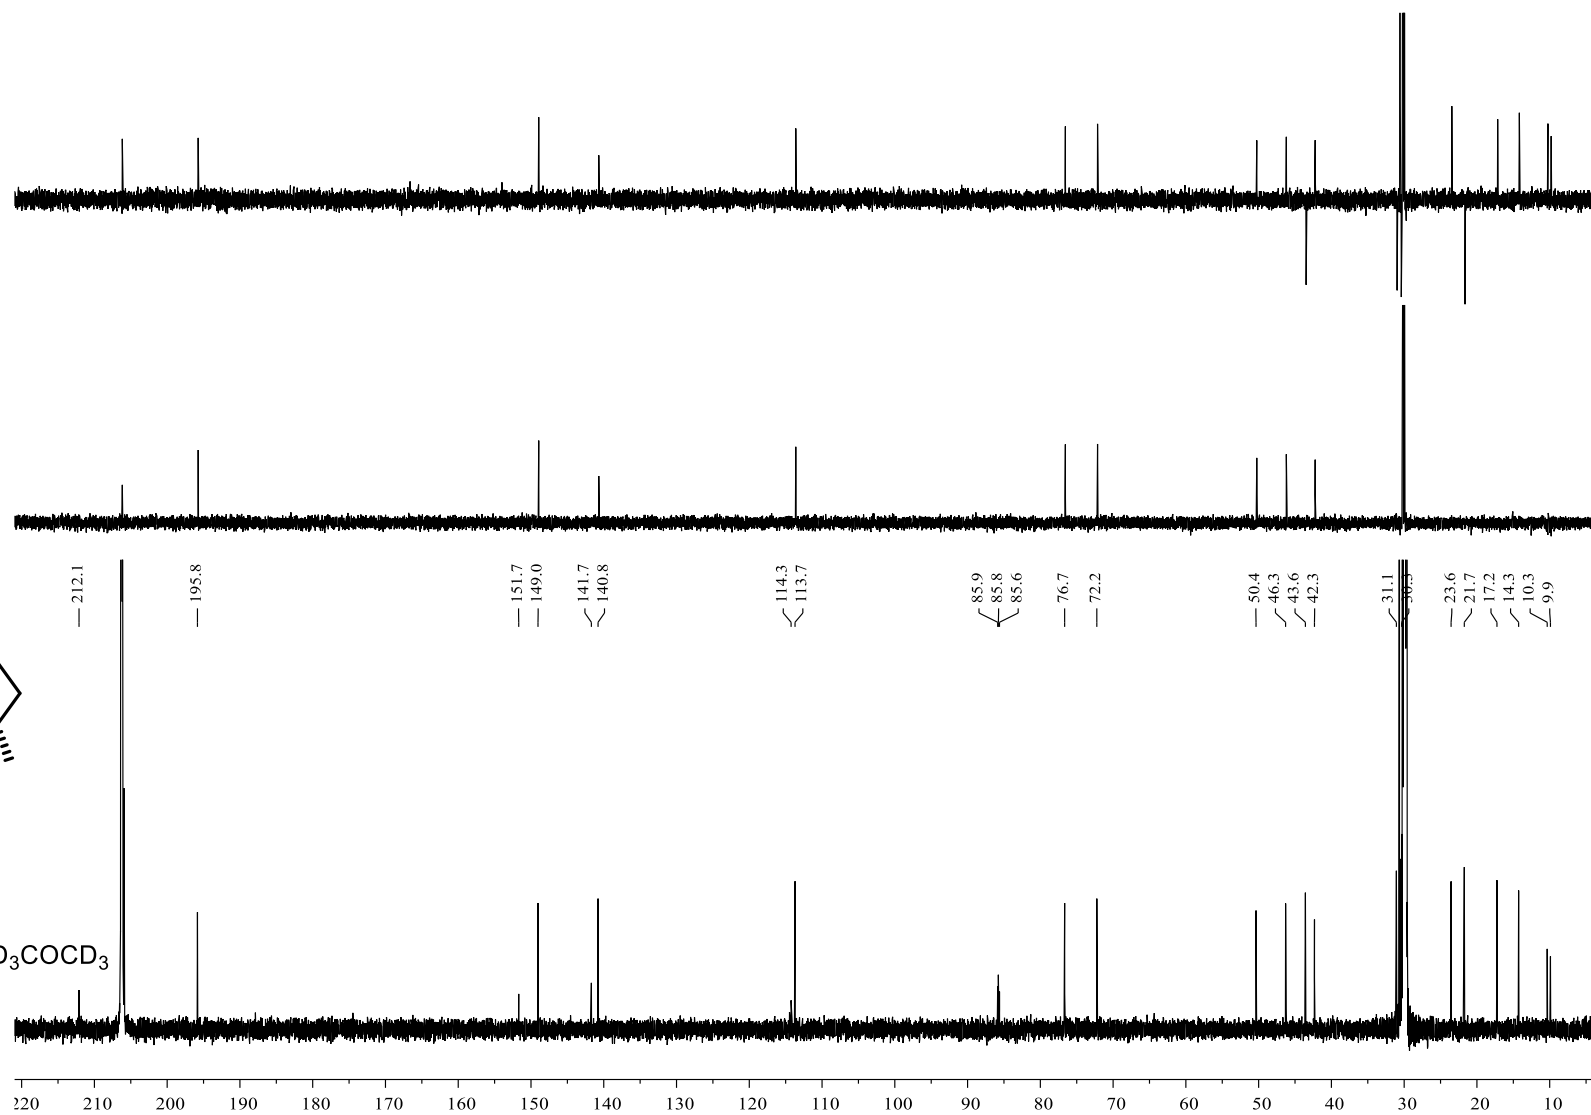

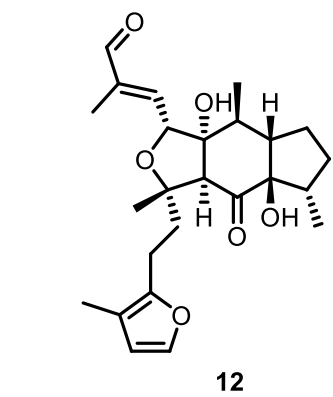

$^1\text{H}$ - $^1\text{H}$  COSY spectrum in  $\text{CD}_3\text{COCD}_3$

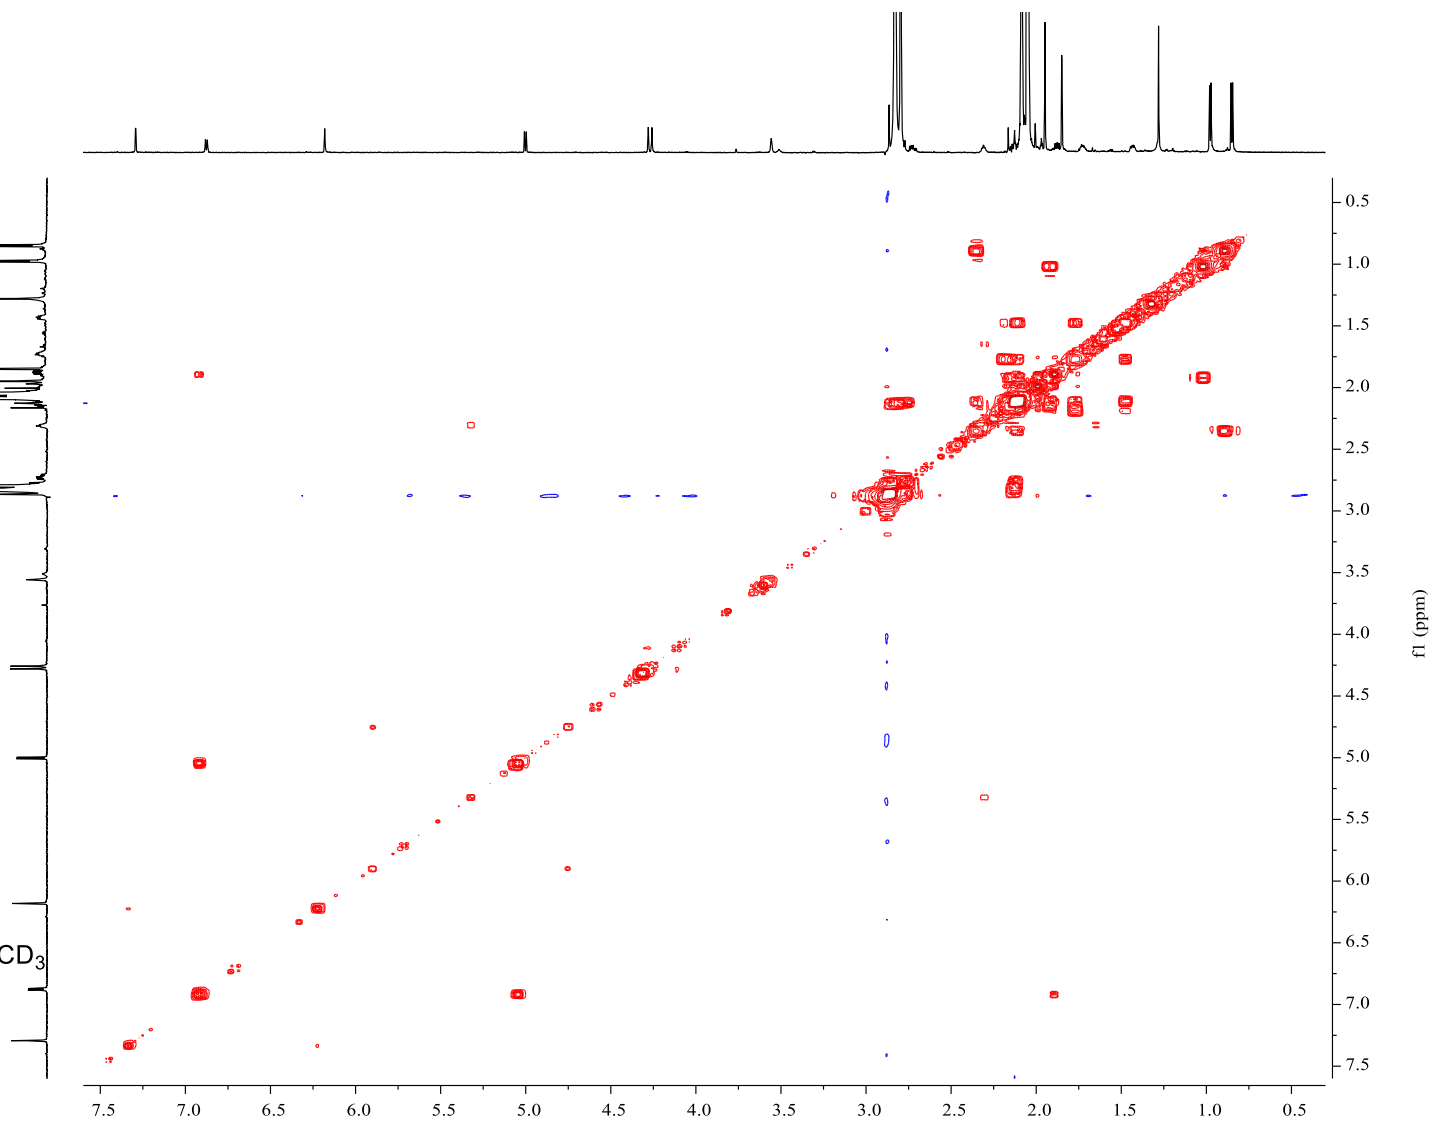

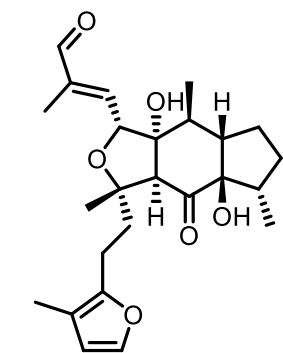

**12**

HSQC spectrum in  $\text{CD}_3\text{COCD}_3$

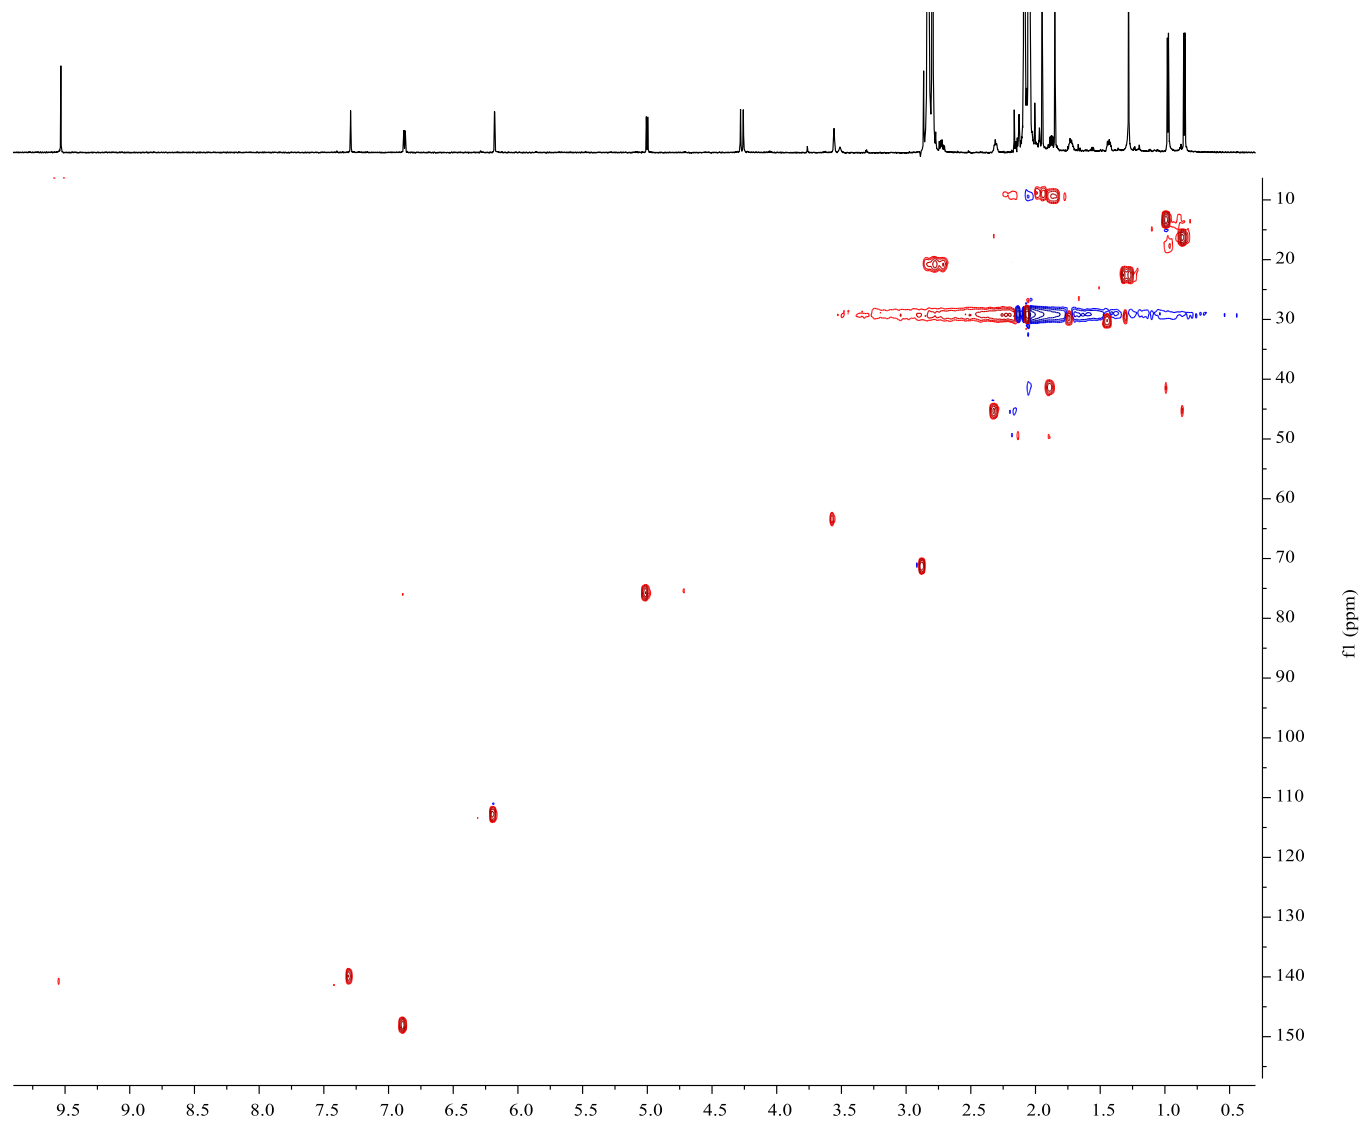

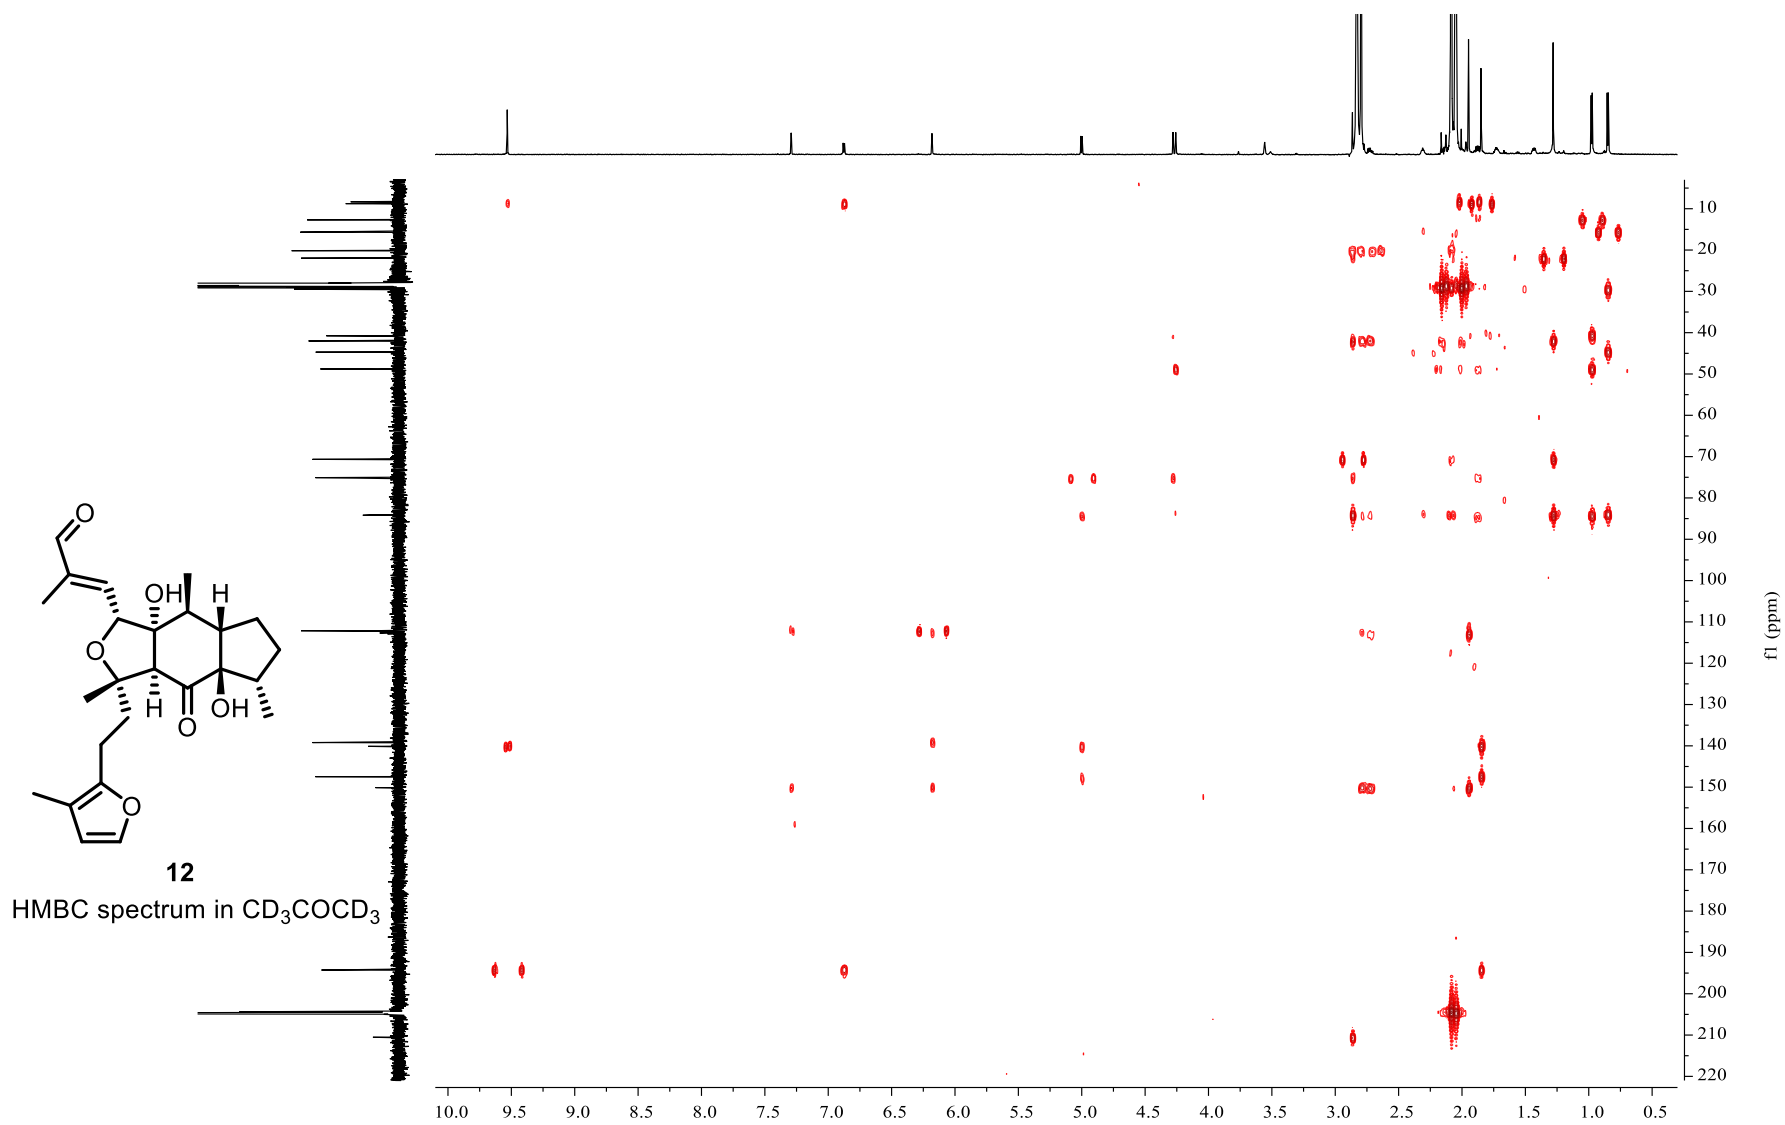

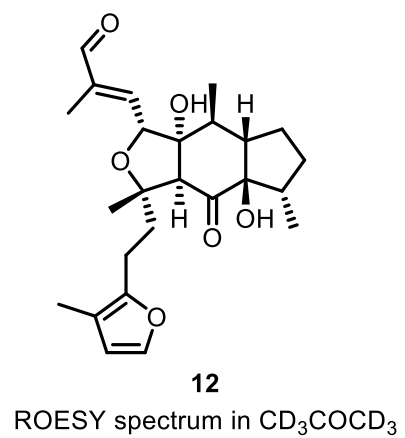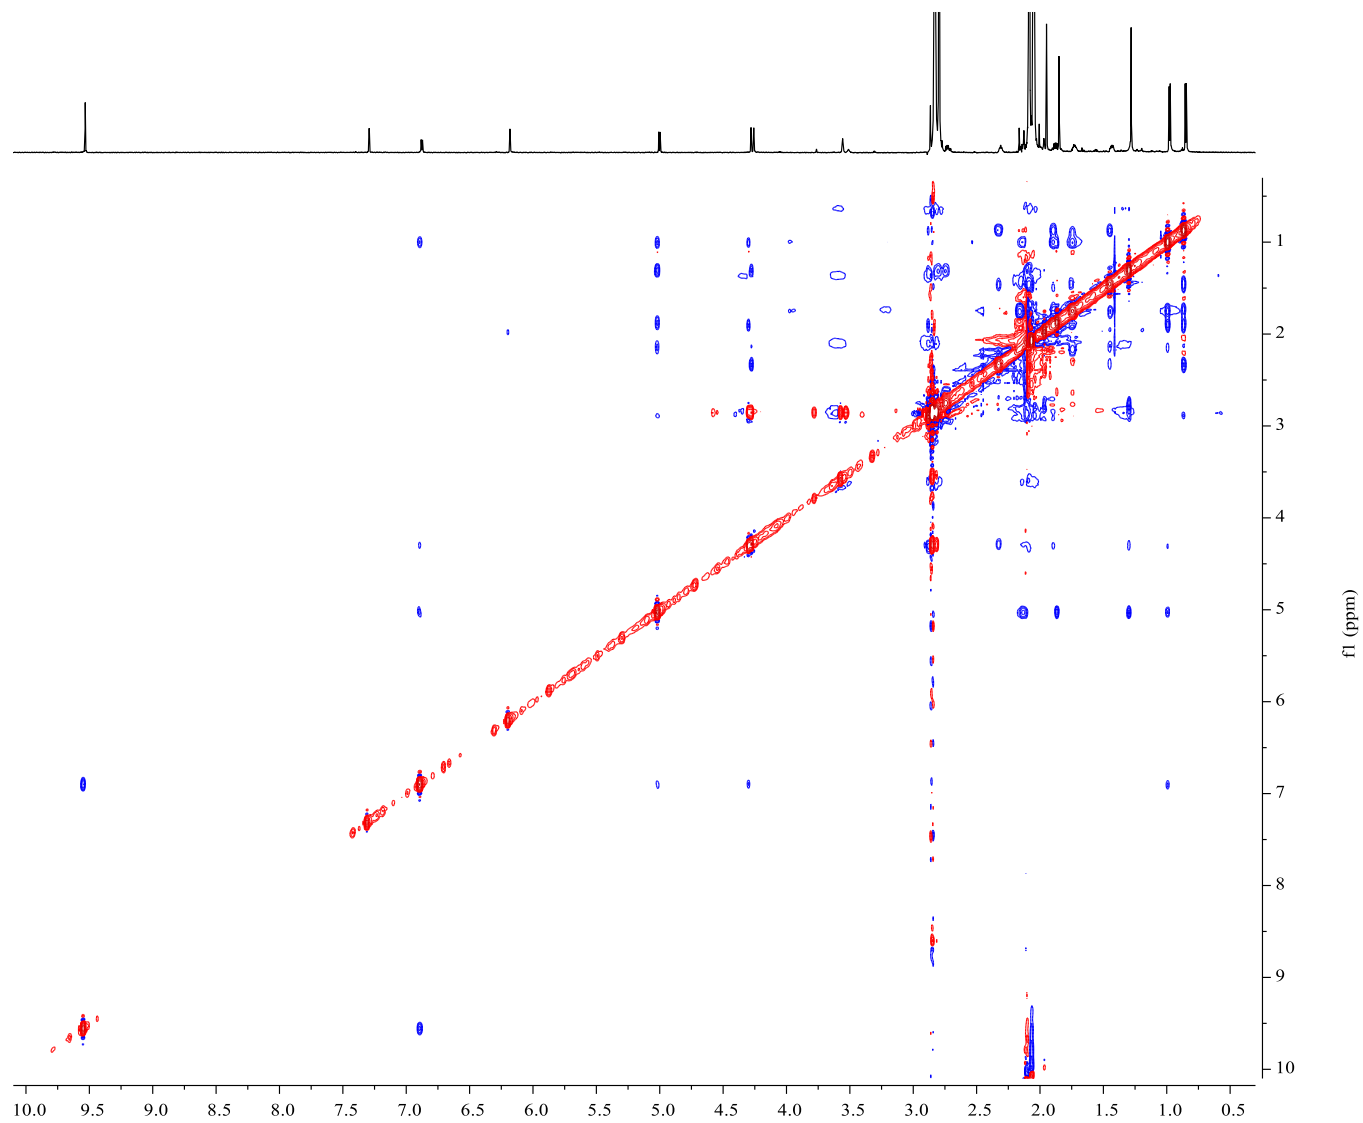

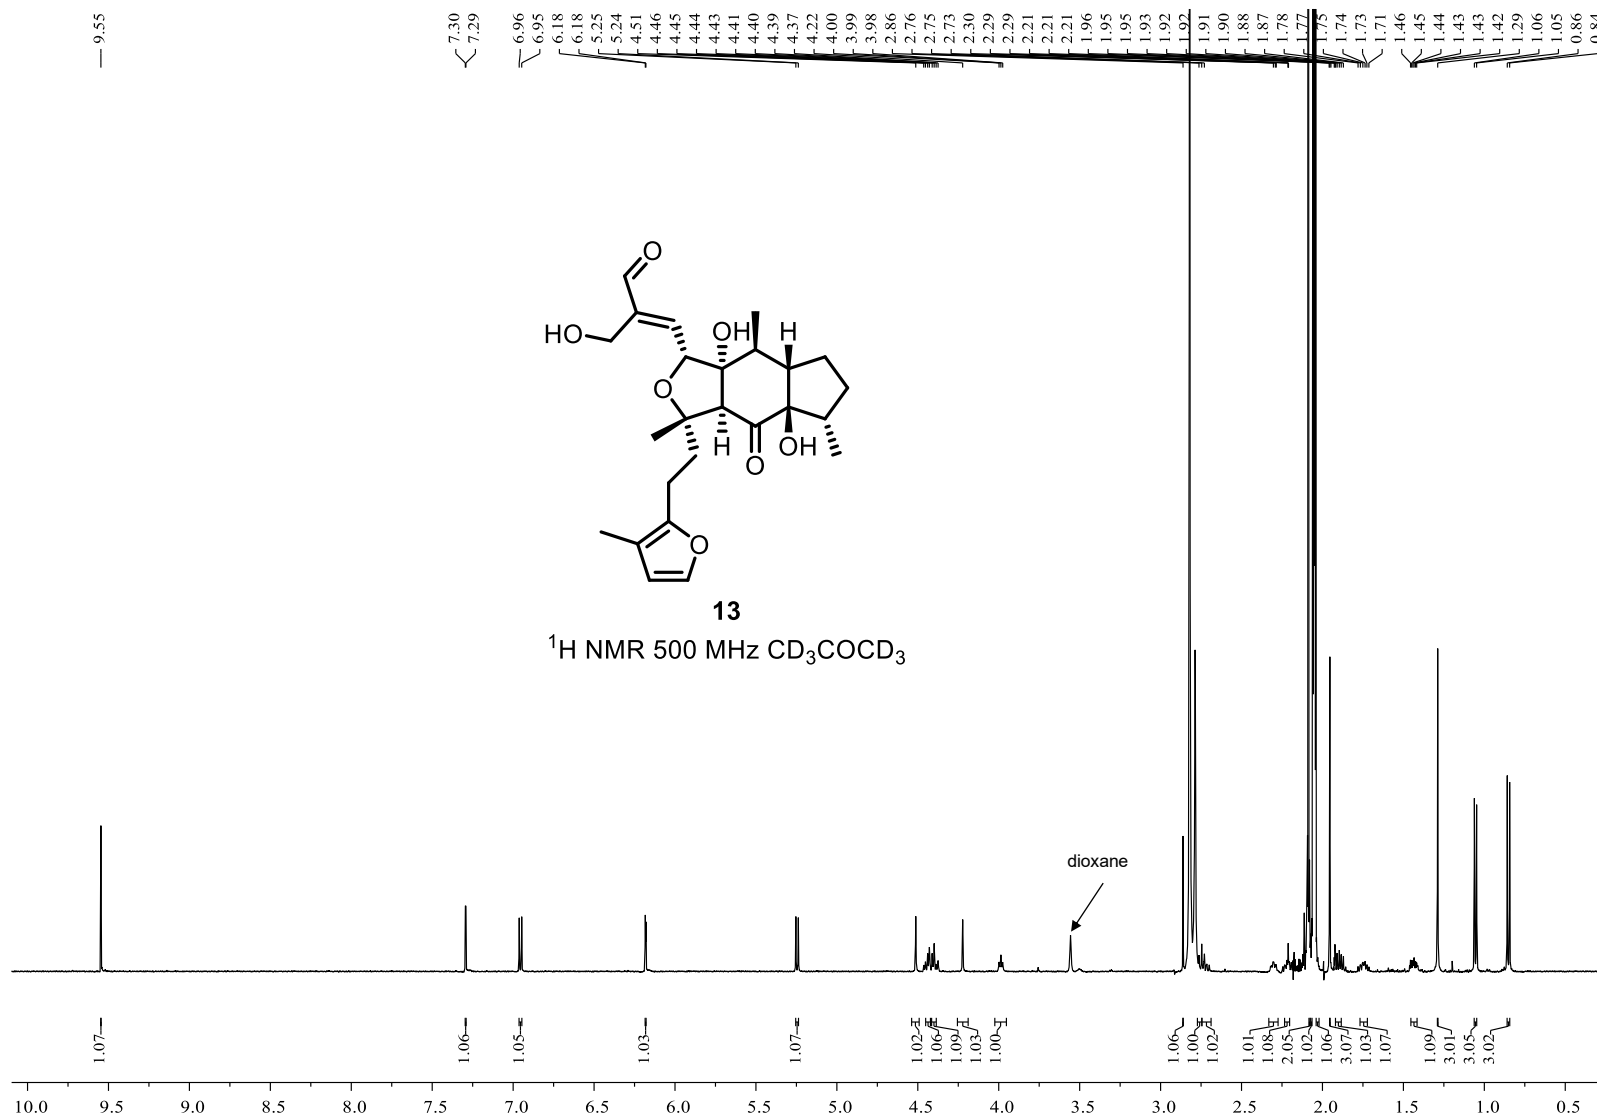

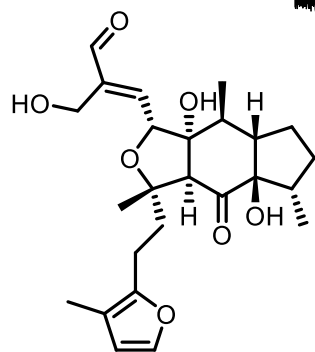

**13**

$^{13}\text{C}$  NMR 126 MHz  $\text{CD}_3\text{COCD}_3$

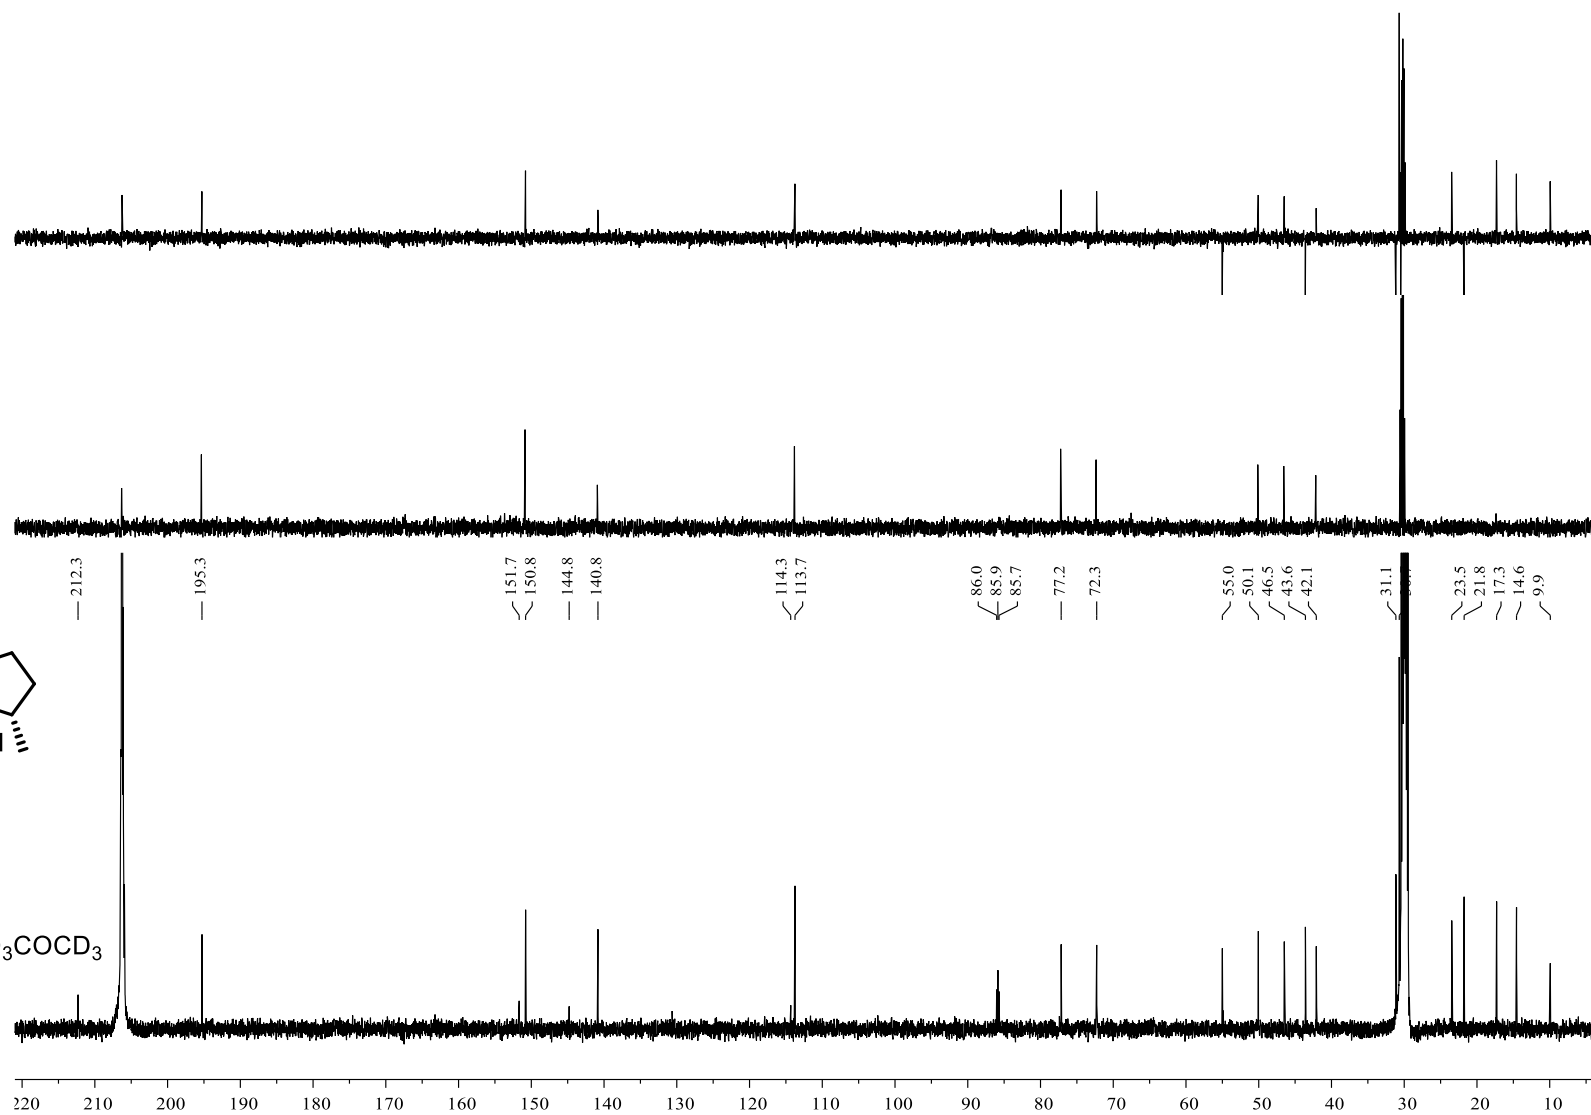

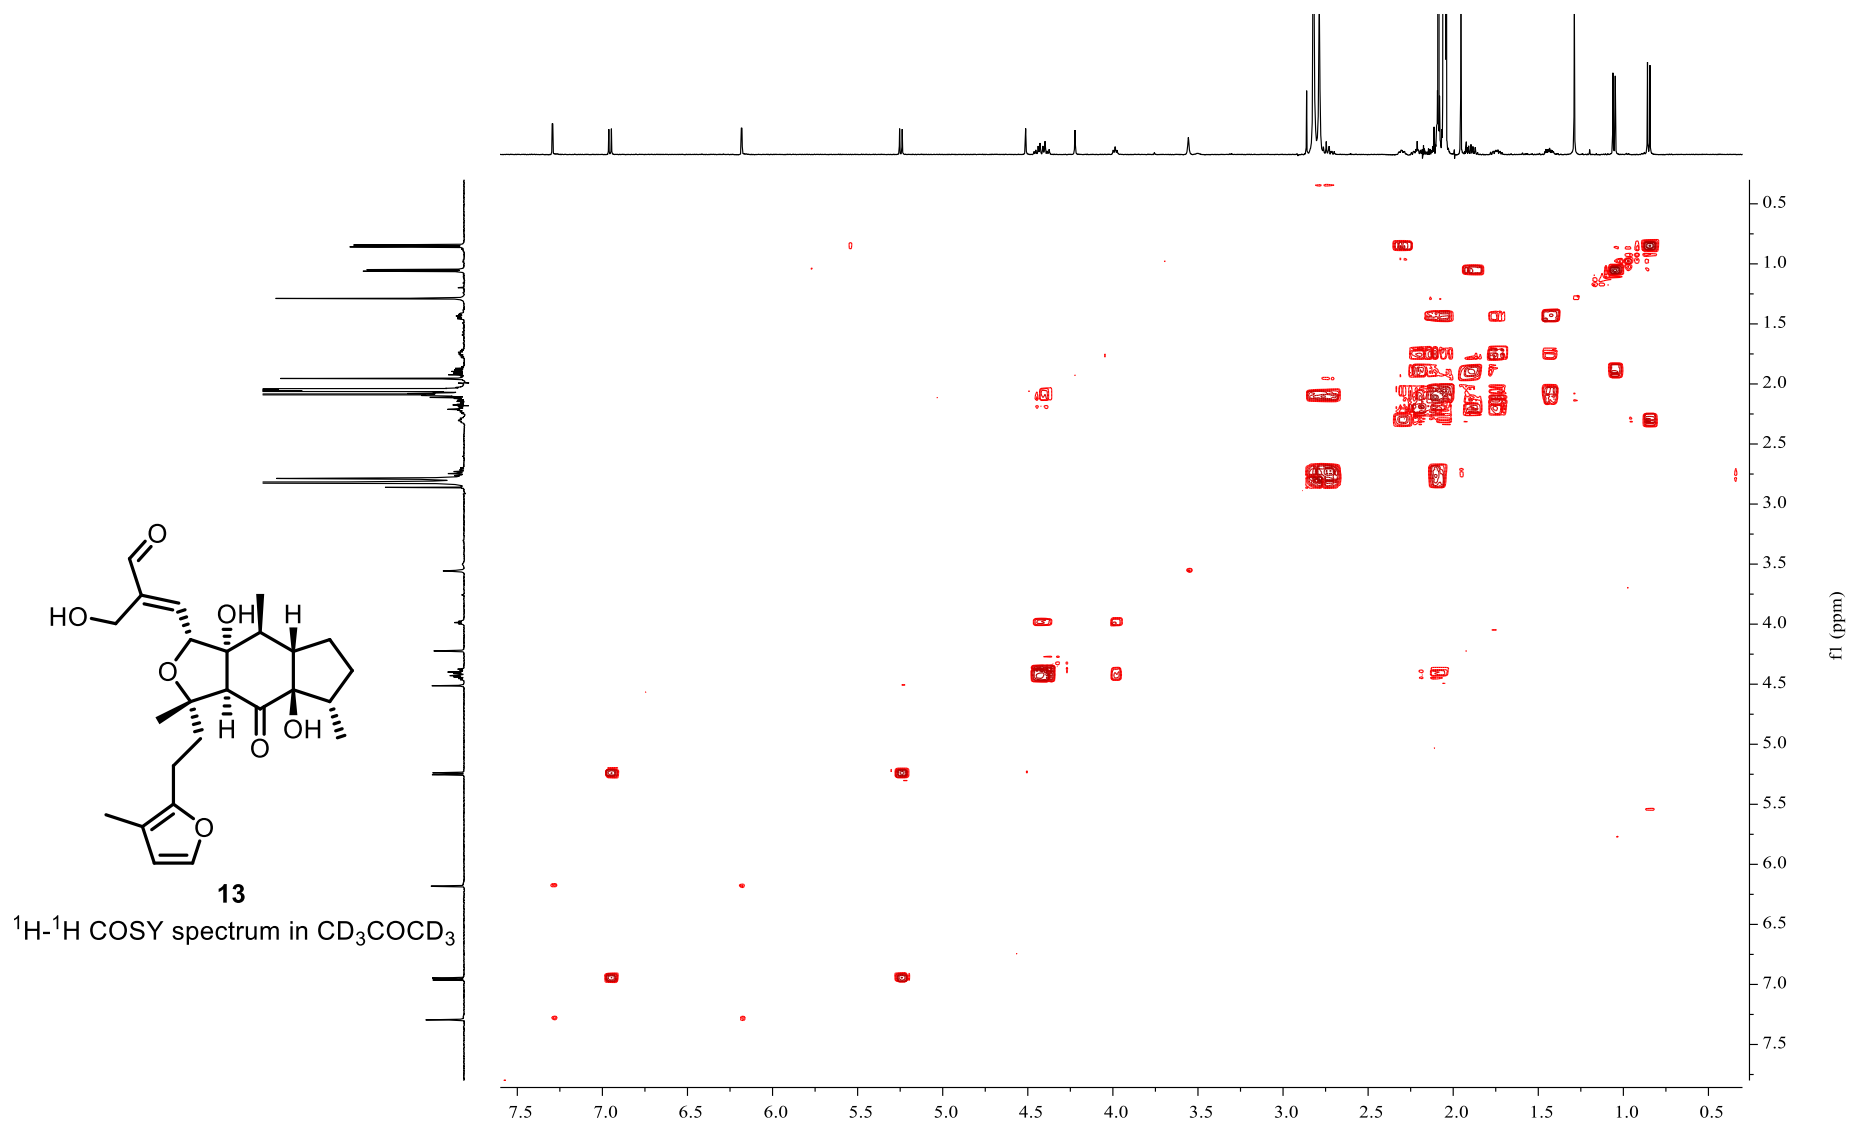

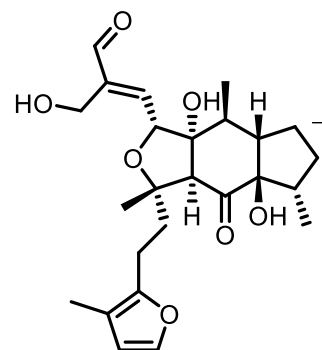

**13**

HSQC spectrum in  $\text{CD}_3\text{COCD}_3$

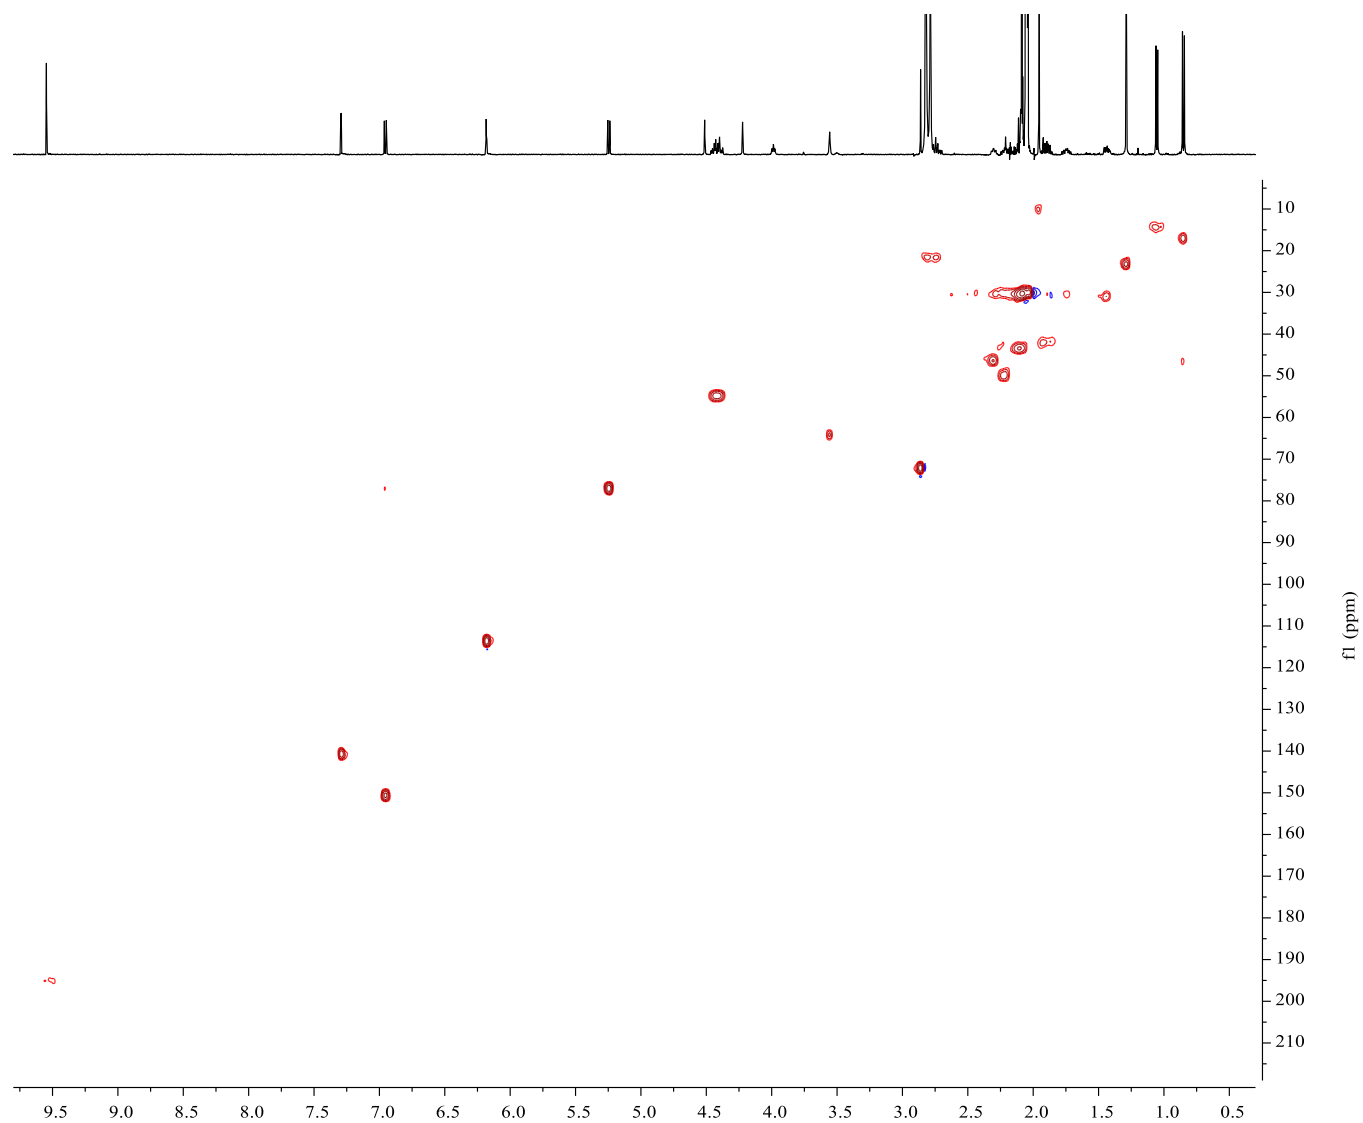

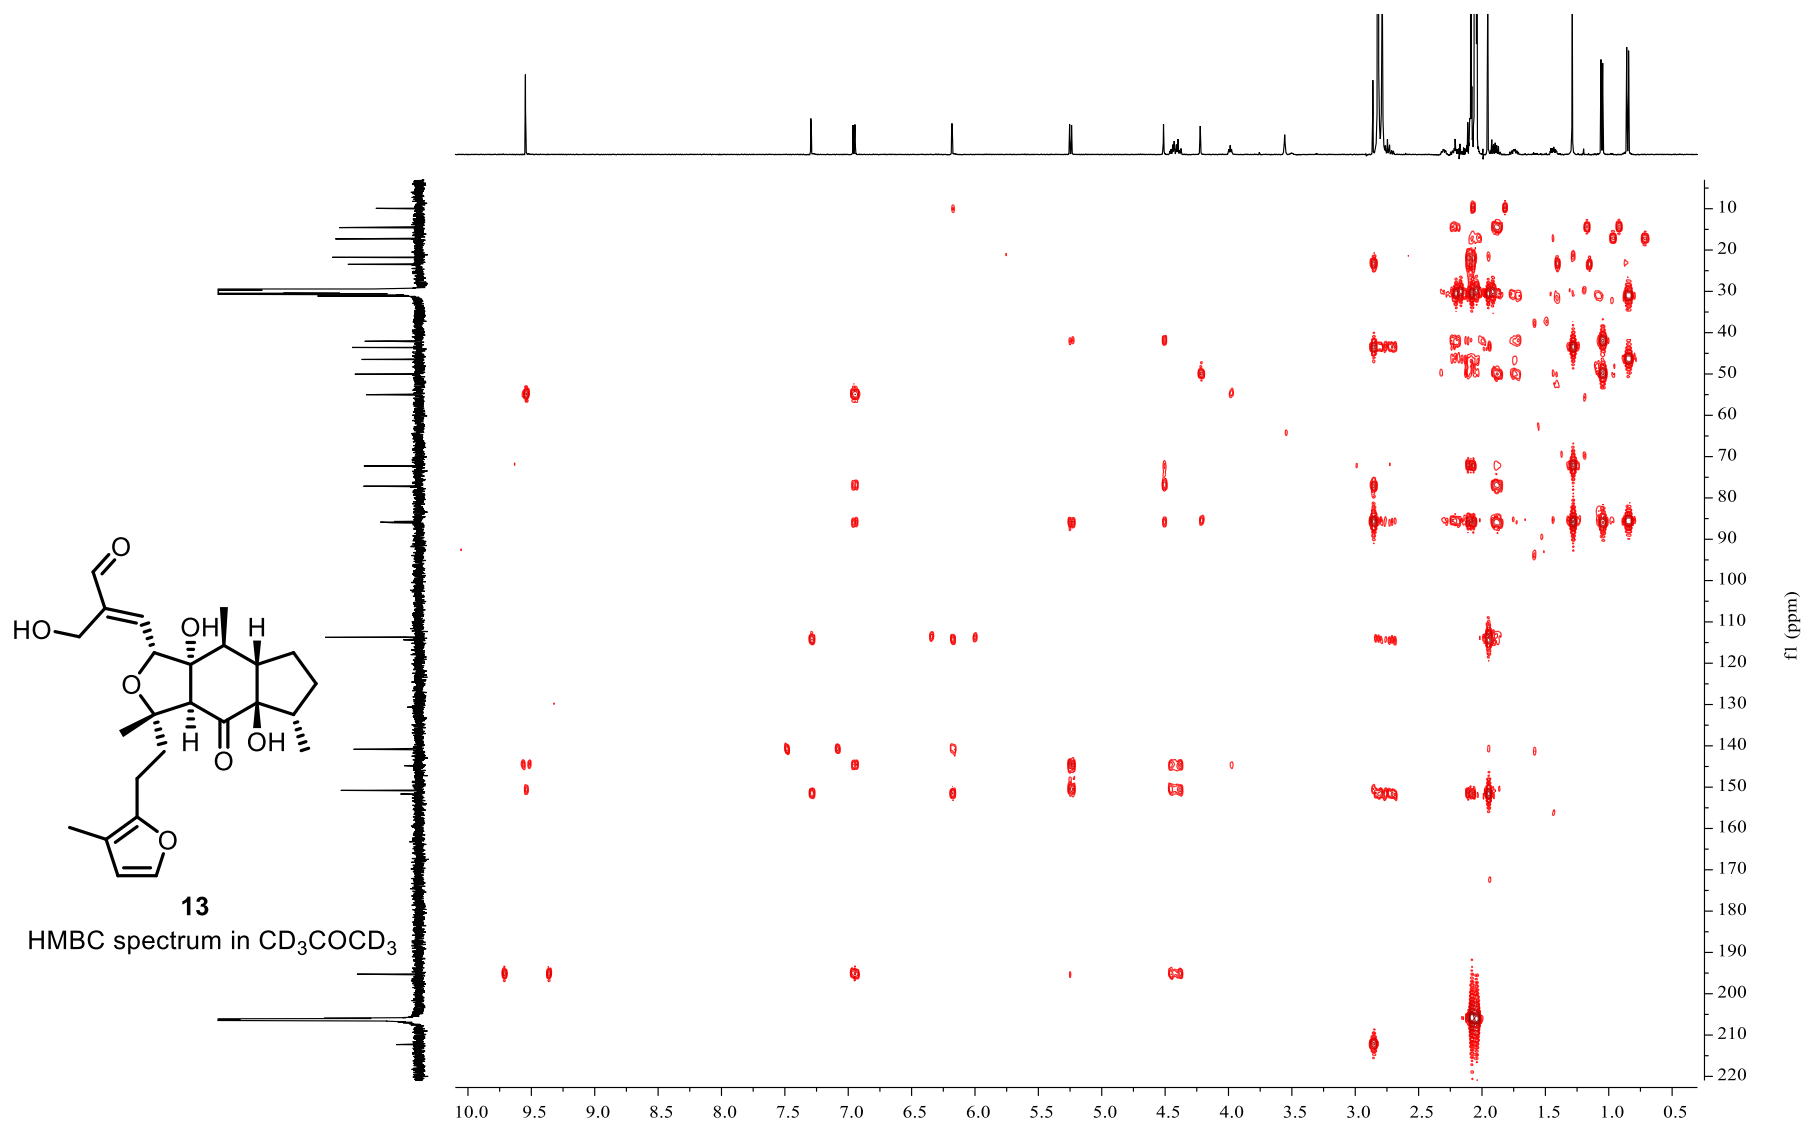

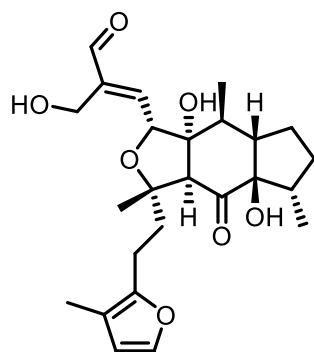

**13**

ROESY spectrum in CD<sub>3</sub>COCD<sub>3</sub>

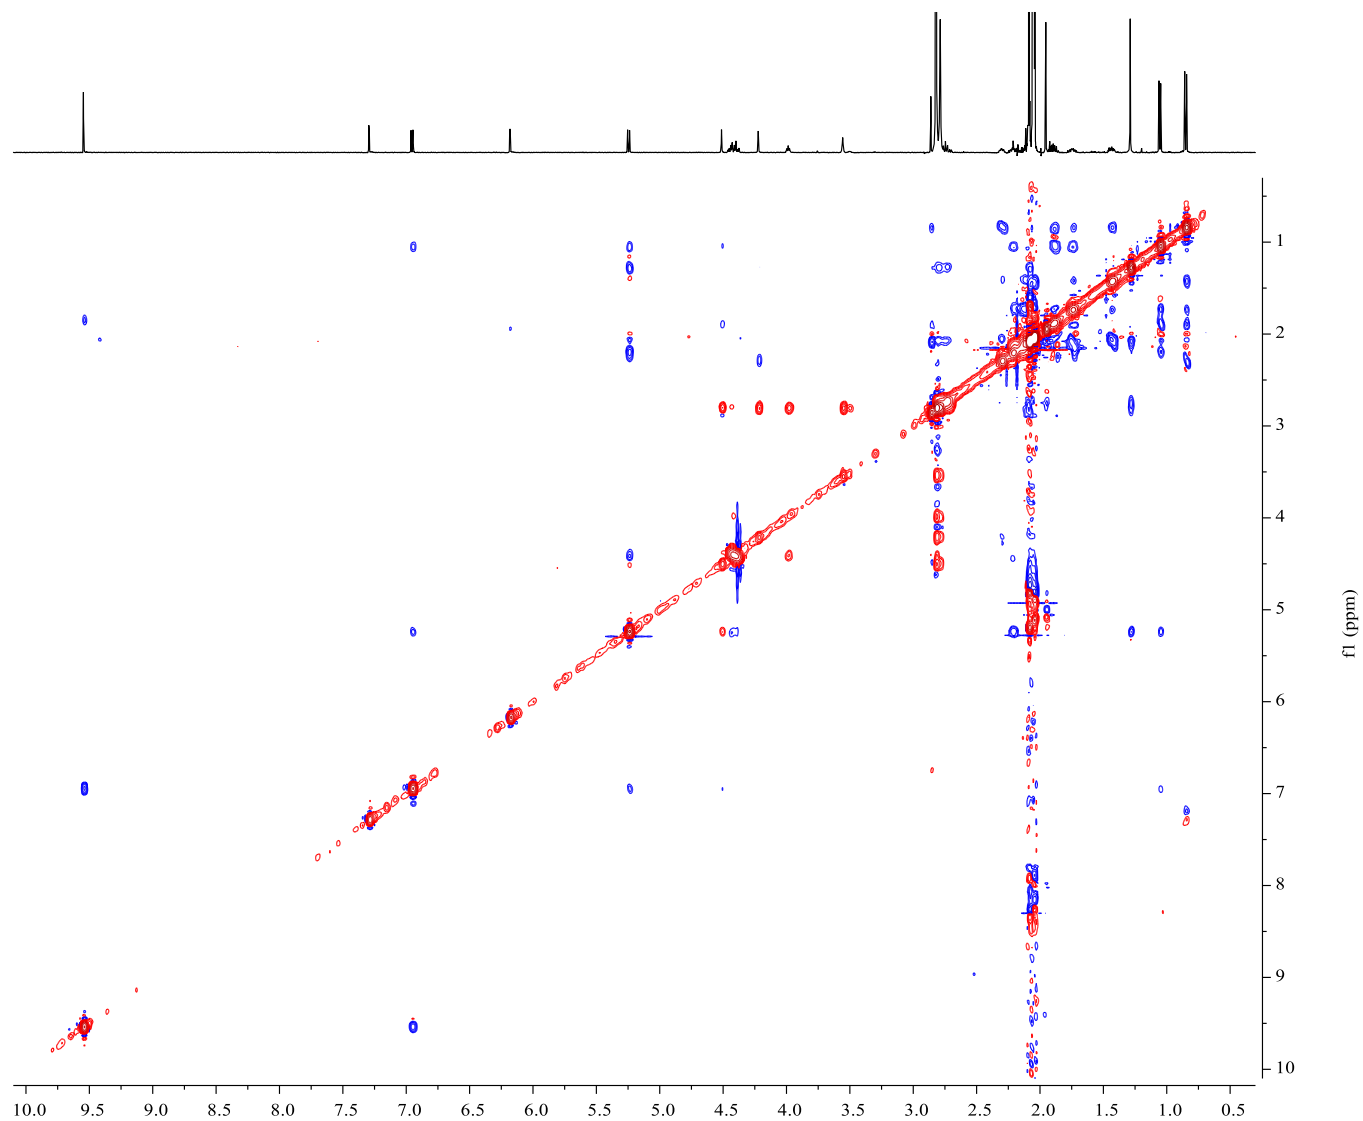



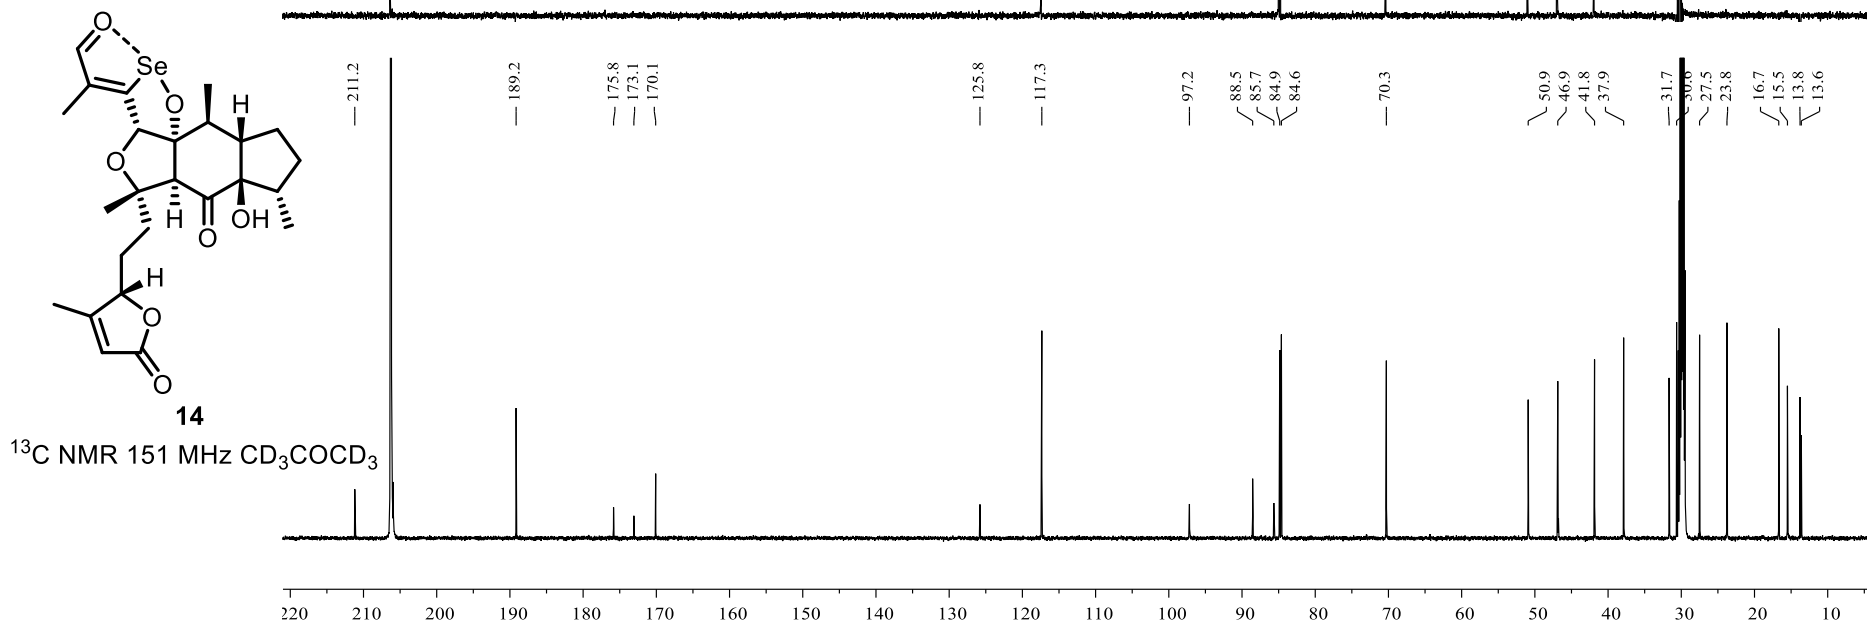

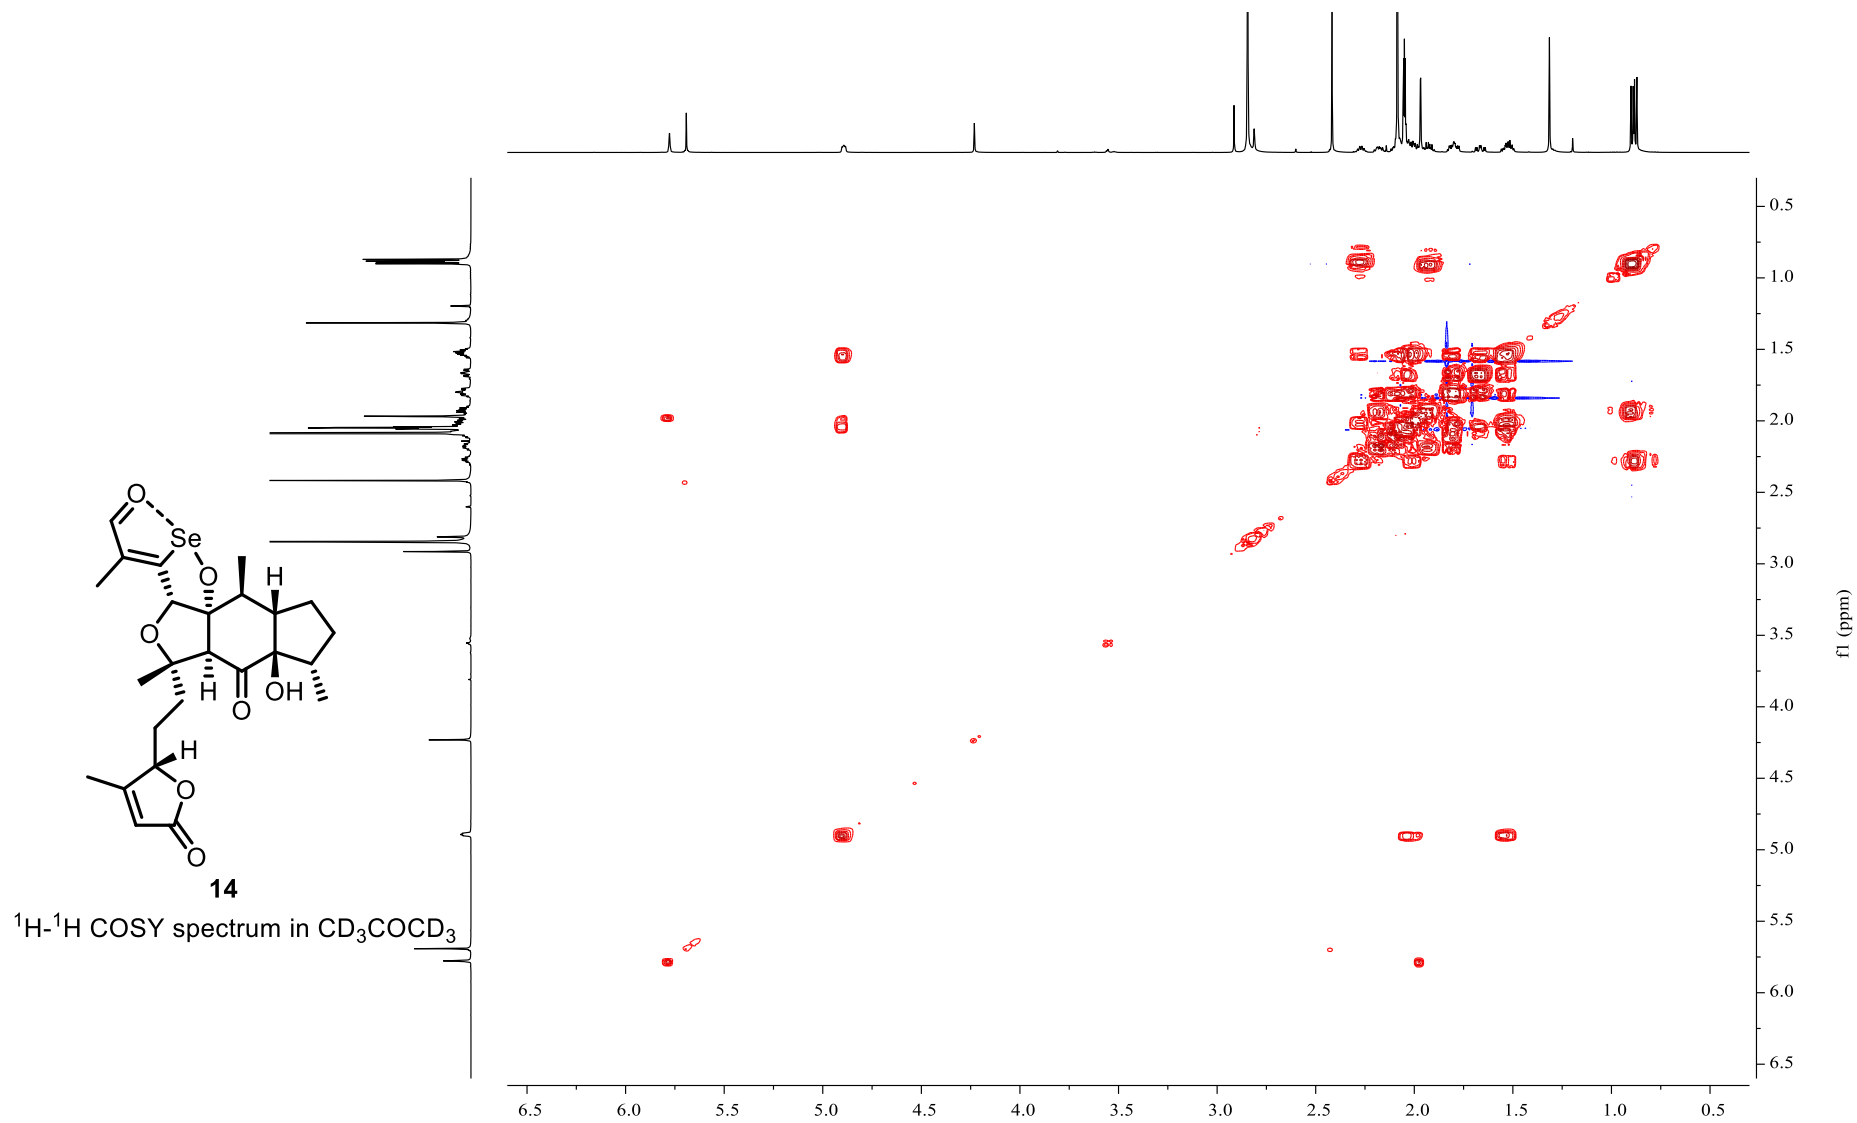

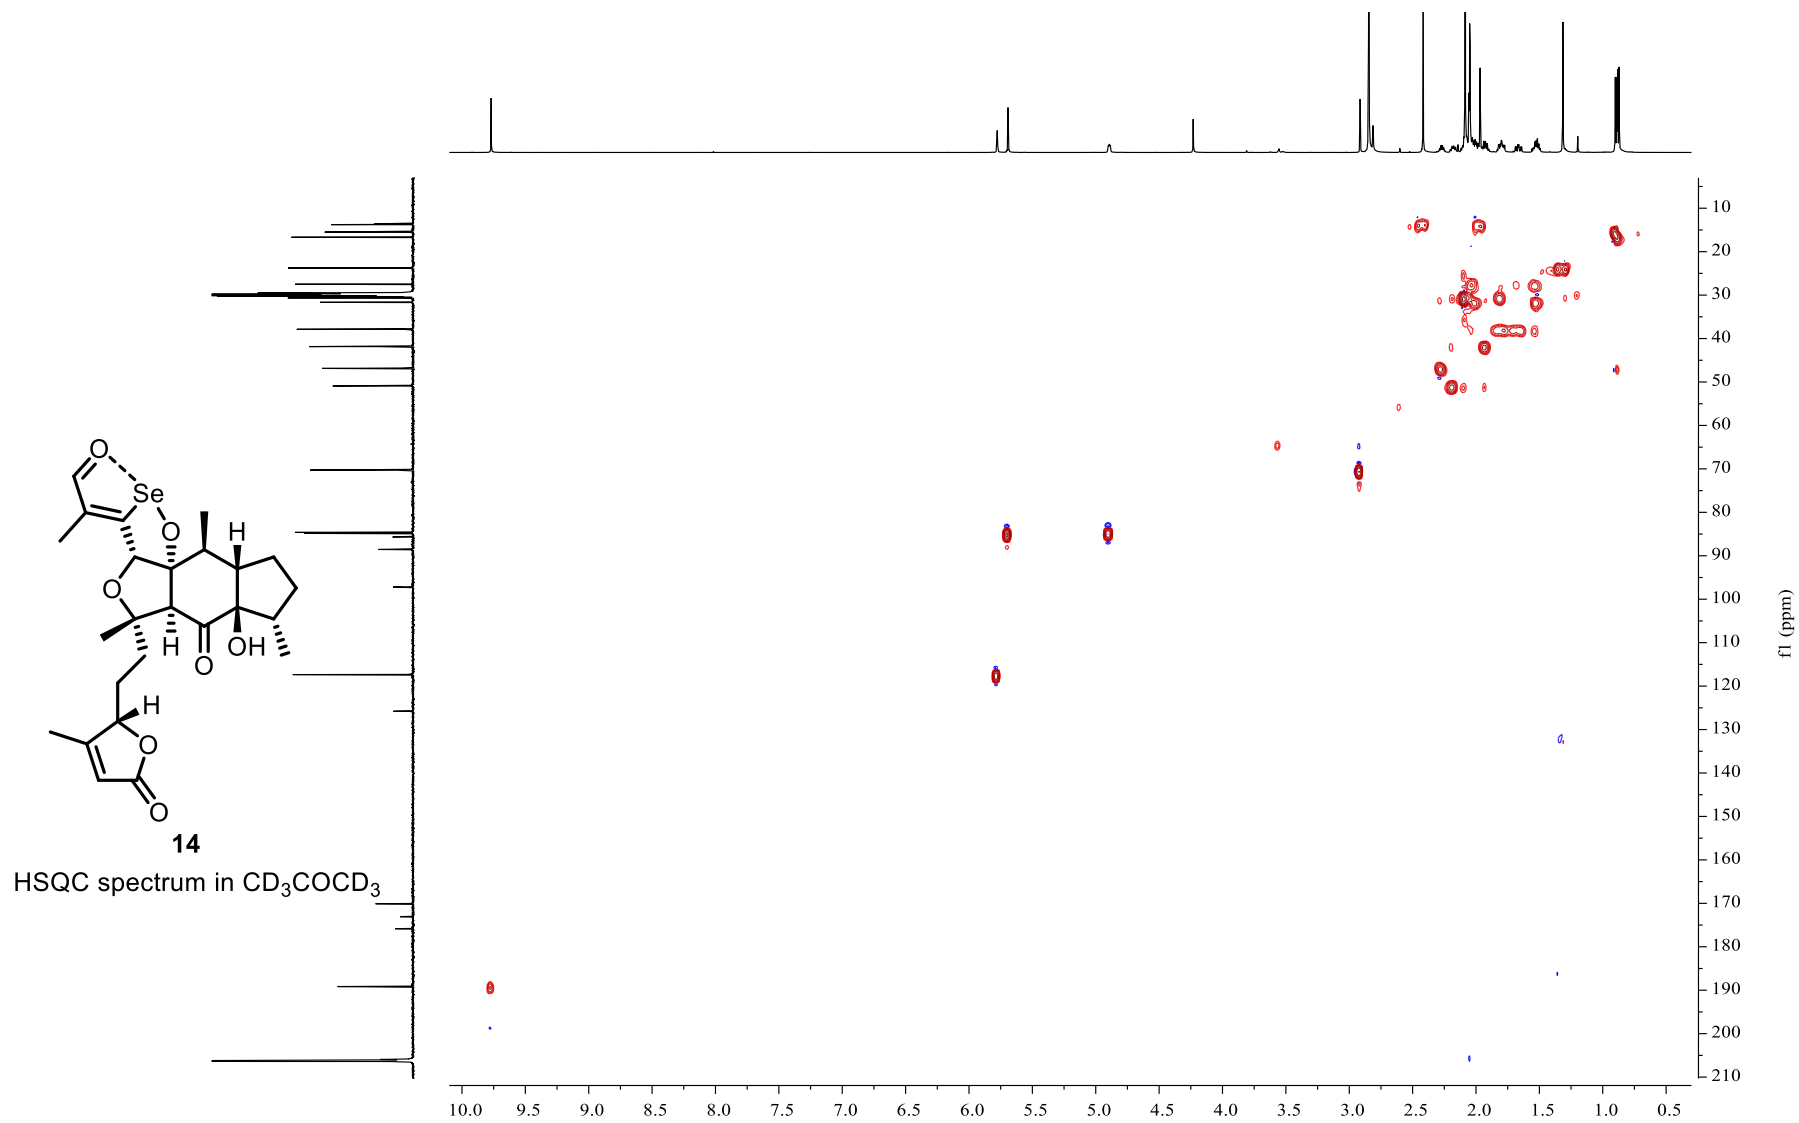

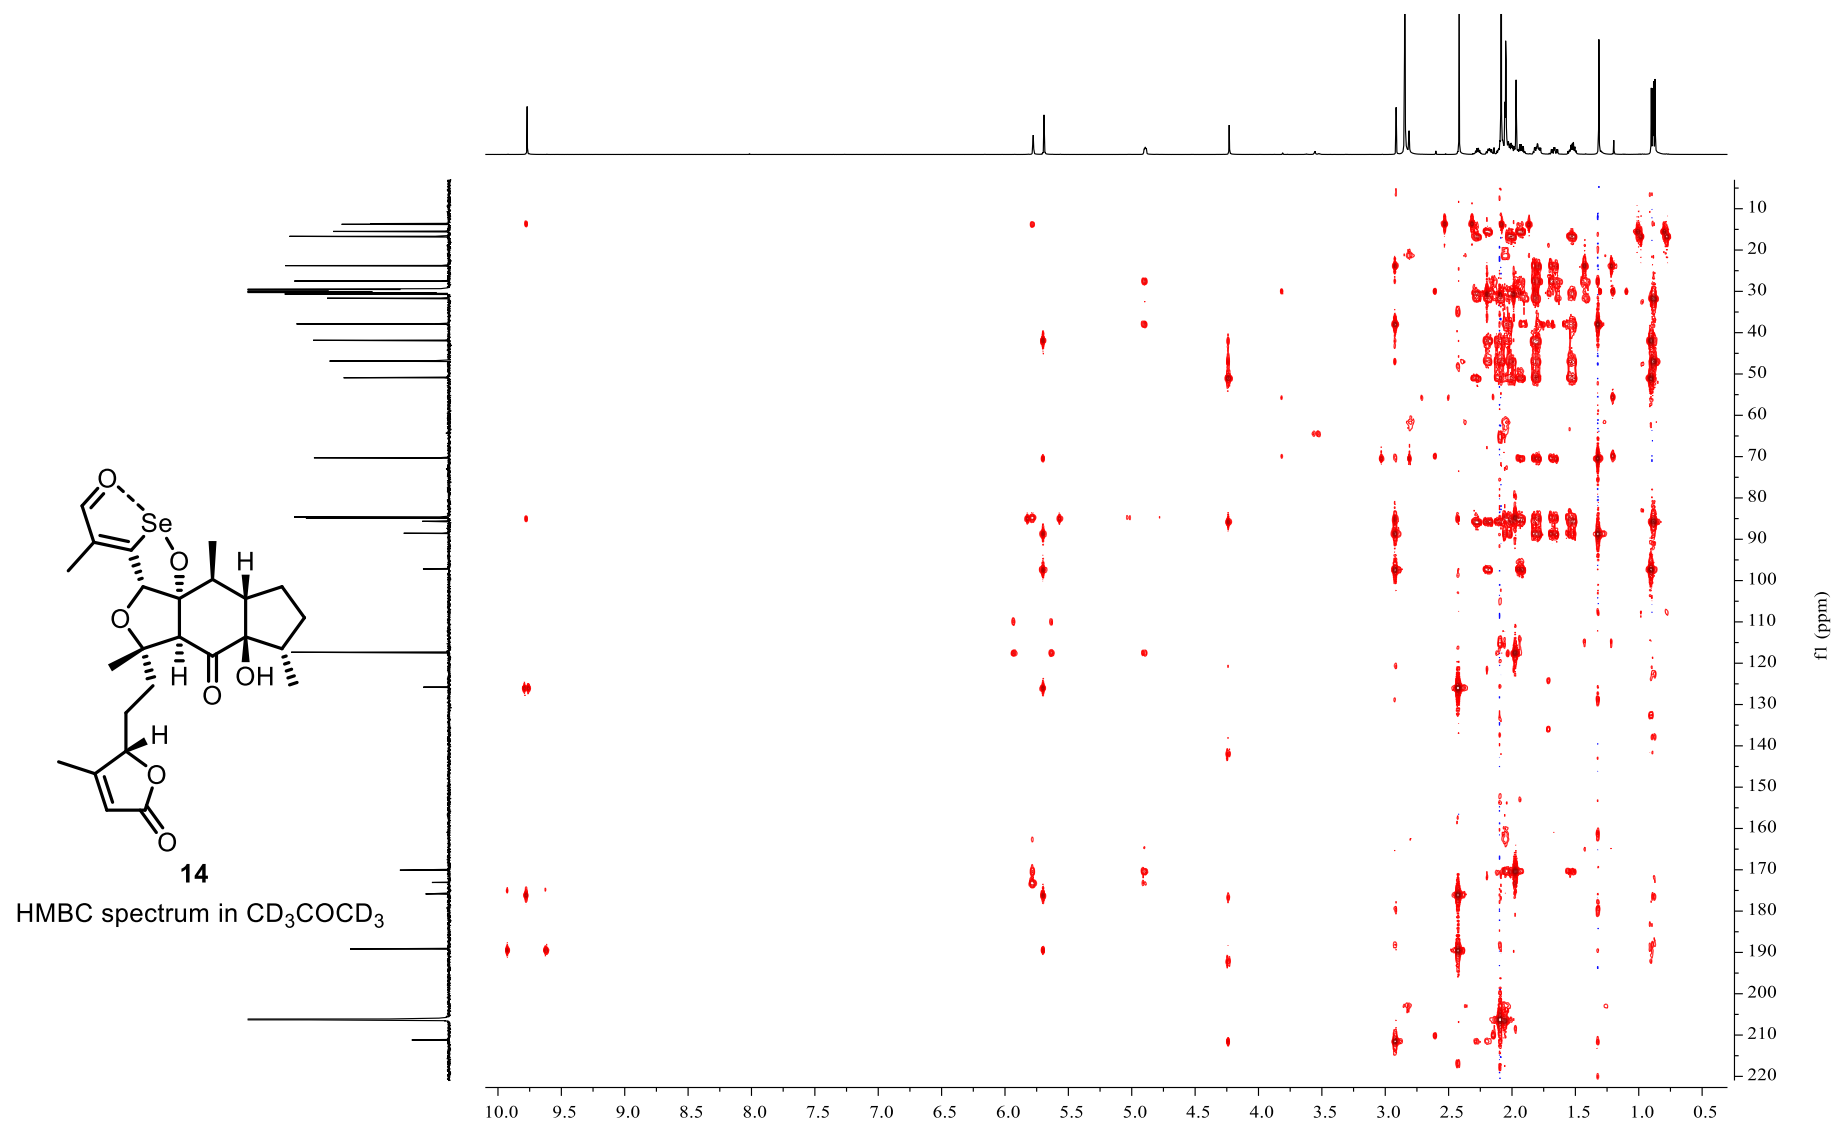

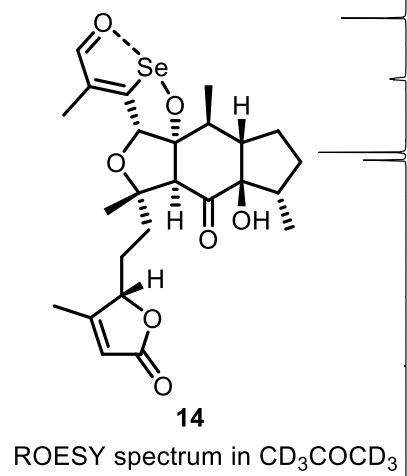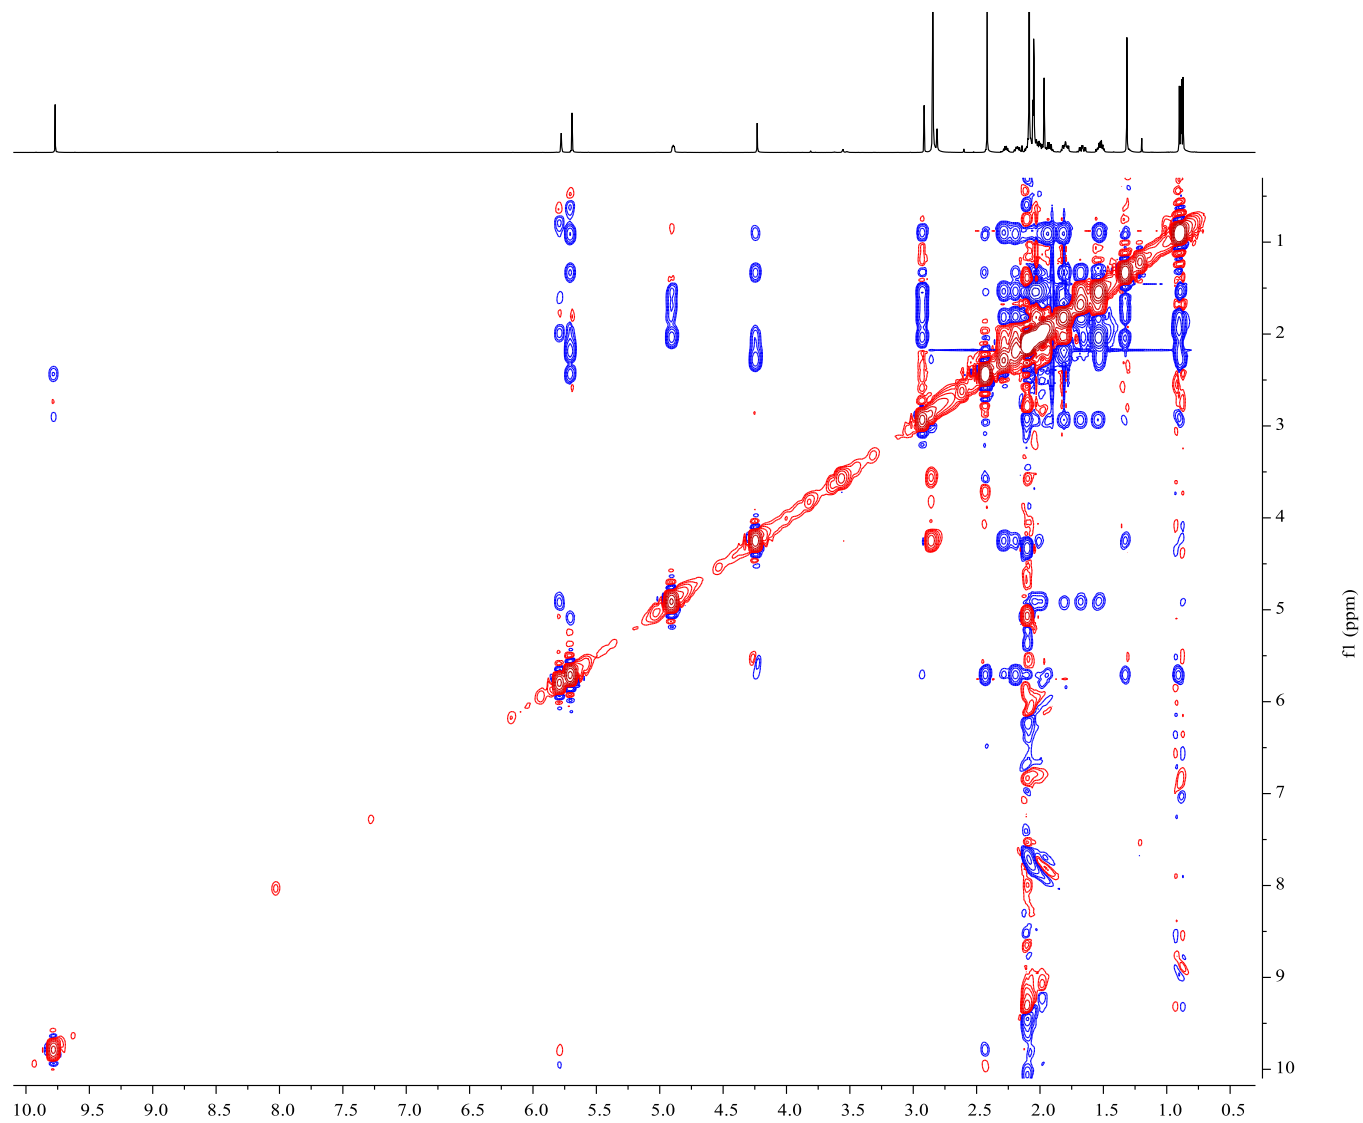

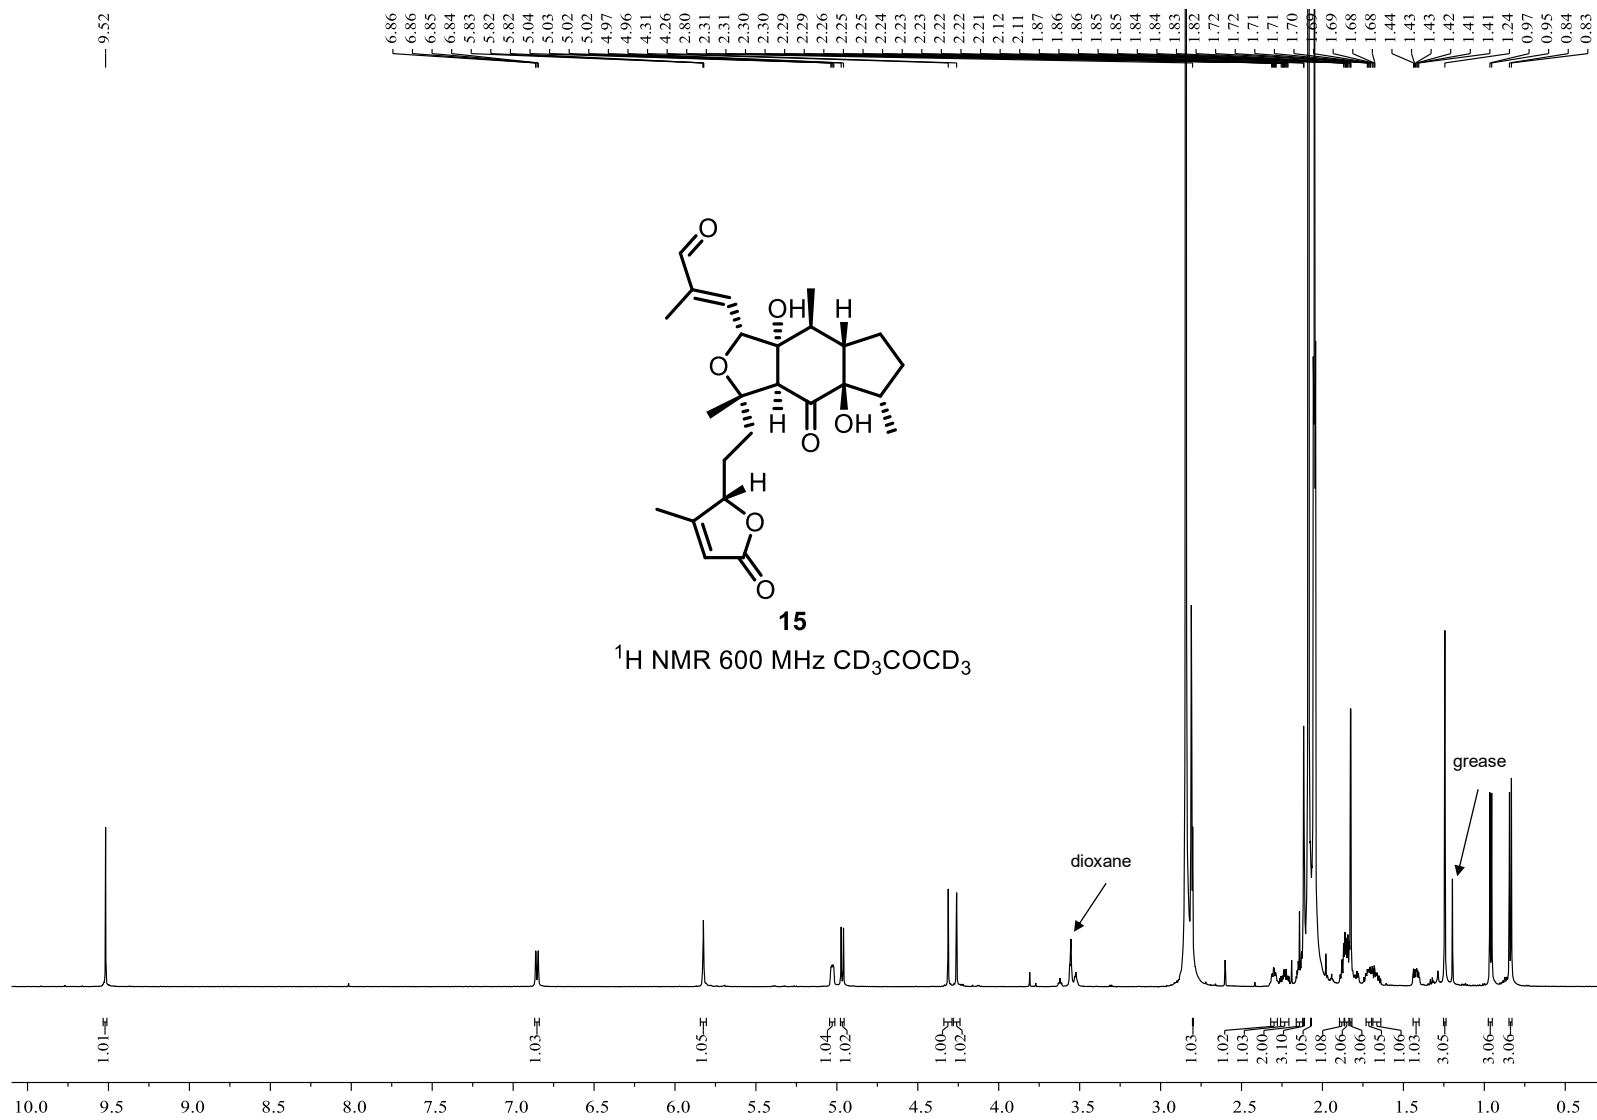

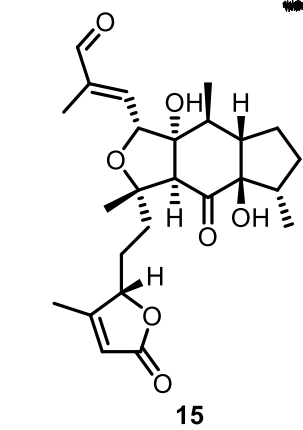

$^{13}\text{C}$  NMR 151 MHz  $\text{CD}_3\text{COCD}_3$

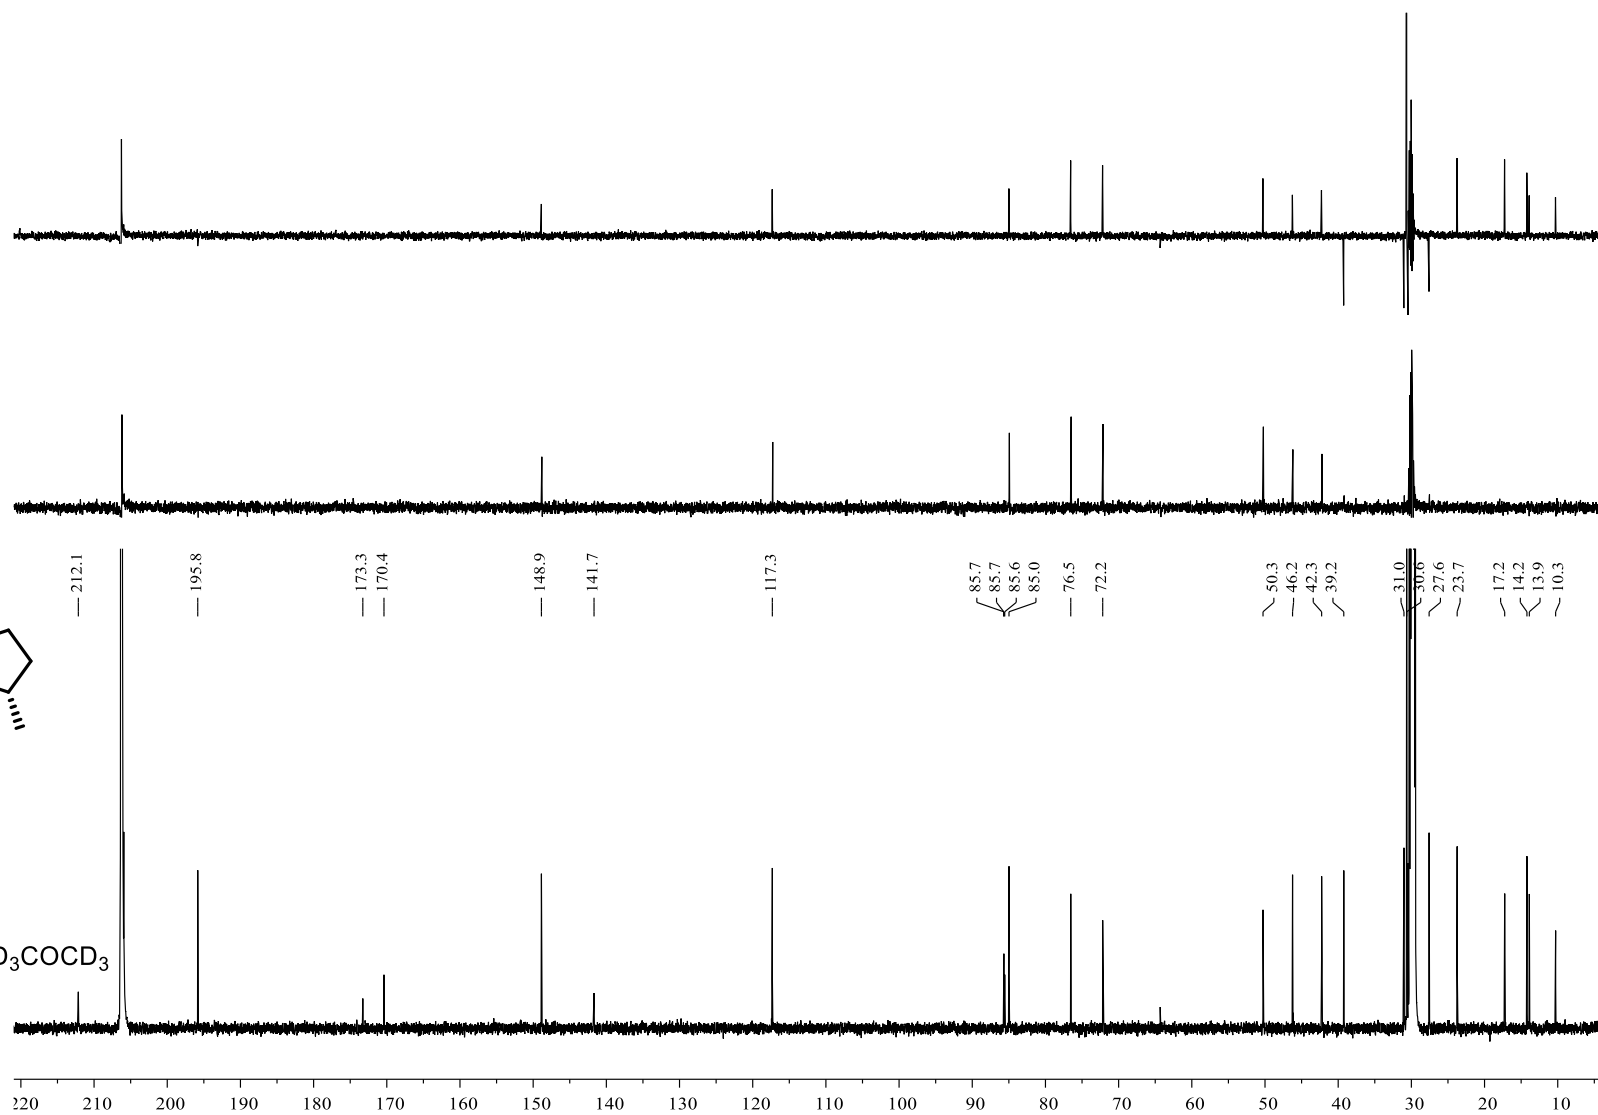

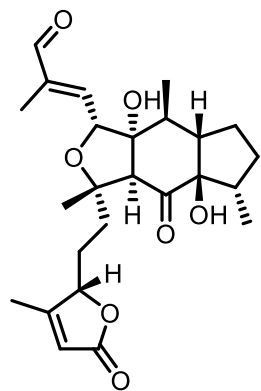

**15**

$^1\text{H}$ - $^1\text{H}$  COSY spectrum in  $\text{CD}_3\text{COCD}_3$

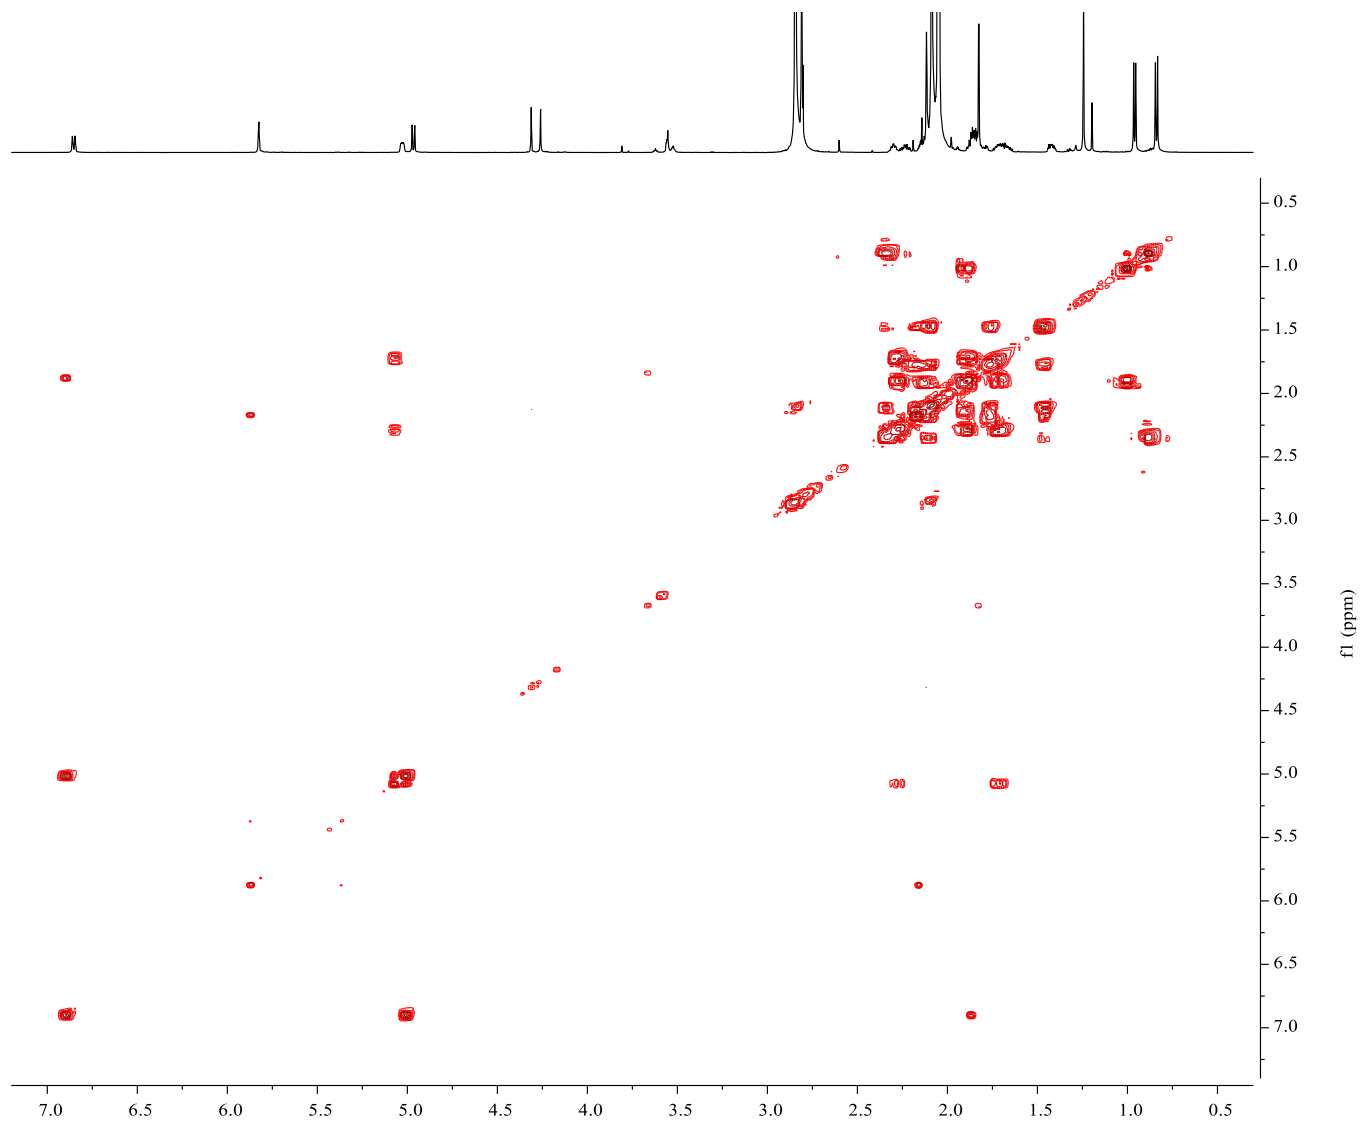

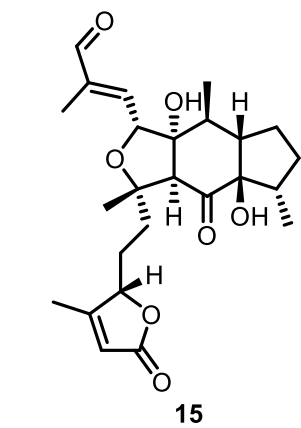

HSQC spectrum in  $\text{CD}_3\text{COCD}_3$

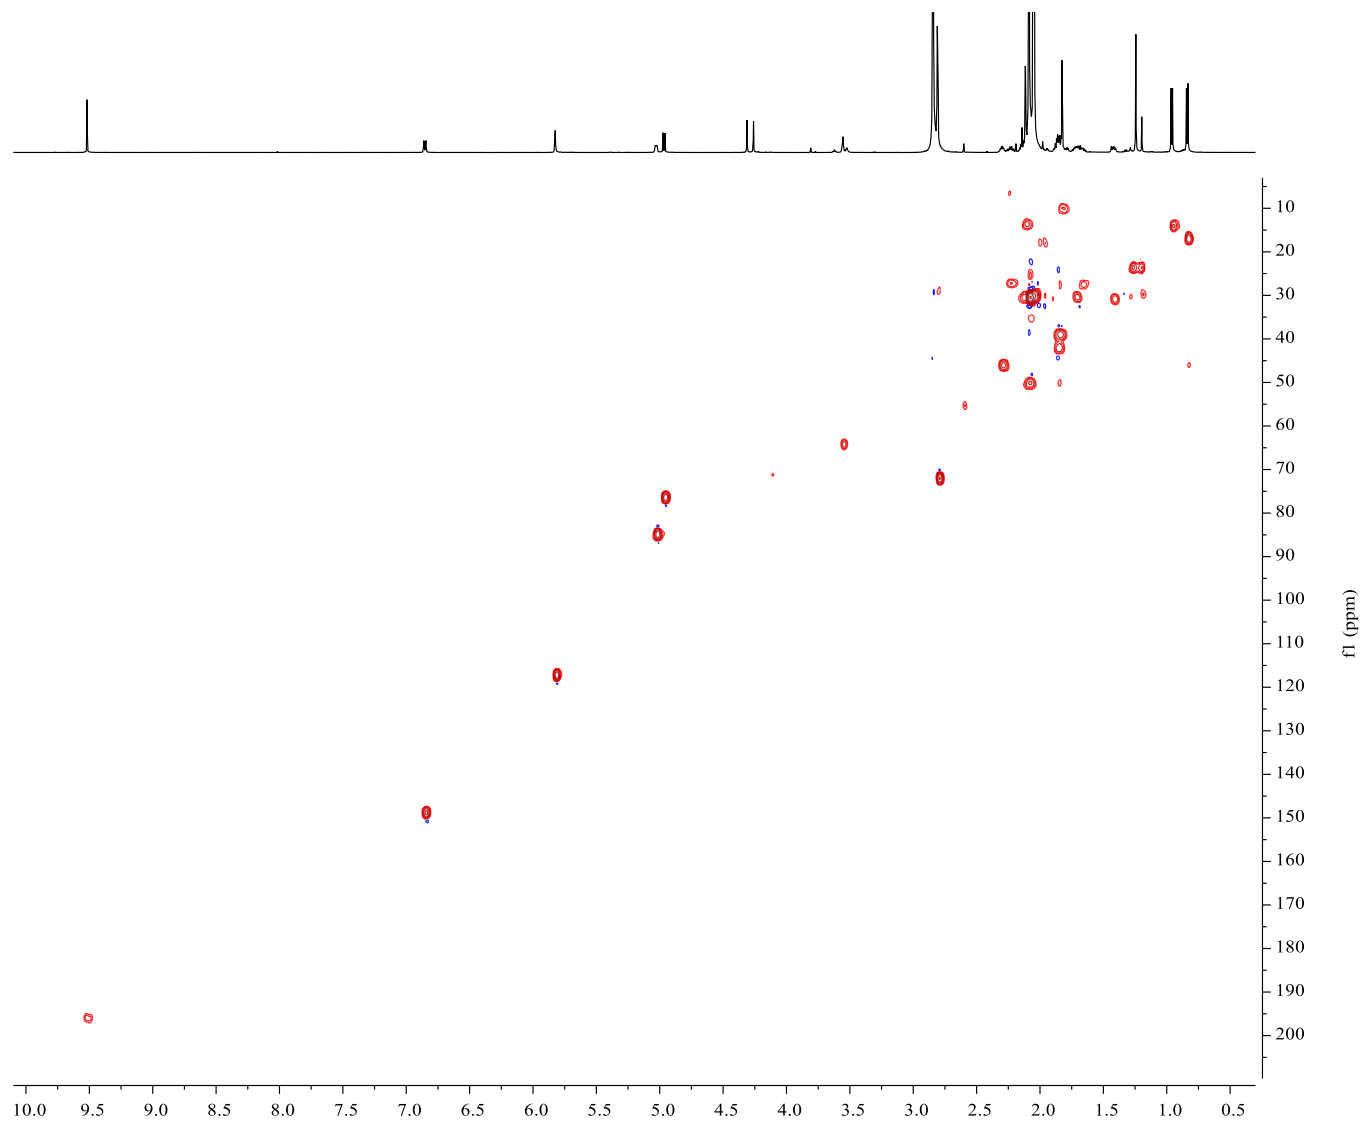

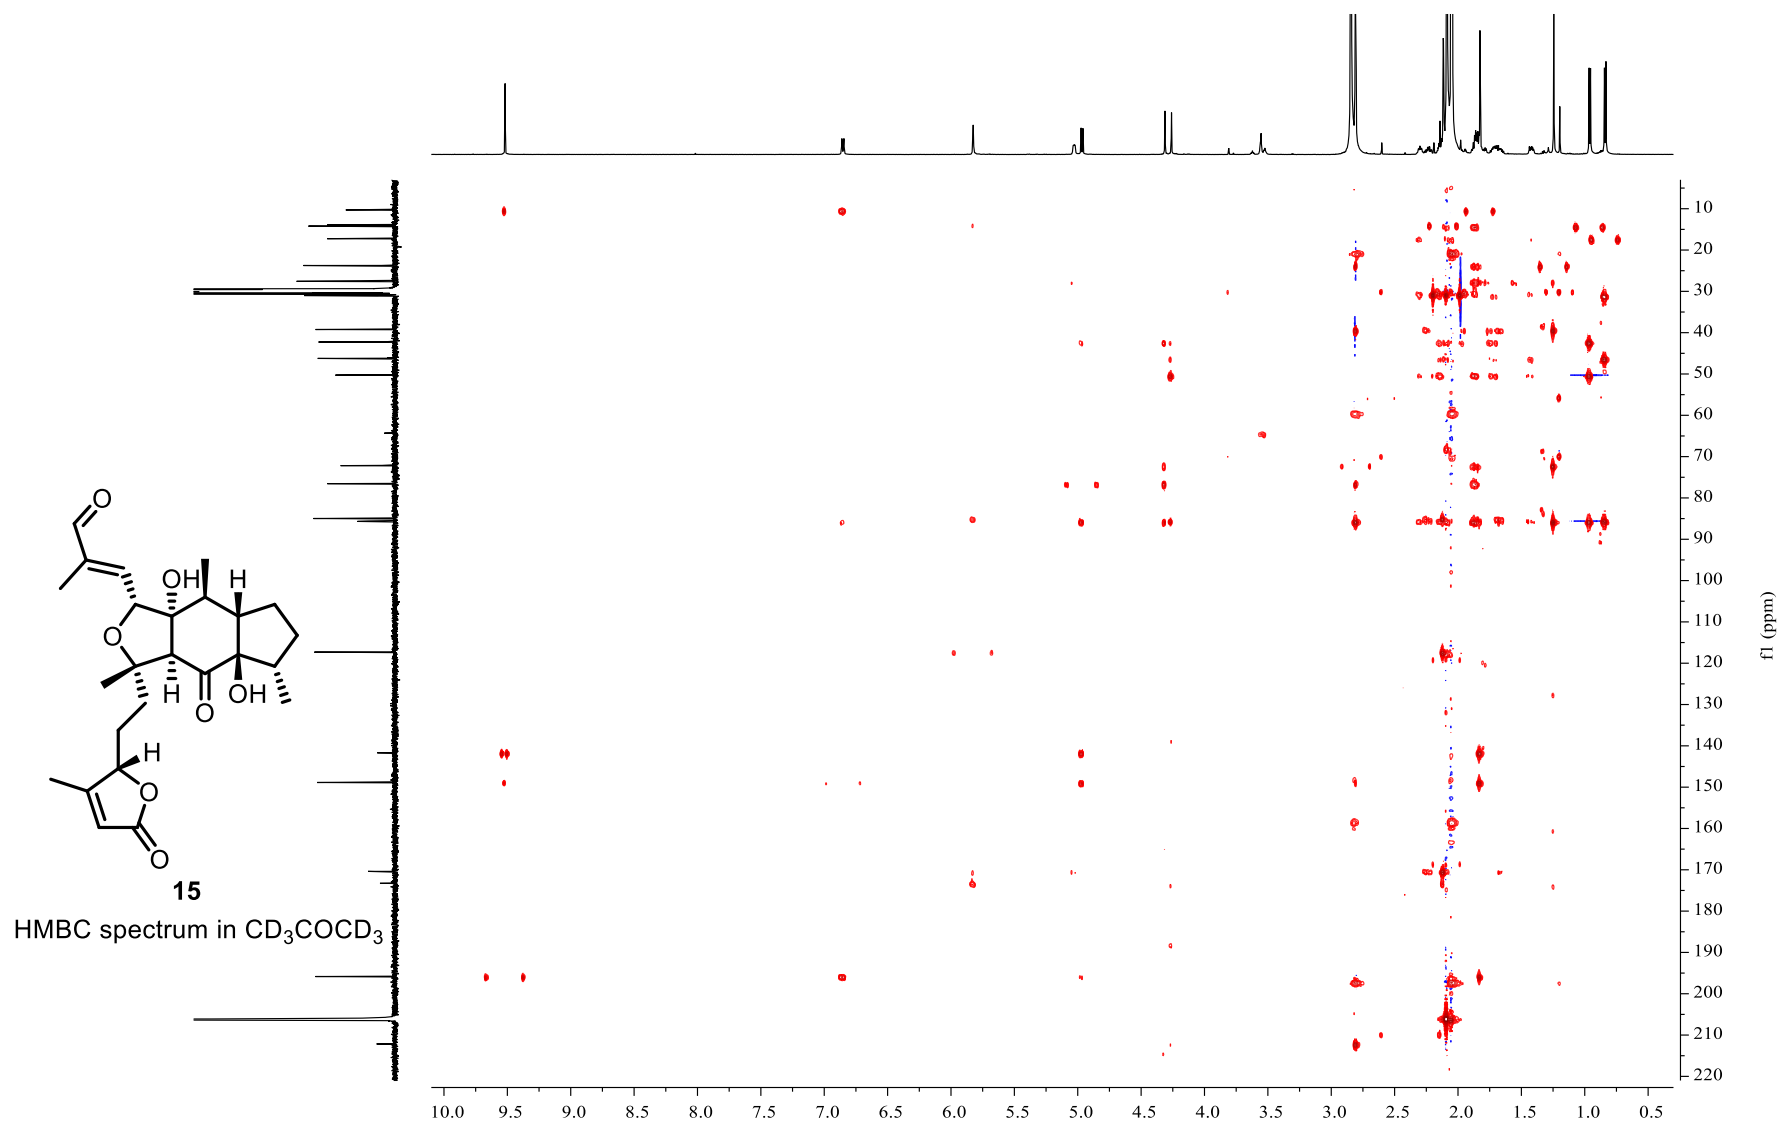

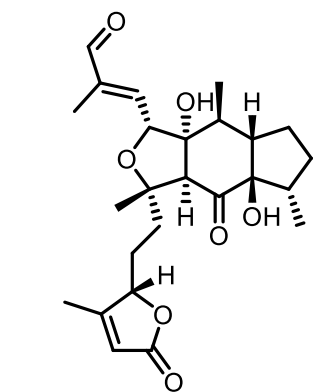

**15**

ROESY spectrum in  $\text{CD}_3\text{COCD}_3$

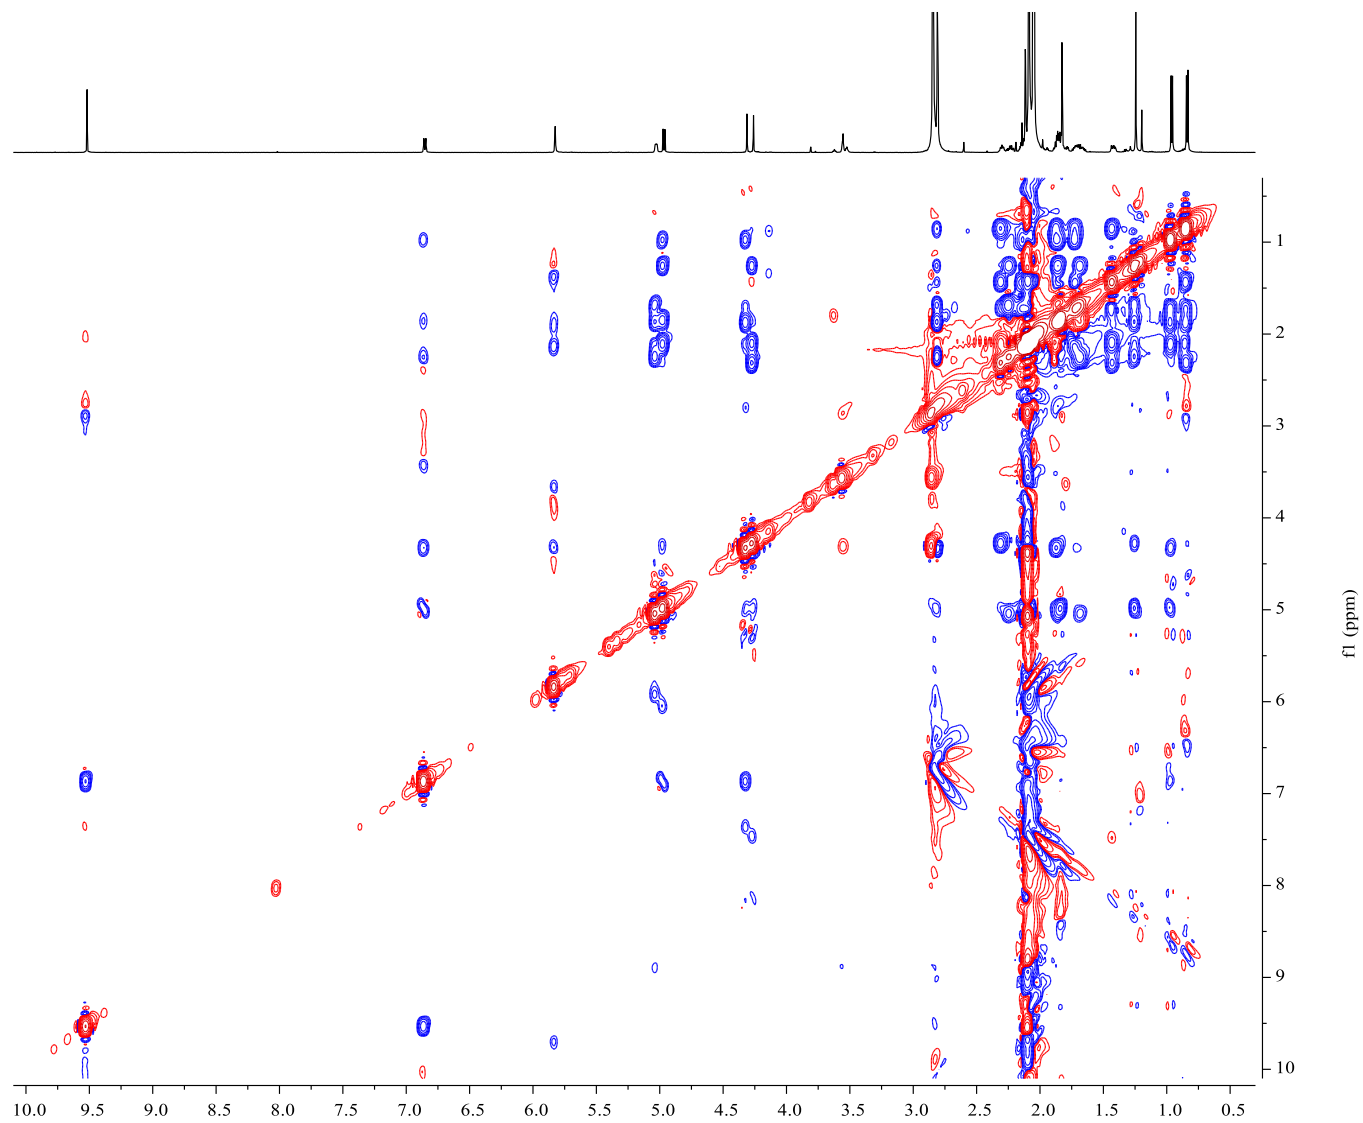

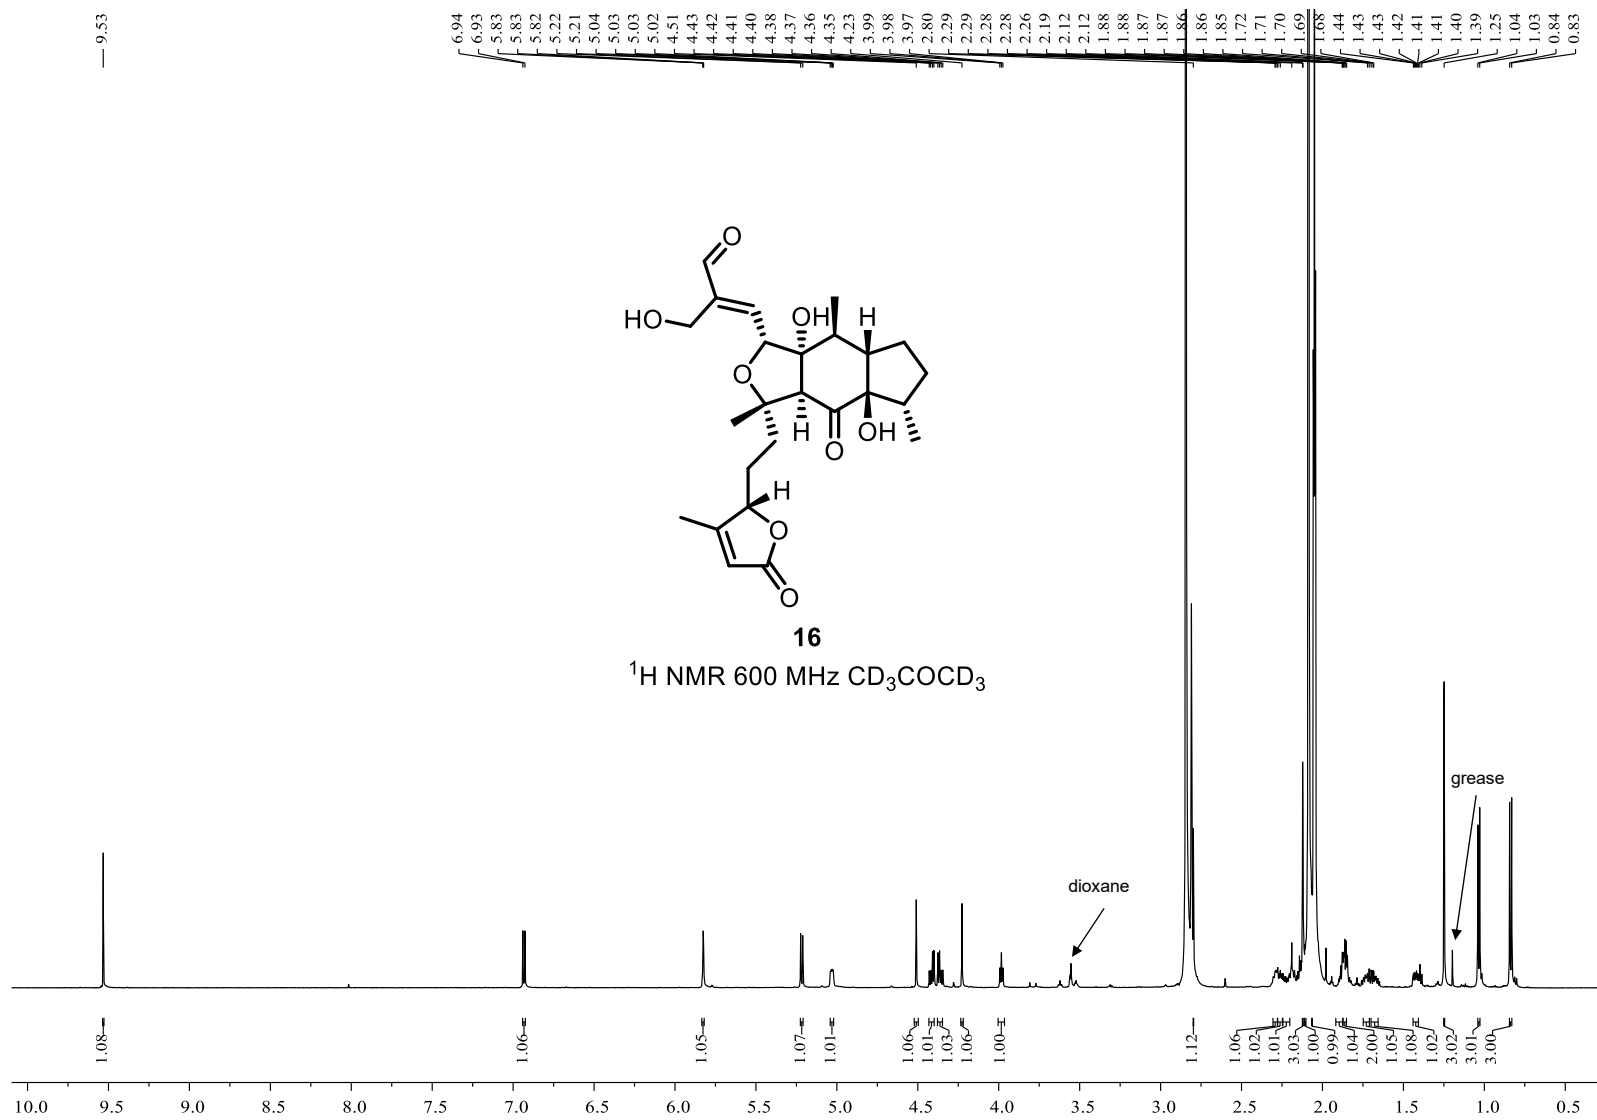

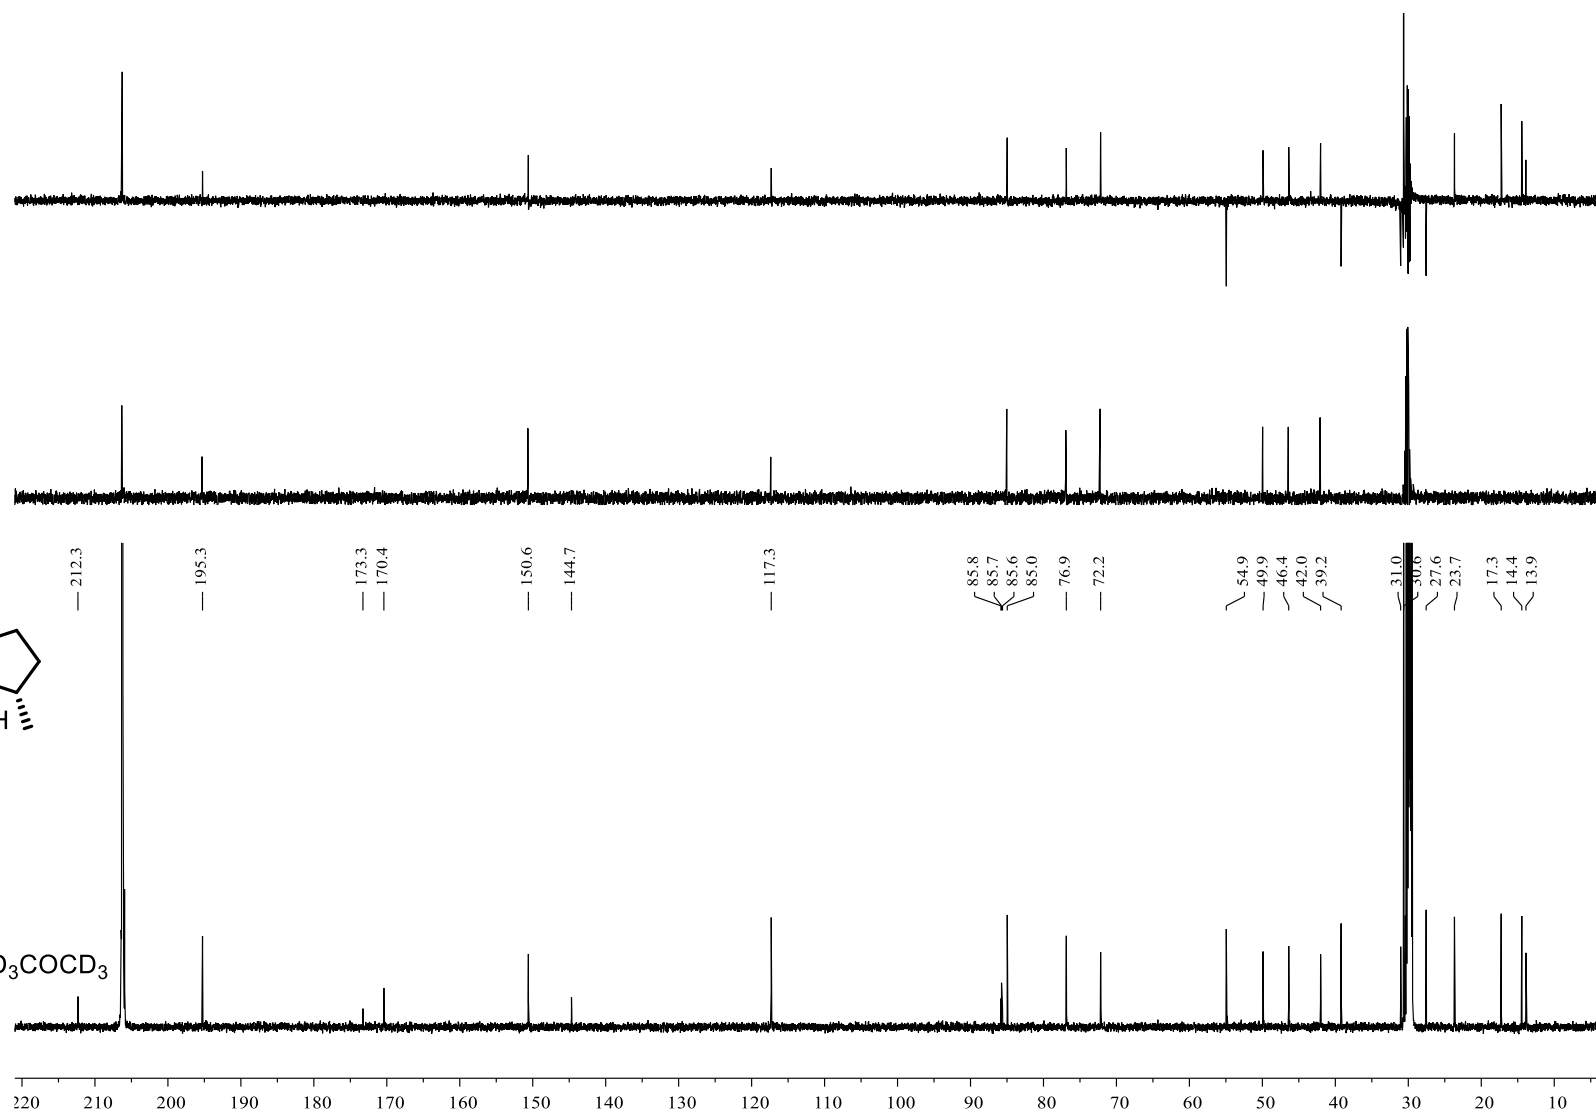

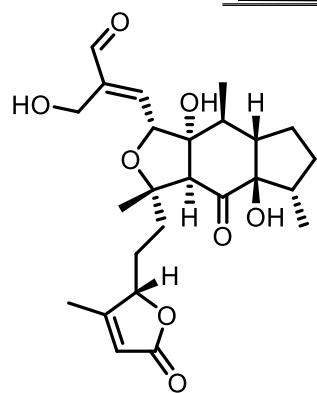

**16**

$^1\text{H}$ - $^1\text{H}$  COSY spectrum in  $\text{CD}_3\text{COCD}_3$

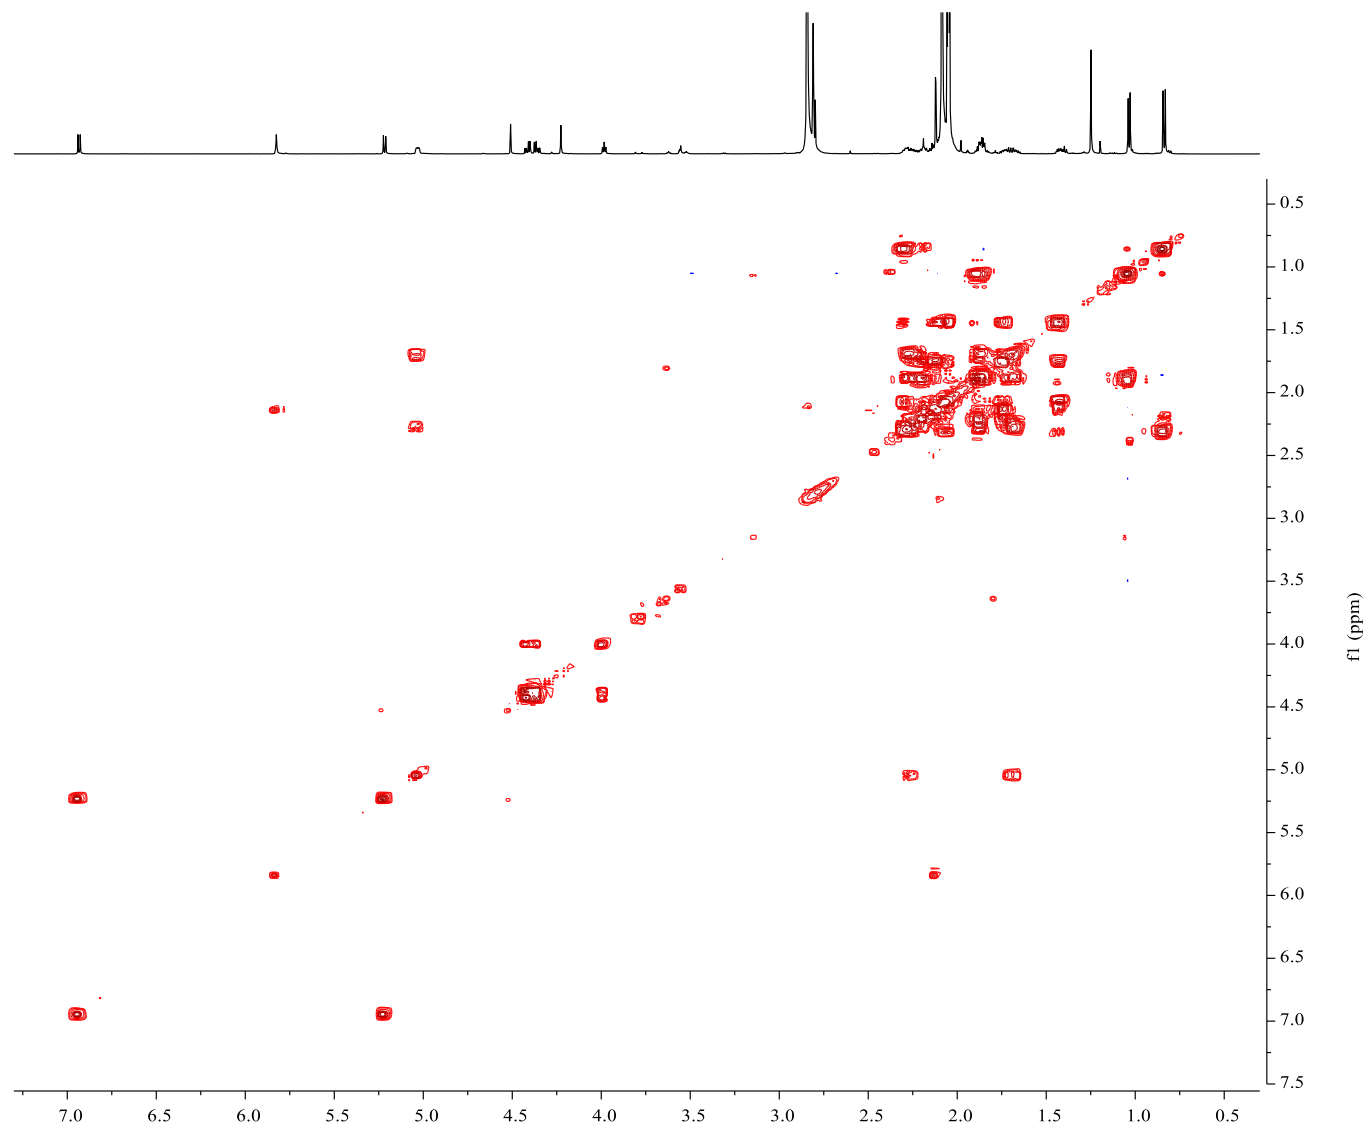

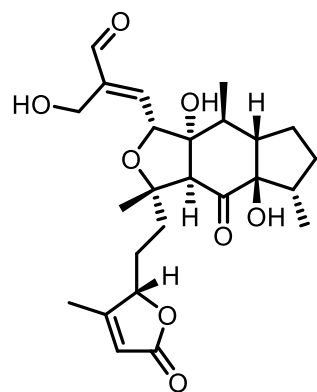

**16**

HSQC spectrum in  $\text{CD}_3\text{COCD}_3$

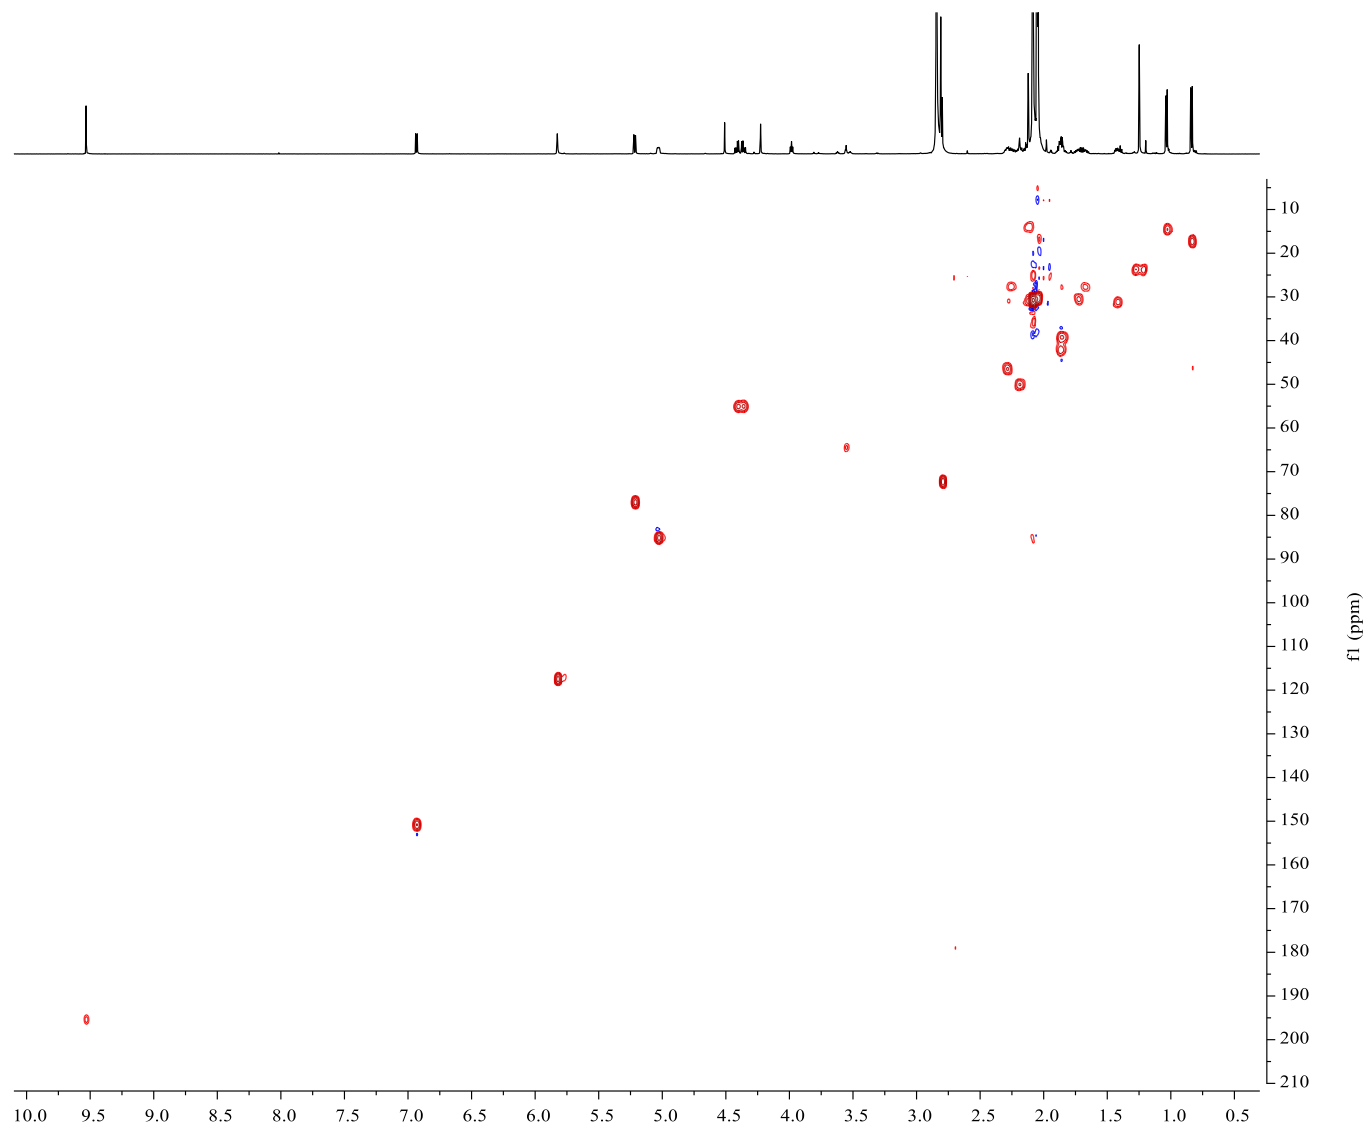

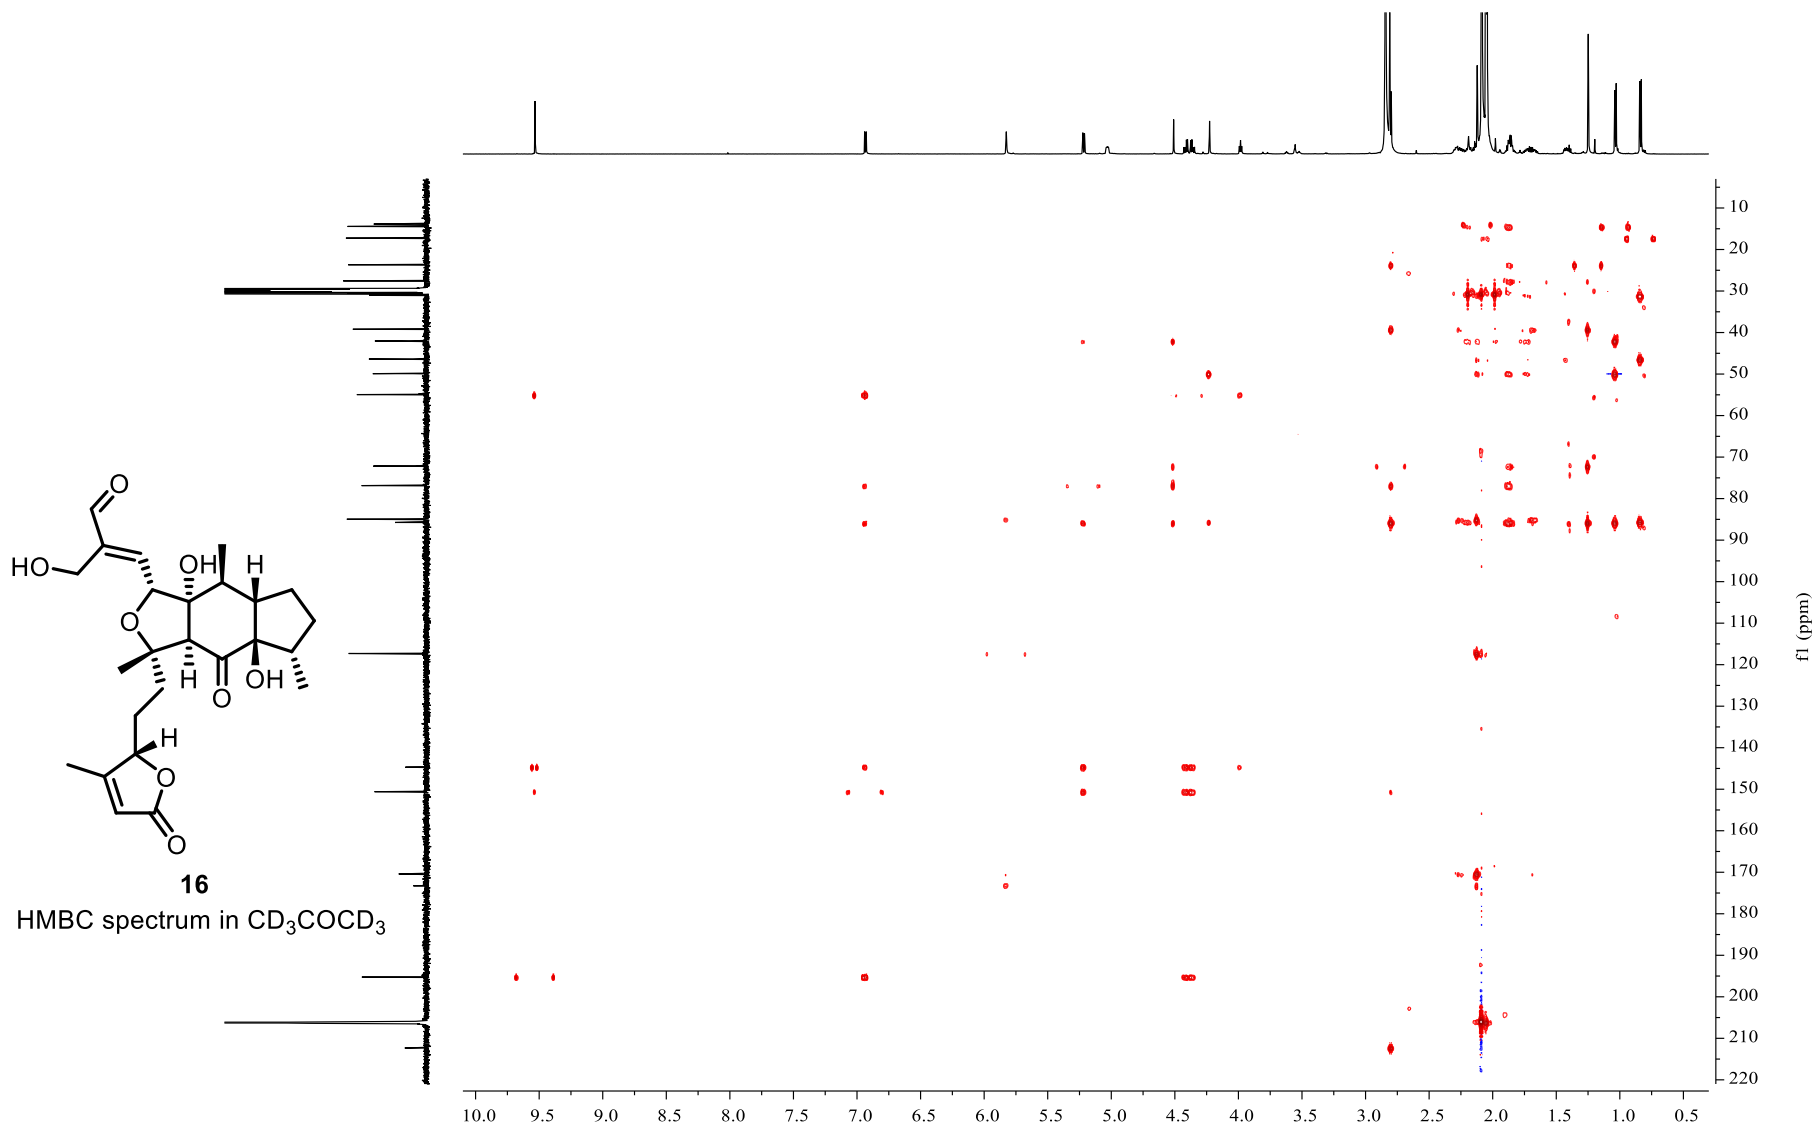

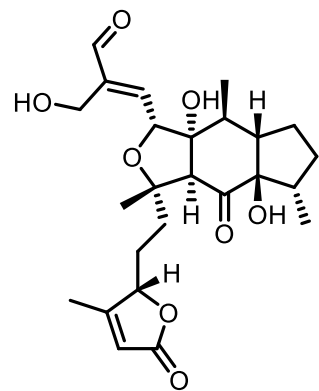

**16**

ROESY spectrum in  $\text{CD}_3\text{COCD}_3$

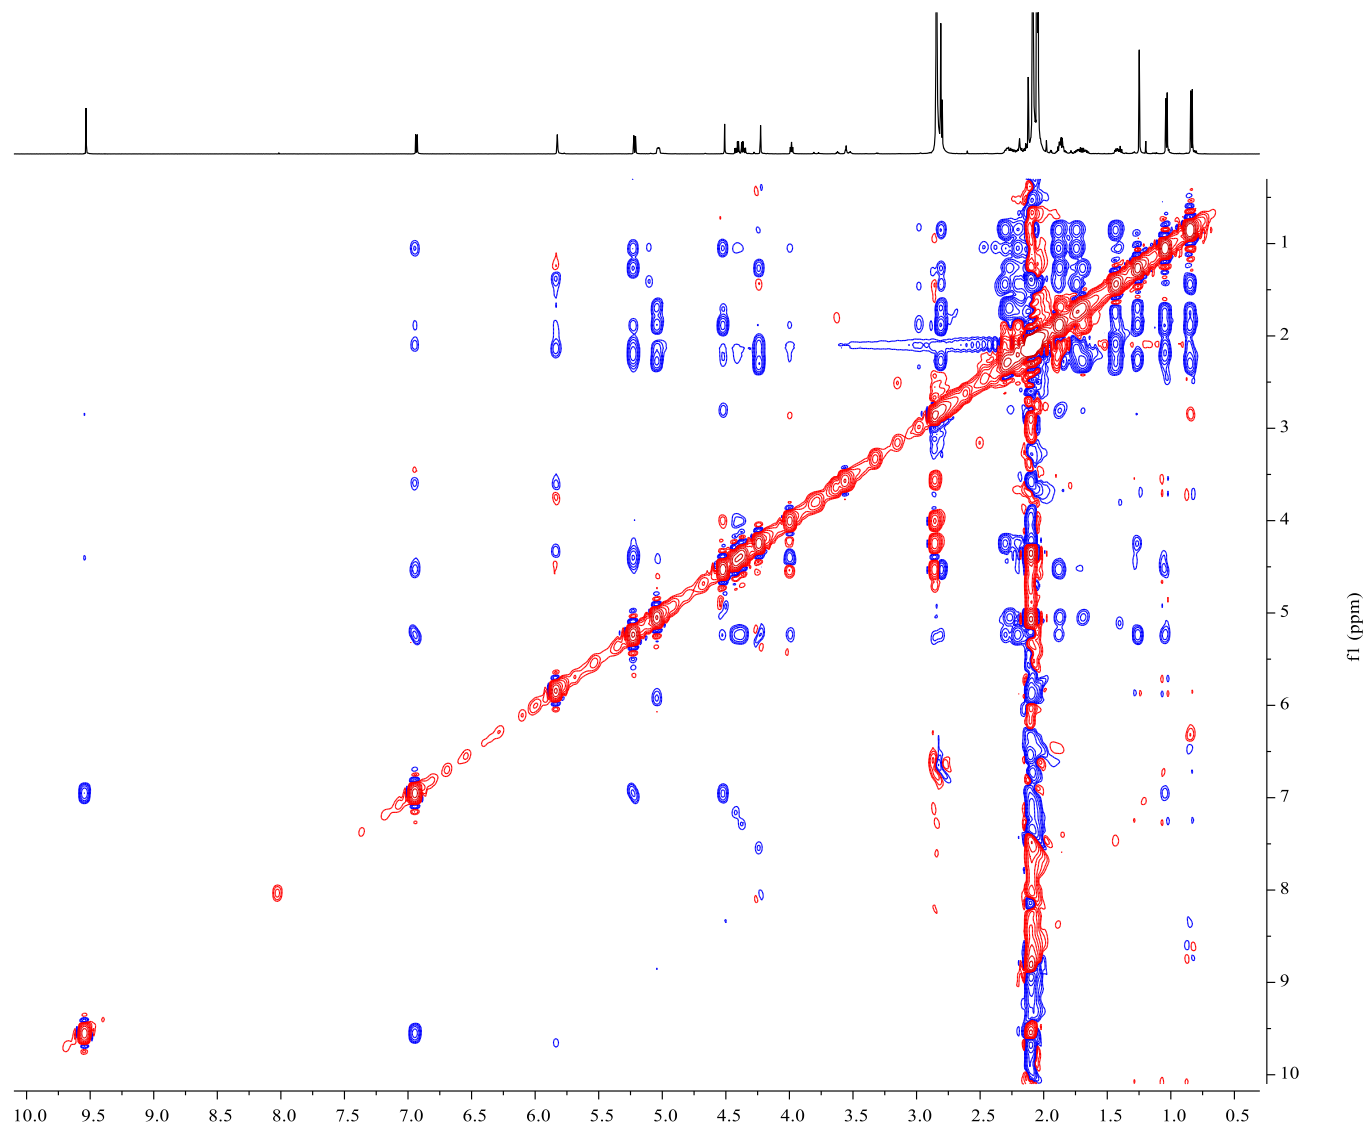

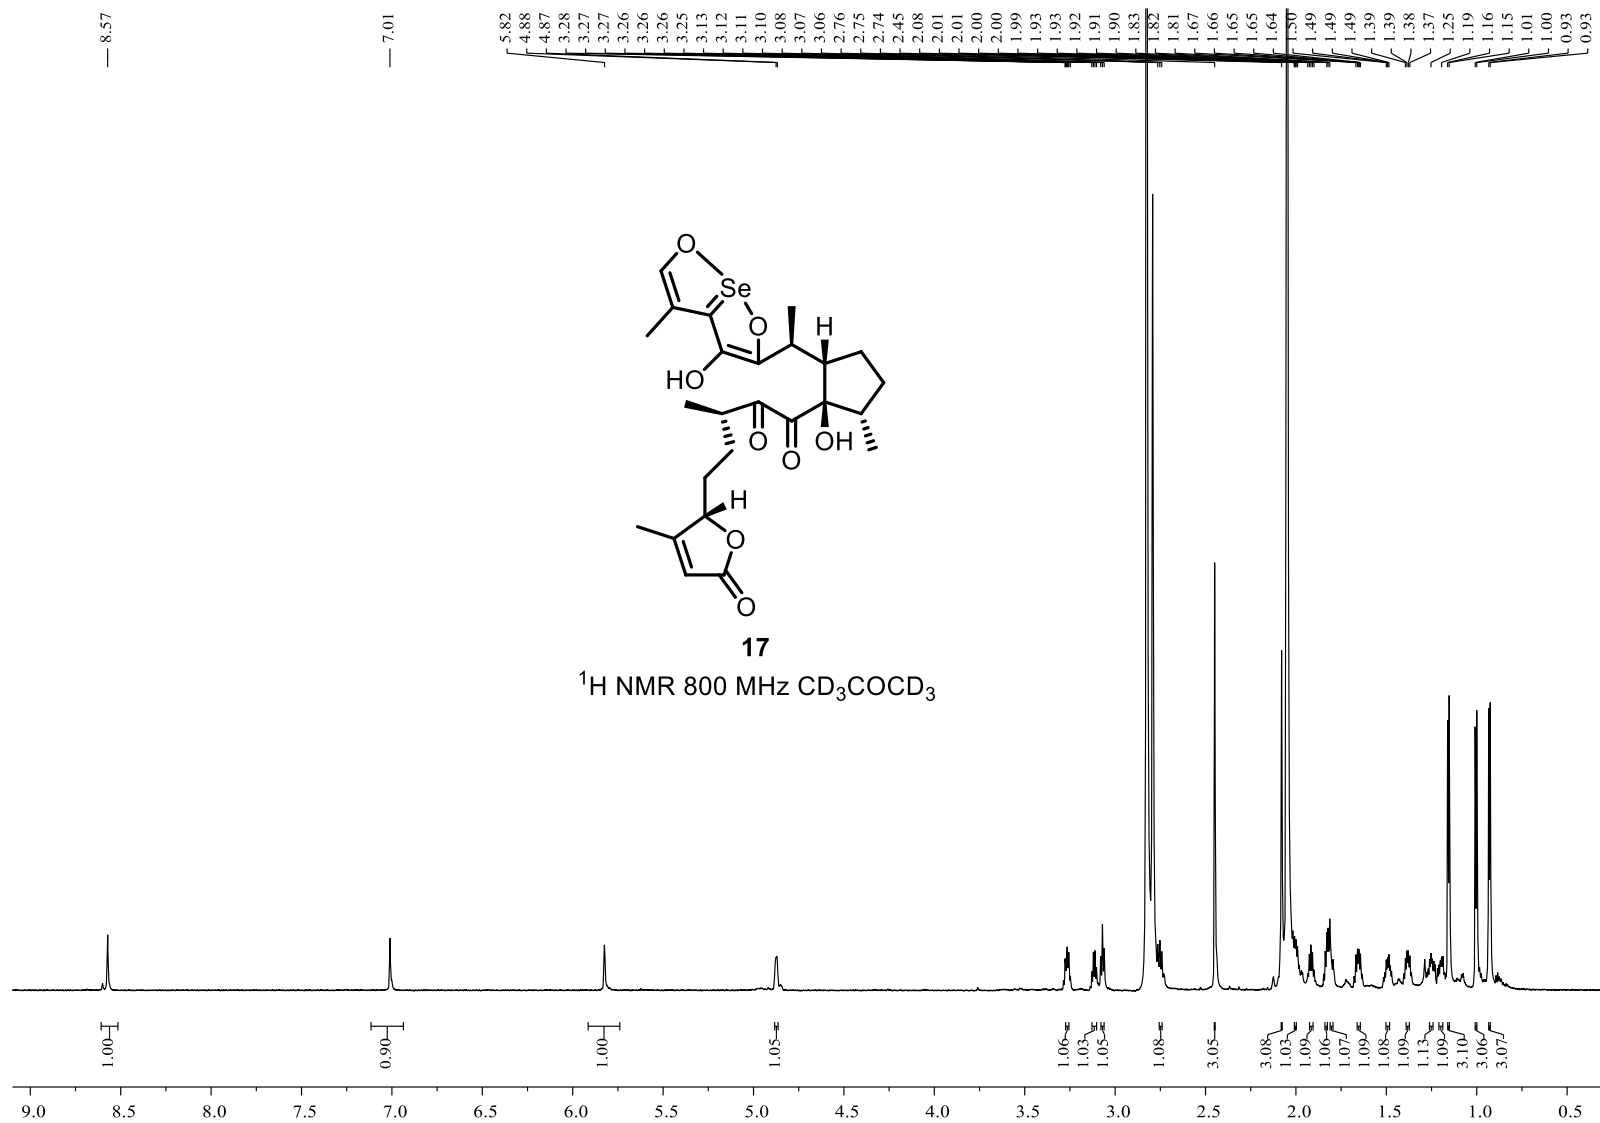

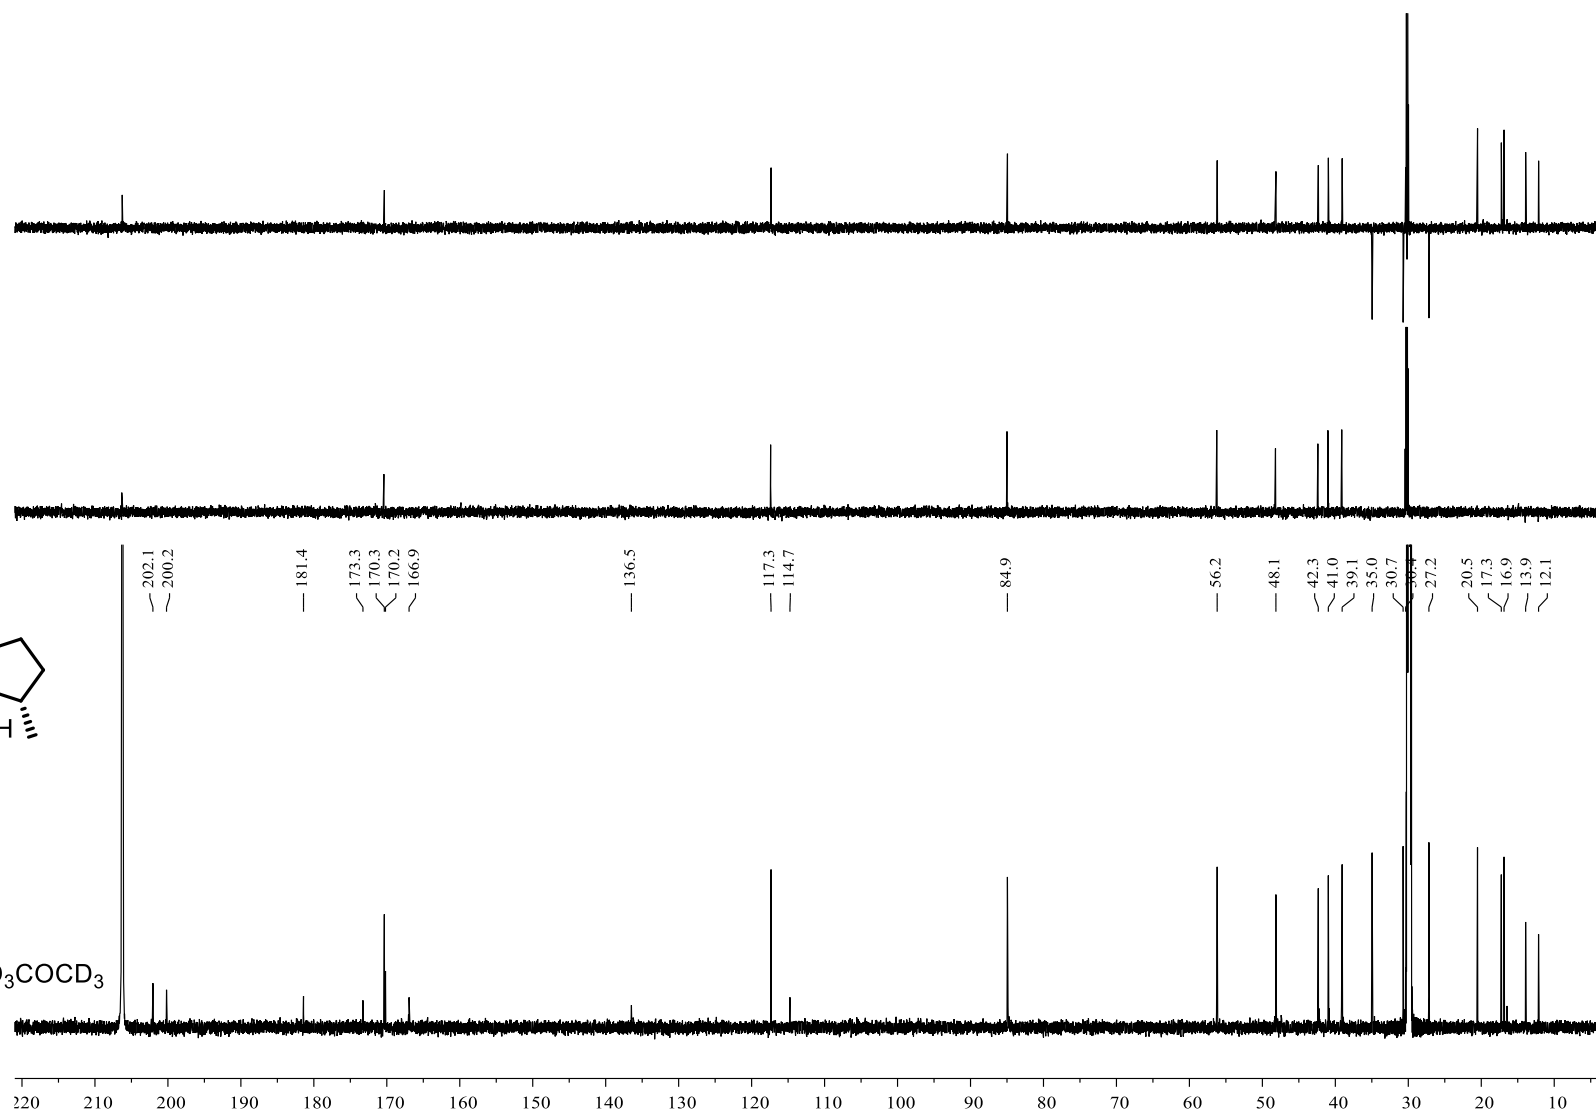

17  
 $^{13}\text{C}$  NMR 201 MHz  $\text{CD}_3\text{COCD}_3$

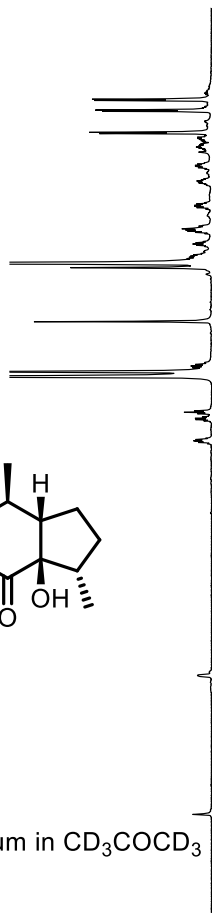 $^1\text{H}$ - $^1\text{H}$  COSY spectrum in  $\text{CD}_3\text{COCD}_3$ 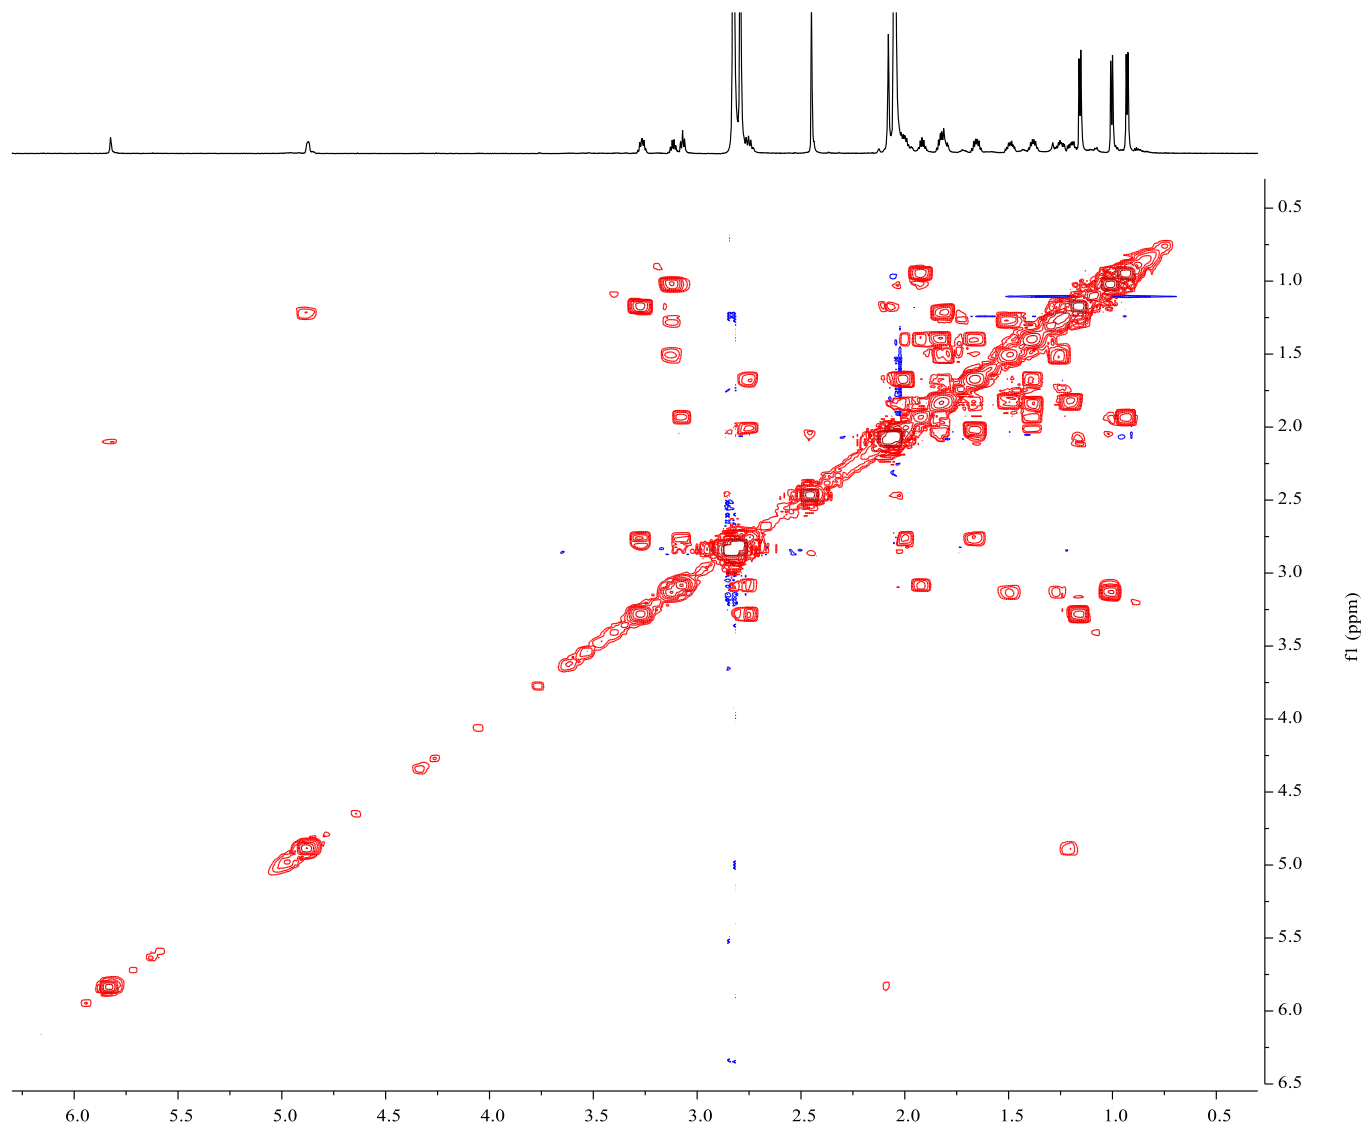

17  
HSQC spectrum in CD<sub>3</sub>COCD<sub>3</sub>

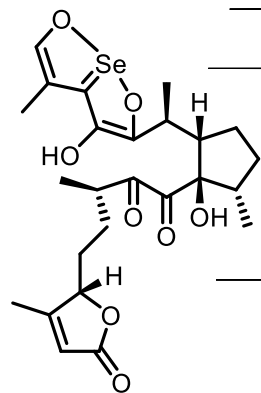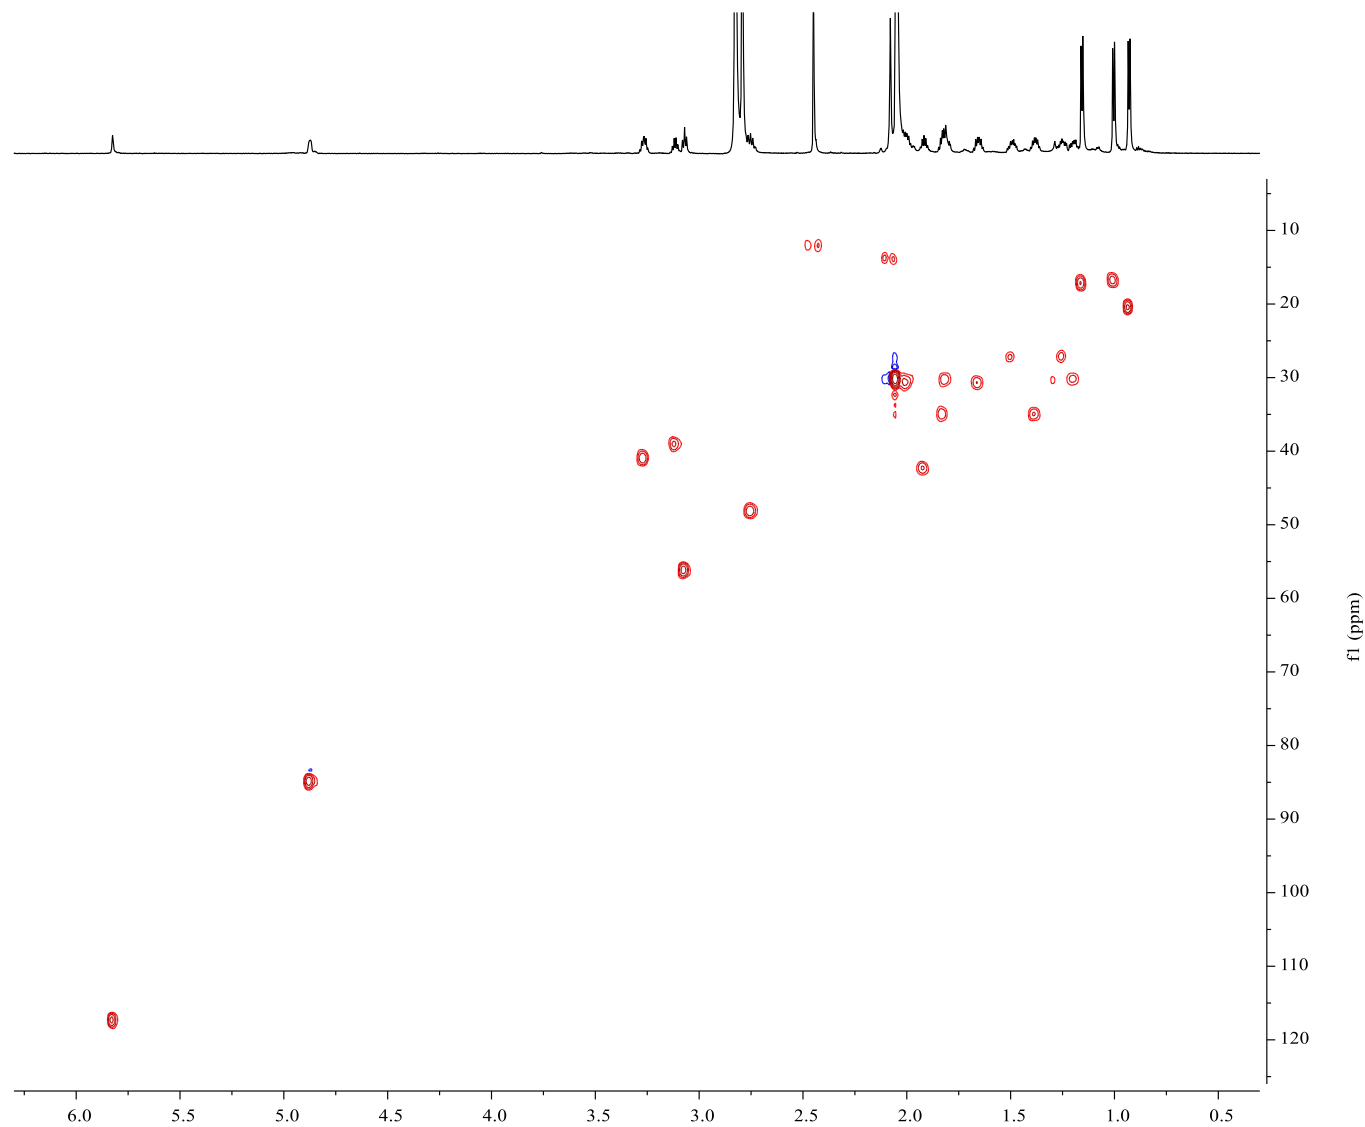

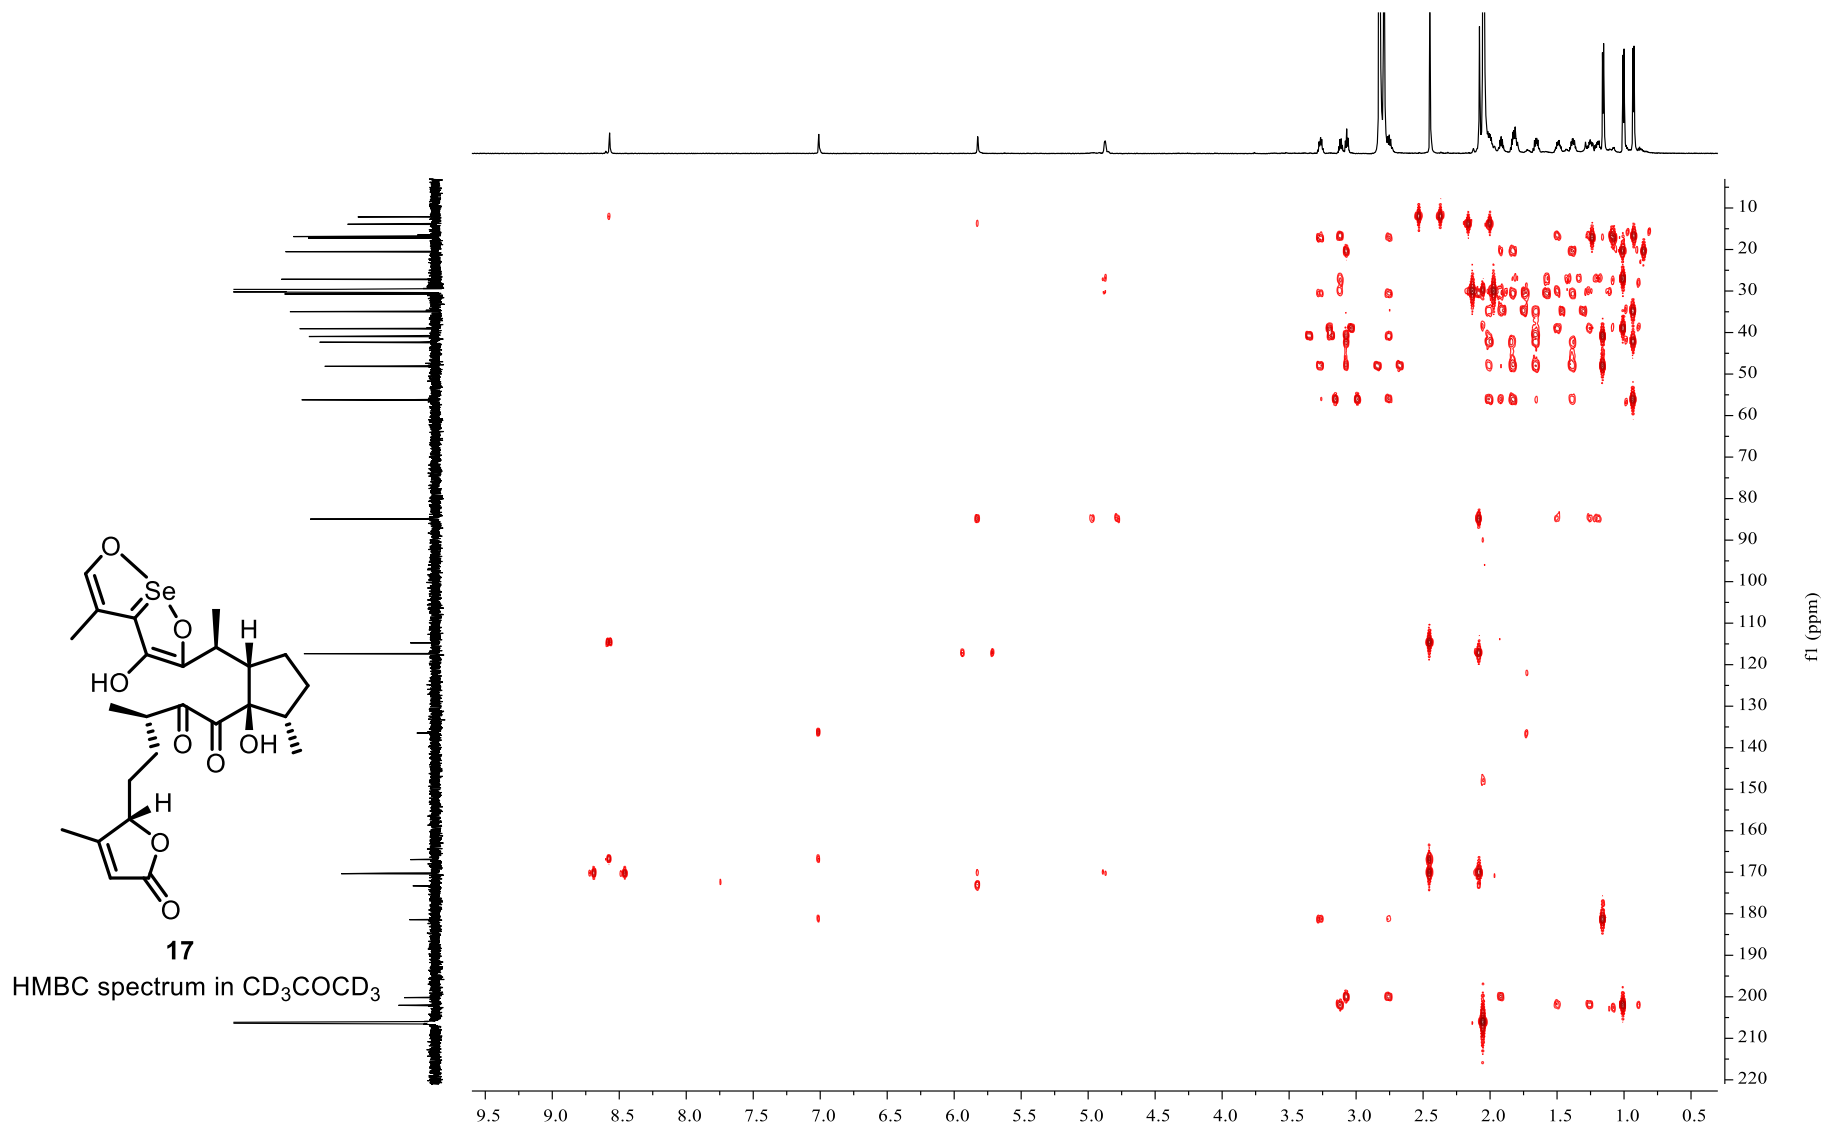

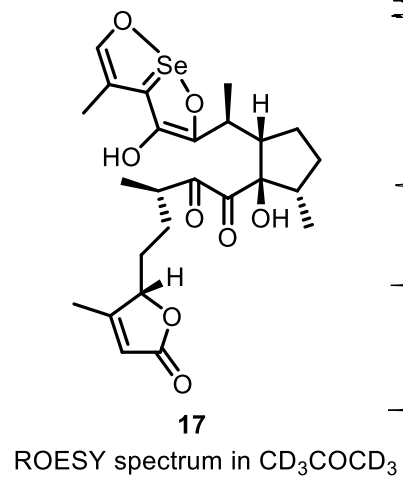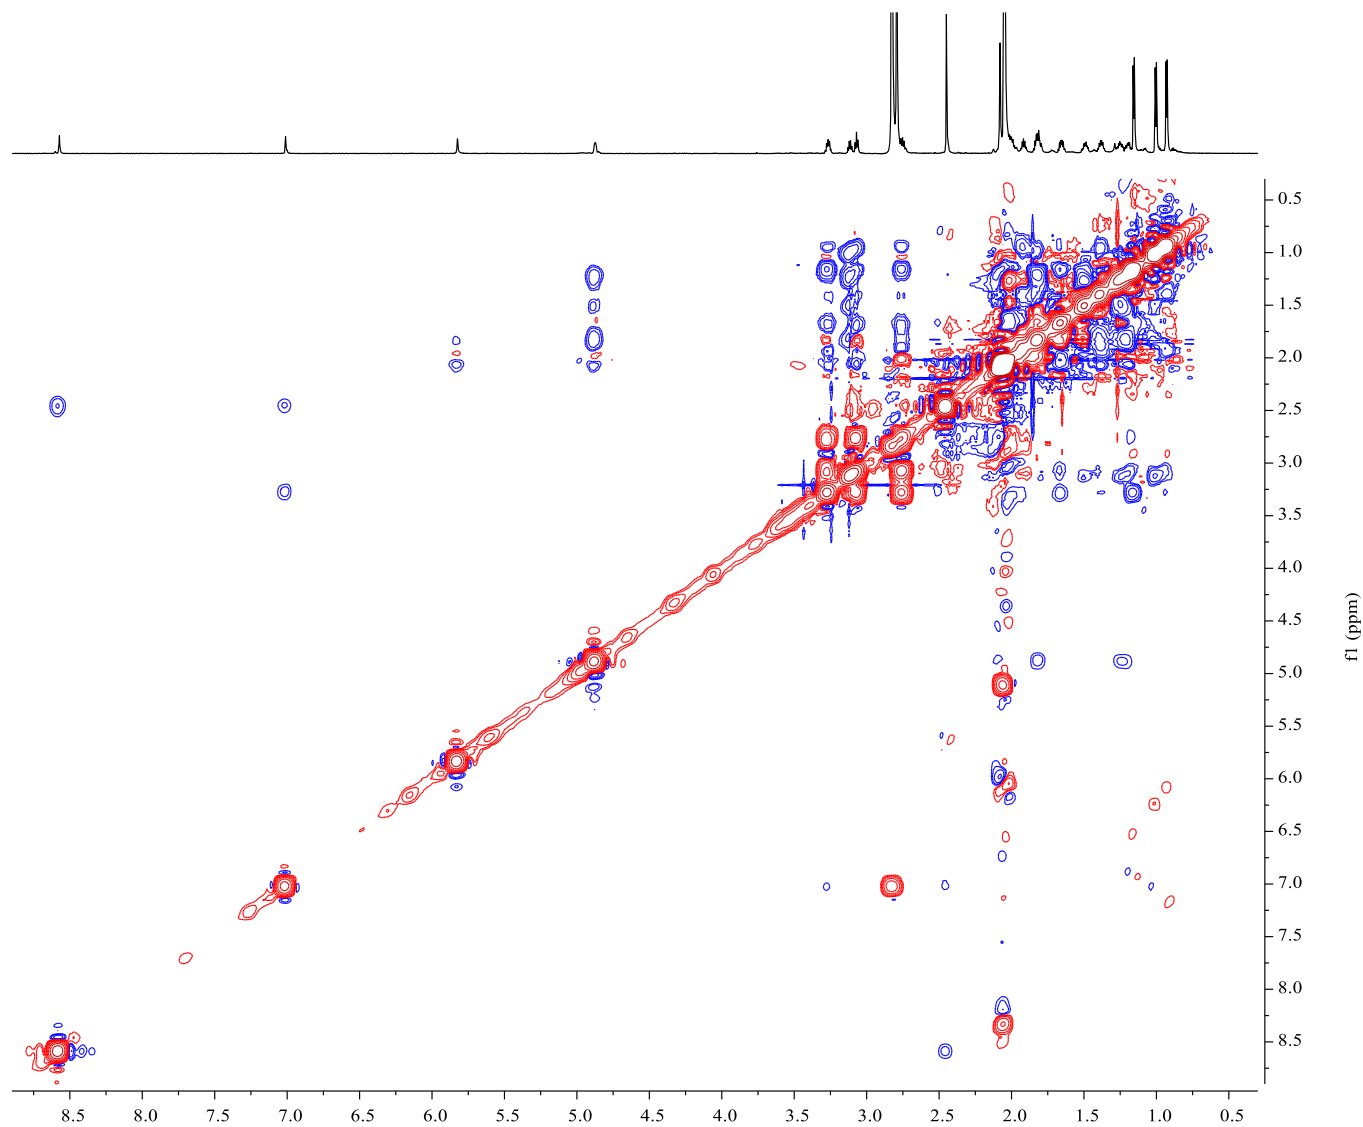

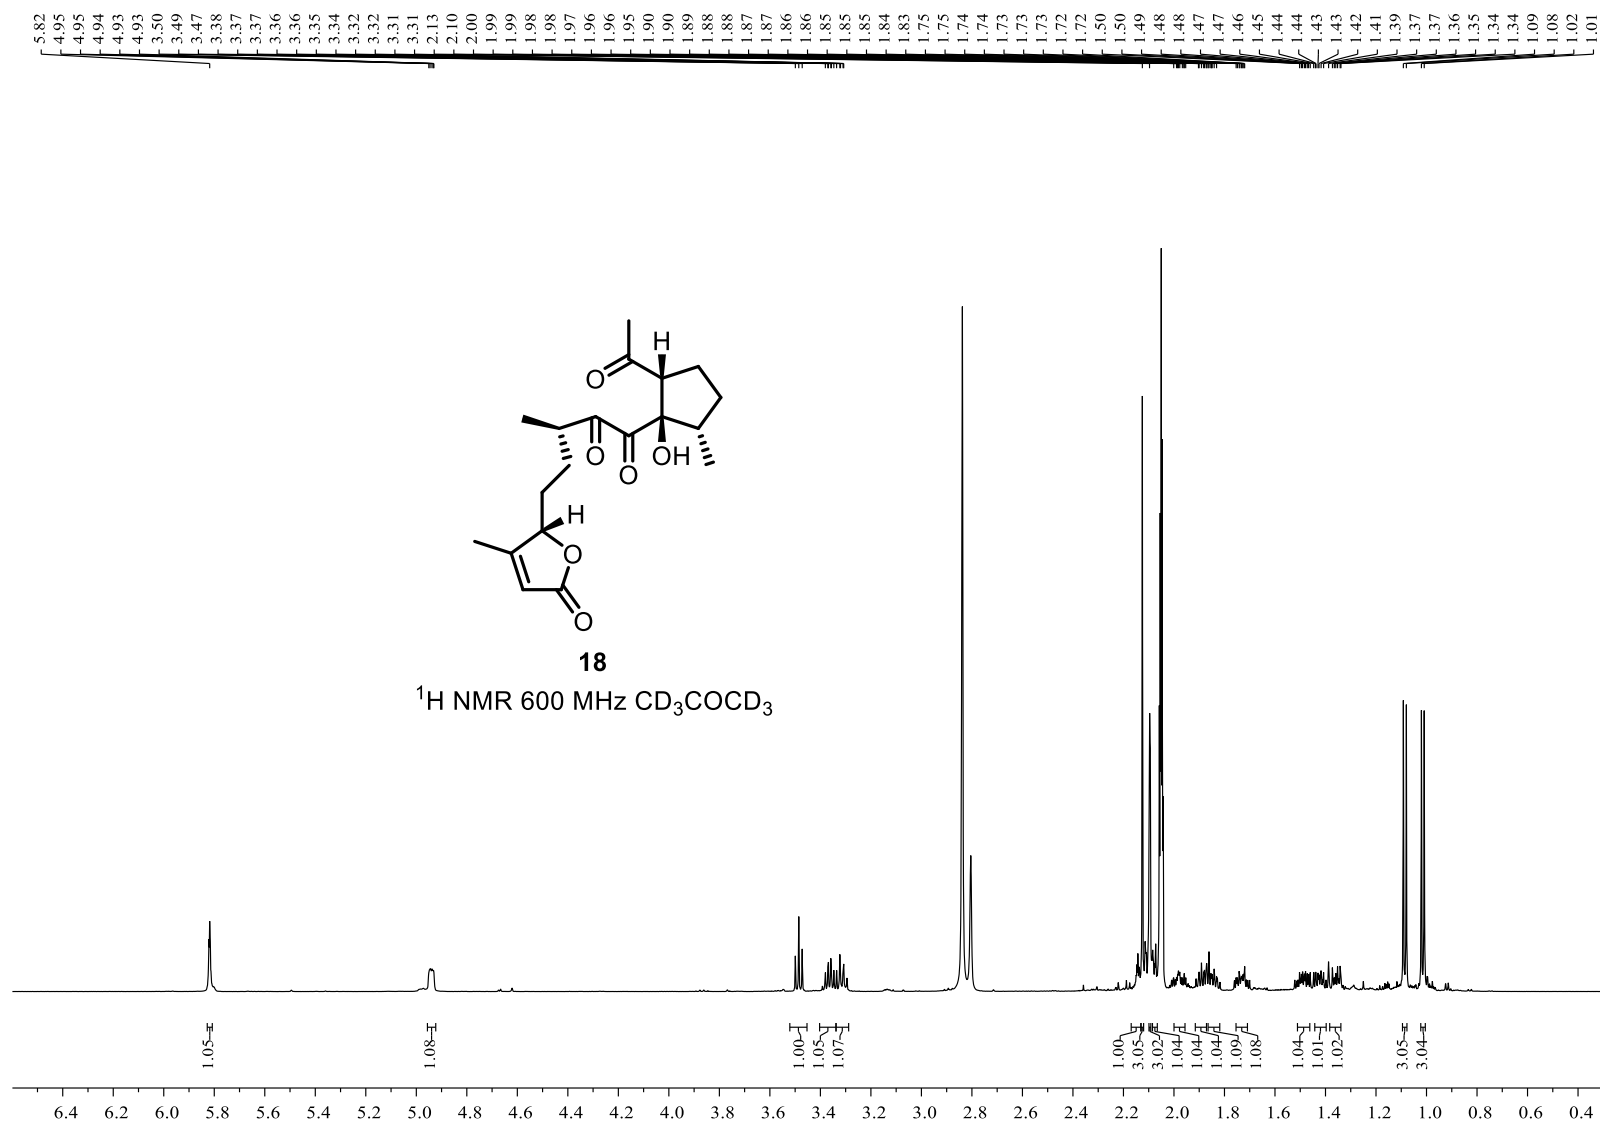

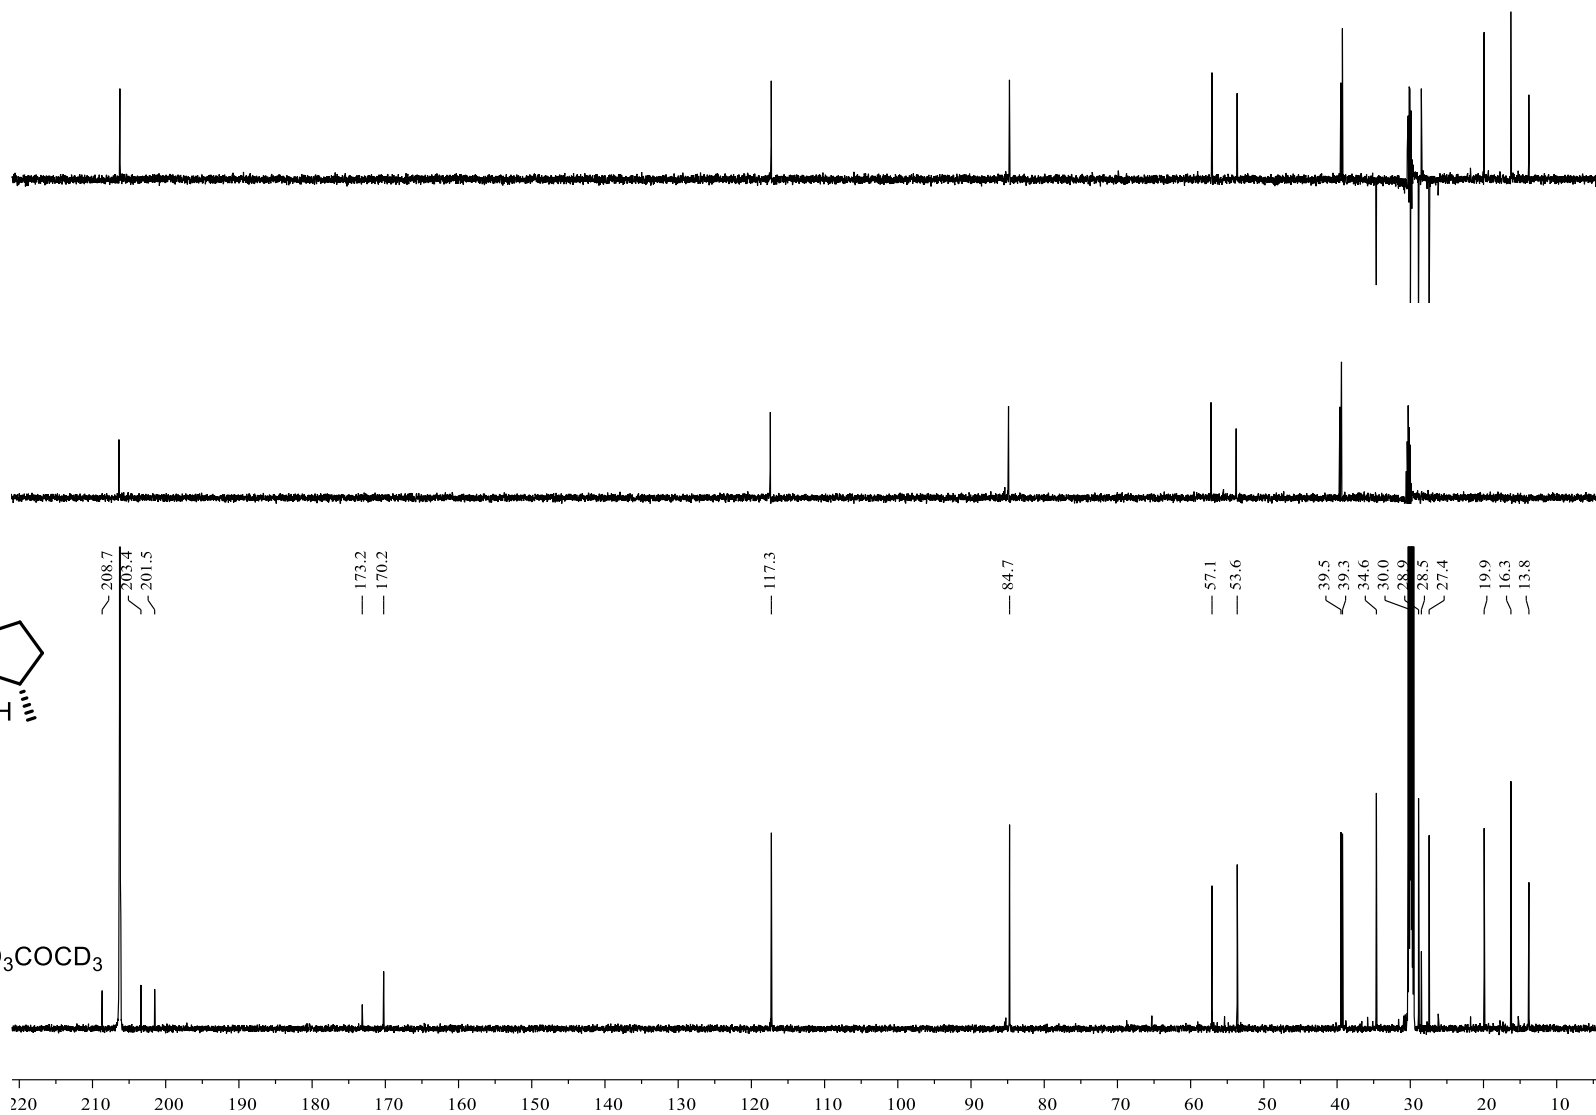

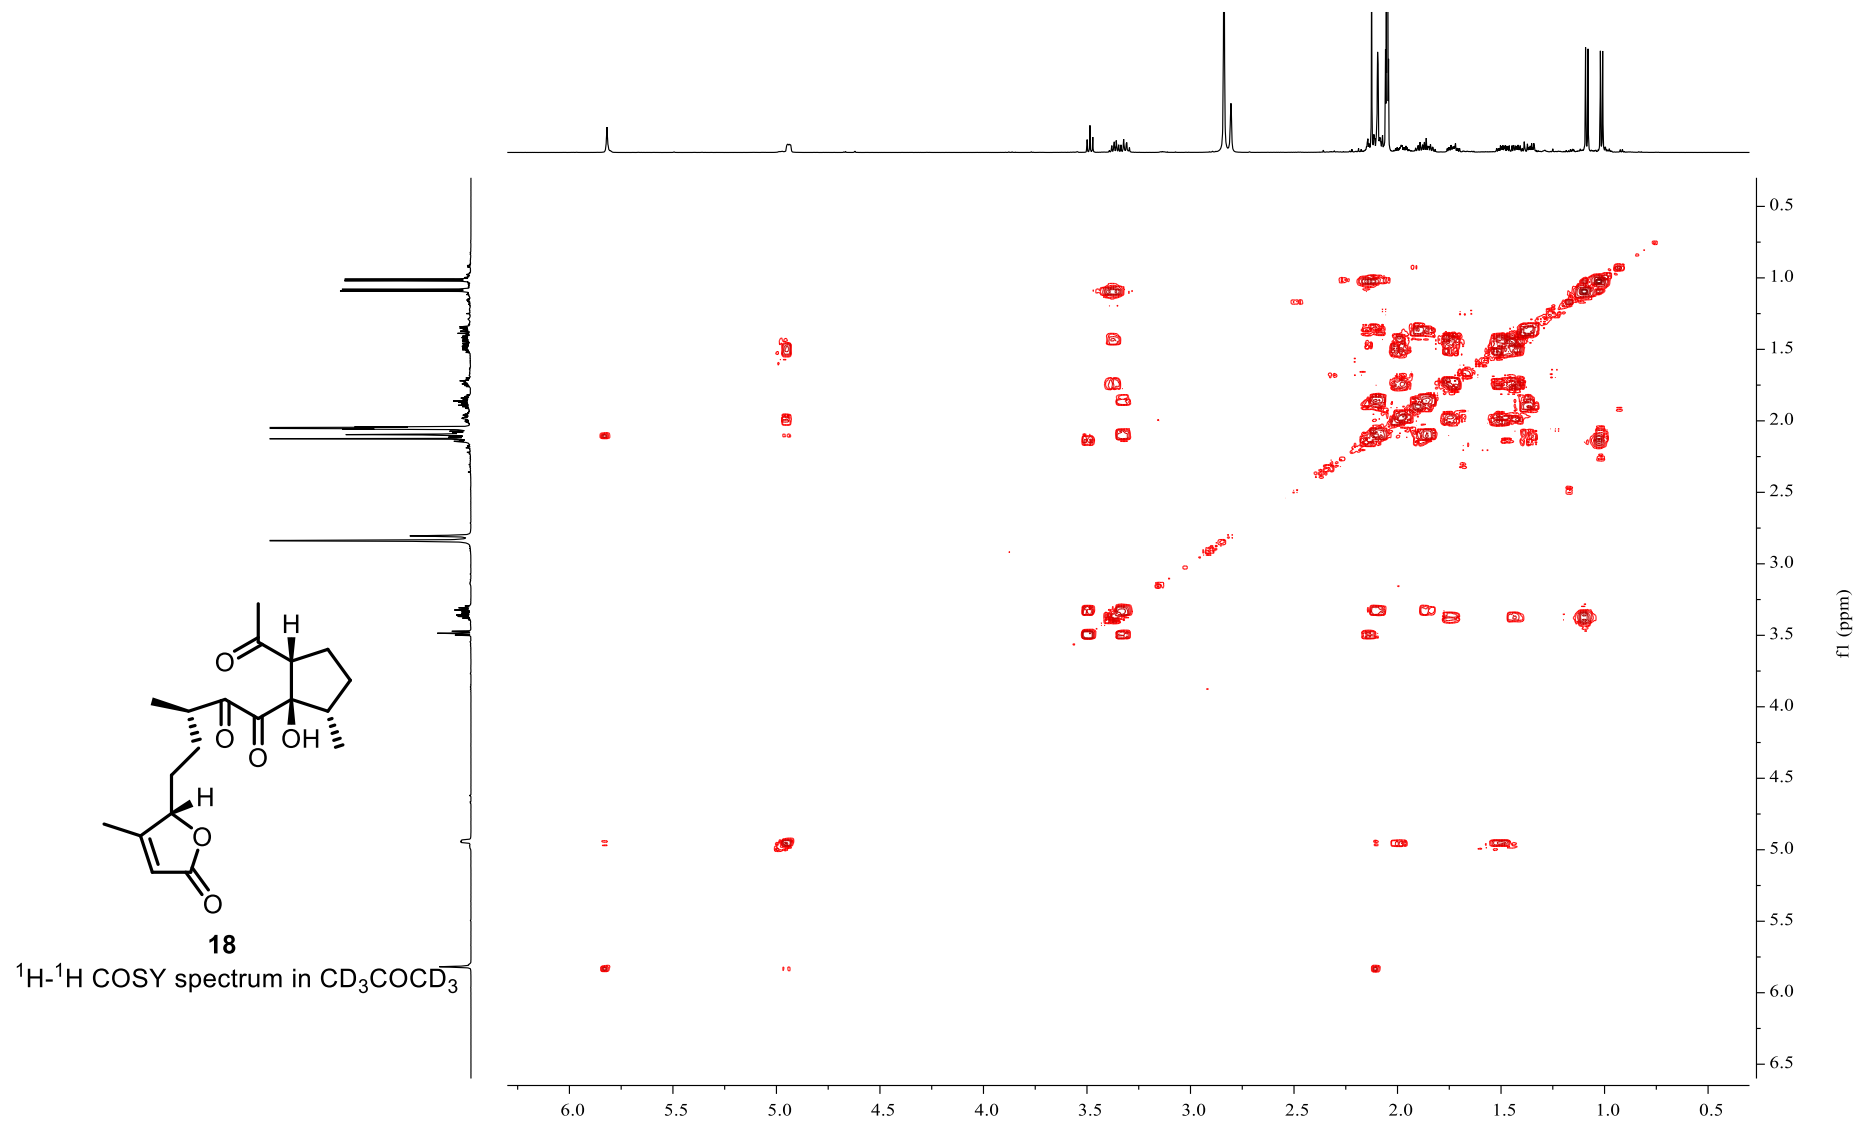

**18**  
HSQC spectrum in CD<sub>3</sub>COCD<sub>3</sub>

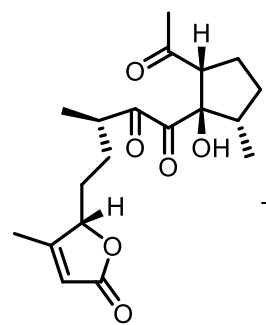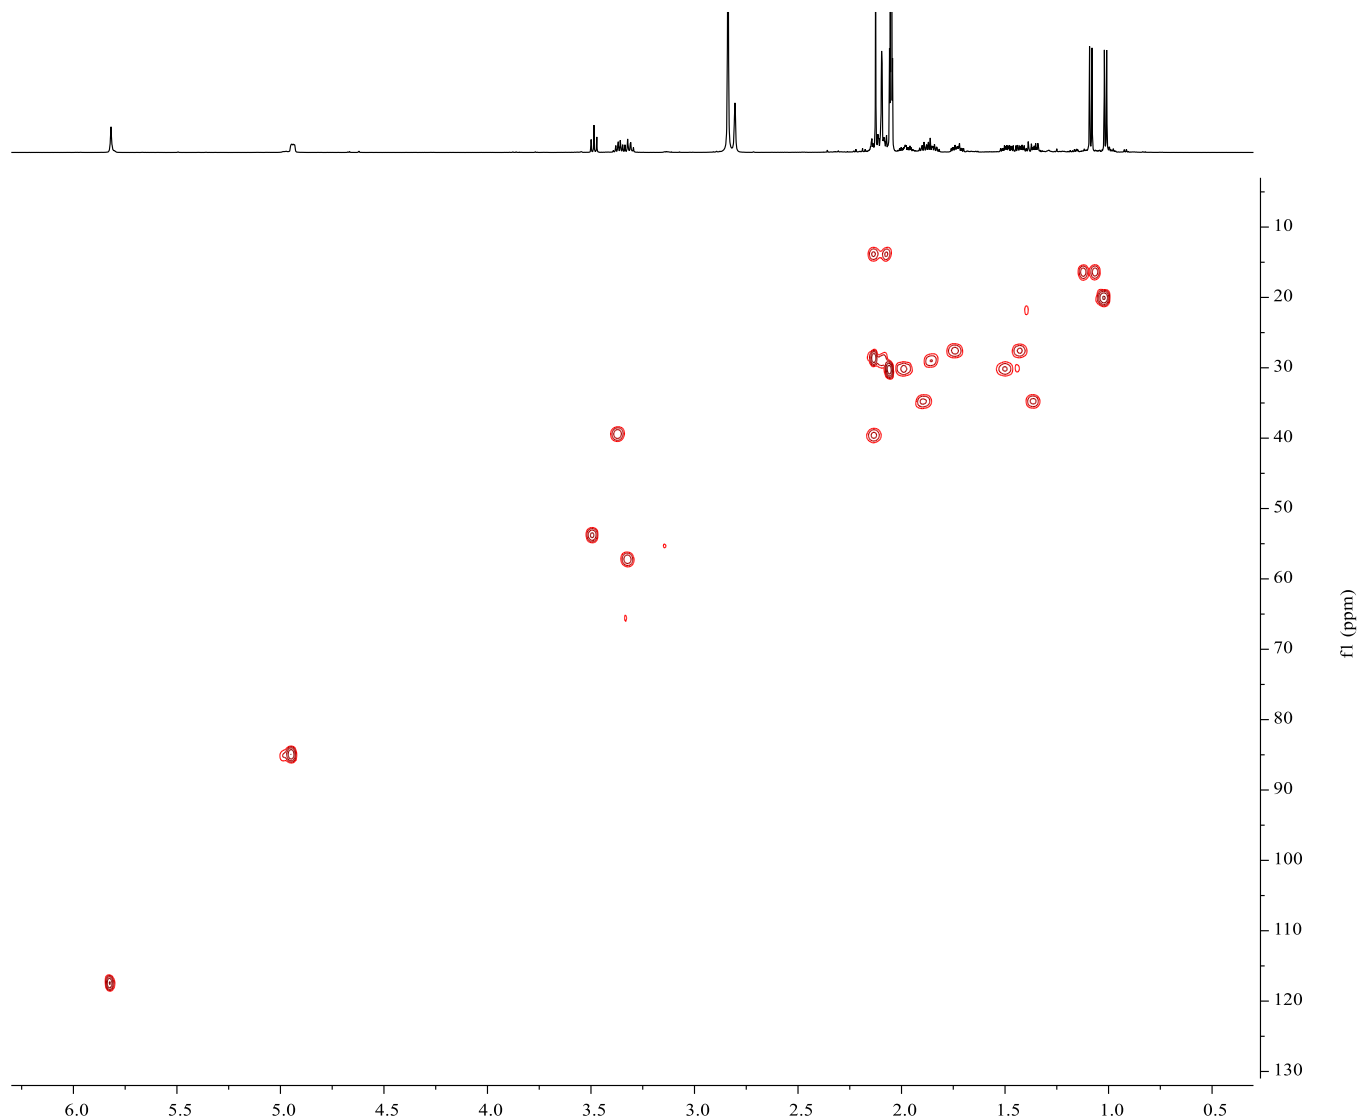

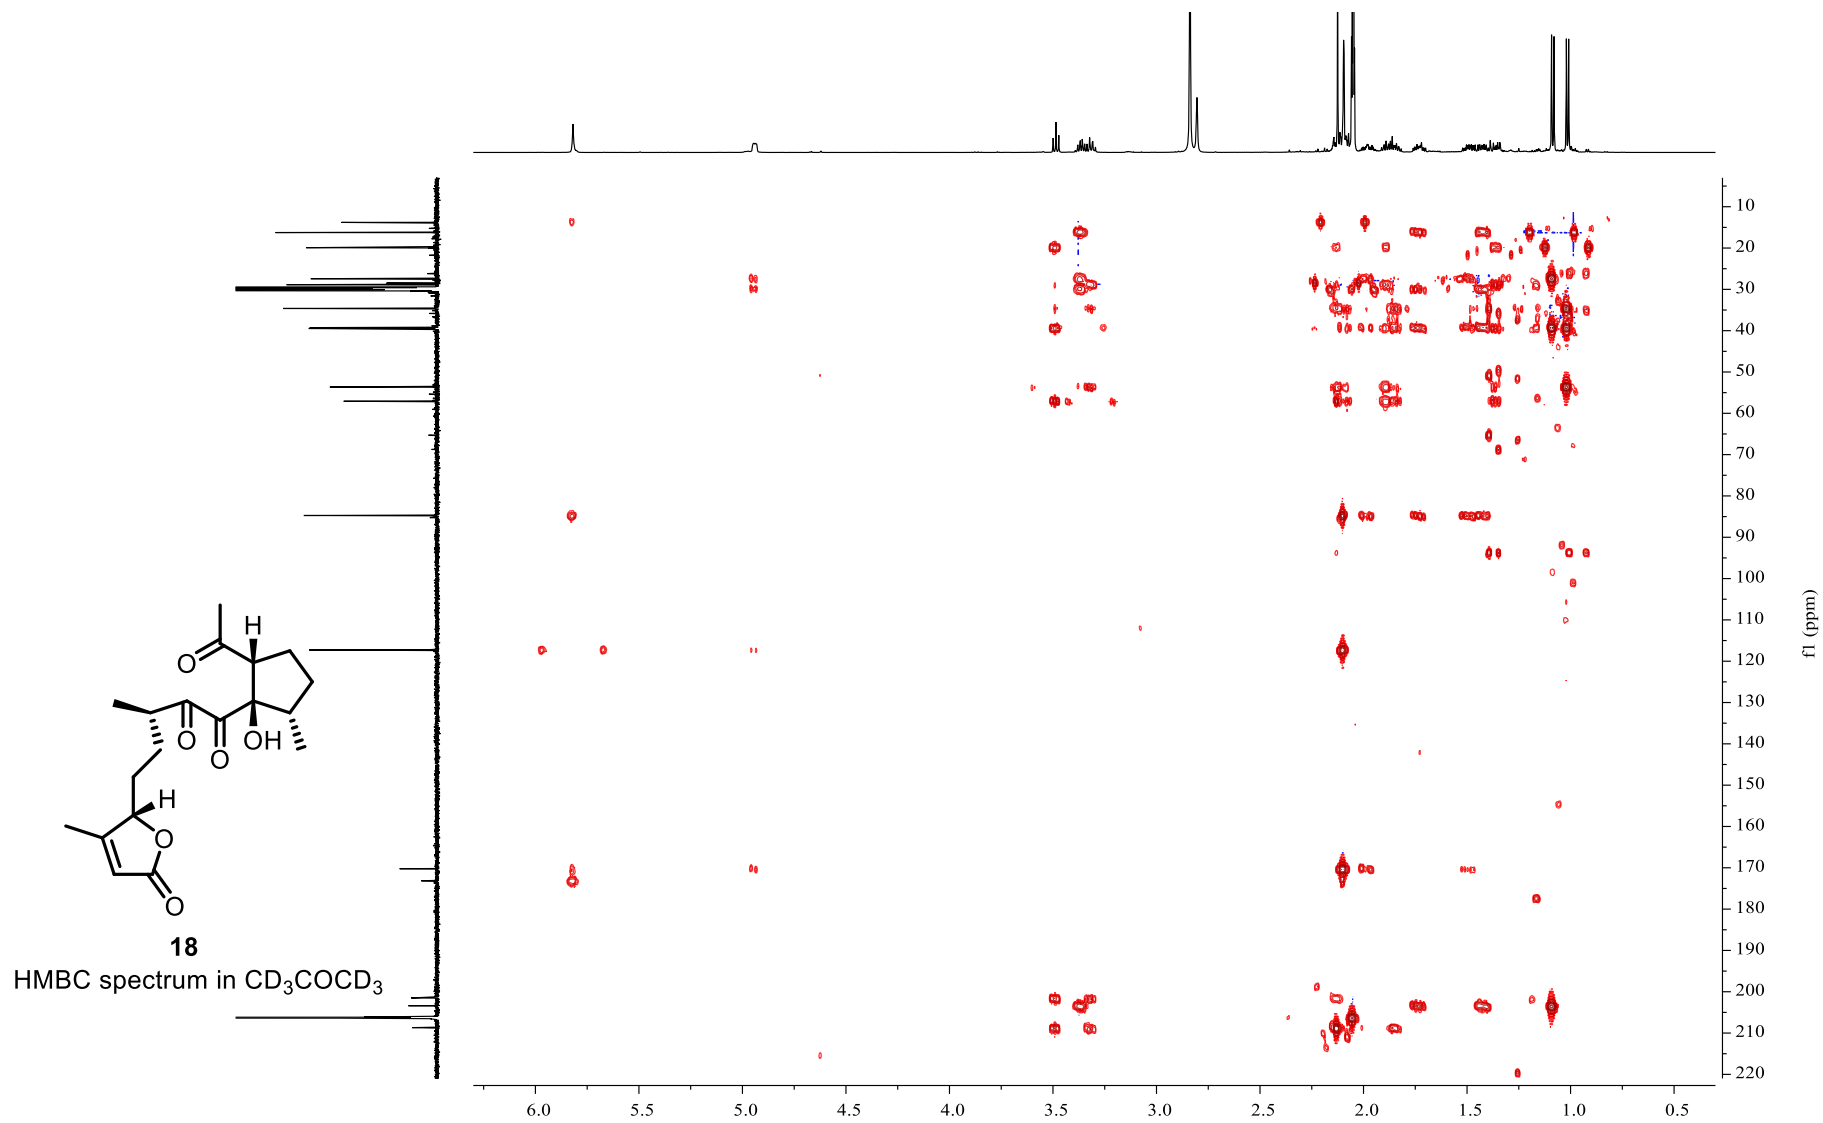

**18**  
ROESY spectrum in CD<sub>3</sub>COCD<sub>3</sub>

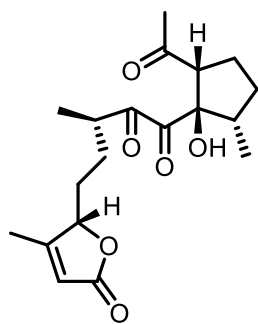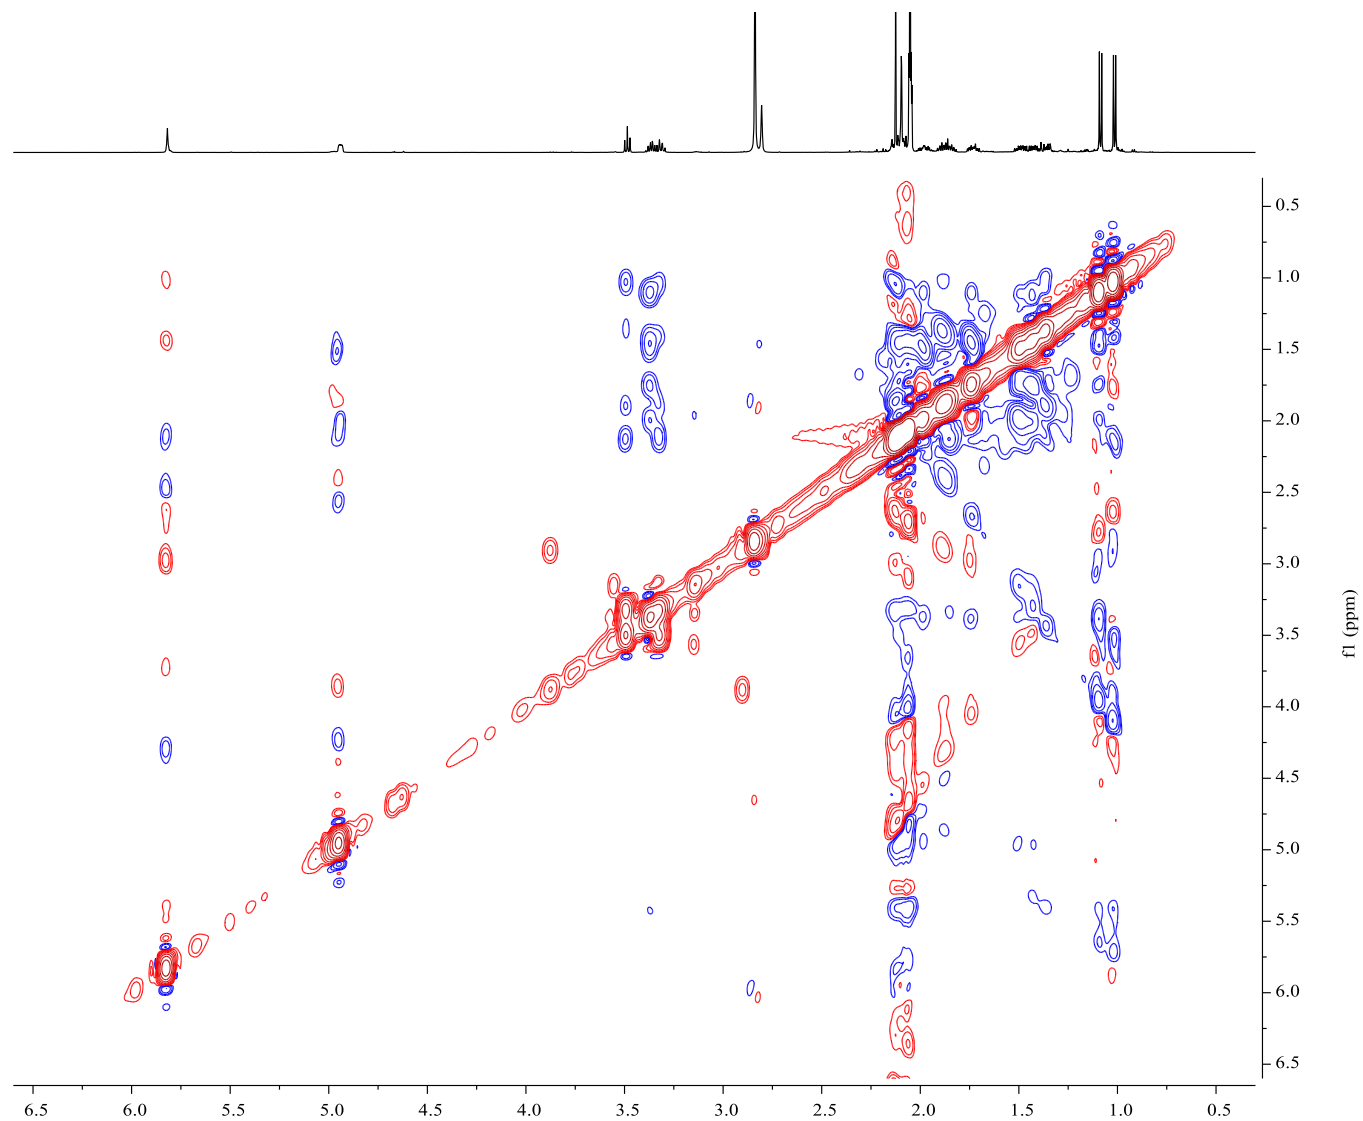

Supplement: d4cc03674c1.pdf [file d4cc03674c1.pdf]
